# Supplementary material for: Tobacco use and associated factors among adolescent students in Dharan, Eastern Nepal: a cross-sectional questionnaire survey
Source: PubMed Central journal article supplement — BMJ Open. 2013 Feb 14;3(2):e002123. doi: 10.1136/bmjopen-2012-002123 (PMC3585970; doi:10.1136/bmjopen-2012-002123), 2013-02-14
Supplement: bmjopen-2012-002123.draft_revisions.pdf [file bmjopen-2012-002123.draft_revisions.pdf]

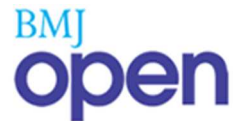

**Tobacco Use and Associated Factors among Adolescent Students in Dharan: A Cross Sectional Study**

|                                 |                                                                                                                                                                                                                                                                                                                                                                                                                                                                                                                                                         |
|---------------------------------|---------------------------------------------------------------------------------------------------------------------------------------------------------------------------------------------------------------------------------------------------------------------------------------------------------------------------------------------------------------------------------------------------------------------------------------------------------------------------------------------------------------------------------------------------------|
| Journal:                        | <i>BMJ Open</i>                                                                                                                                                                                                                                                                                                                                                                                                                                                                                                                                         |
| Manuscript ID:                  | bmjopen-2012-002123                                                                                                                                                                                                                                                                                                                                                                                                                                                                                                                                     |
| Article Type:                   | Research                                                                                                                                                                                                                                                                                                                                                                                                                                                                                                                                                |
| Date Submitted by the Author:   | 18-Sep-2012                                                                                                                                                                                                                                                                                                                                                                                                                                                                                                                                             |
| Complete List of Authors:       | Pradhan, Pranil; B.P.Koirala Institute of Health Sciences, School of Public Health and Community Medicine<br>Pokharel, Paras; B.P.Koirala Institute of Health Sciences, School of Public Health and Community Medicine<br>Niraula, Surya; B.P.Koirala Institute of Health Sciences, School of Public Health and Community Medicine<br>Ghimire, Anup; B.P.Koirala Institute of Health Sciences, School of Public Health and Community Medicine<br>Singh, Suman; B.P.Koirala Institute of Health Sciences, School of Public Health and Community Medicine |
| <b>Primary Subject Heading</b>: | Public health                                                                                                                                                                                                                                                                                                                                                                                                                                                                                                                                           |
| Secondary Subject Heading:      | Smoking and tobacco                                                                                                                                                                                                                                                                                                                                                                                                                                                                                                                                     |
| Keywords:                       | PUBLIC HEALTH, Substance misuse < PSYCHIATRY, PREVENTIVE MEDICINE                                                                                                                                                                                                                                                                                                                                                                                                                                                                                       |
|                                 |                                                                                                                                                                                                                                                                                                                                                                                                                                                                                                                                                         |

SCHOLARONE™  
Manuscripts

Only

**Title:** Tobacco Use and Associated Factors among Adolescent Students in Dharan: A Cross Sectional Study

**Corresponding Author:**

Dr. Prnil Man Singh Pradhan

Junior Resident

School of Public Health and Community Medicine

B.P. Koirala Institute of Health Sciences (BPKIHS)

Dharan, Nepal

Phone: 9771025-525555-2626

P.O. Box 56701

Email: prnil.pradhan@gmail.com

**Co authors:**

|    | <b>Co authors' Name</b>  | <b>Designation</b>   | <b>Department</b>                                                     |
|----|--------------------------|----------------------|-----------------------------------------------------------------------|
| 1. | Dr. Paras Kumar Pokharel | Professor and Chief  | School of Public Health and Community Medicine, BPKIHS, Dharan, Nepal |
| 2. | Dr. Surya Raj Niraula    | Additional Professor | School of Public Health and Community Medicine, BPKIHS, Dharan, Nepal |
| 3. | Dr. Anup Ghimire         | Associate Professor  | School of Public Health and Community Medicine, BPKIHS, Dharan, Nepal |
| 4. | Dr. Suman Bahadur Singh  | Associate Professor  | School of Public Health and Community Medicine, BPKIHS, Dharan, Nepal |

**Keywords:** tobacco use, adolescent students

**Word Count:** 2494

## Article Summary

### 1. Article focus

- What is the burden of tobacco use among the adolescent students of Dharan post legalization of anti tobacco directives in Nepal?
- What factors are likely to aggravate this burden among the students?

### 2. Key messages

- Significant burden of tobacco use exists among the adolescent students of Dharan despite the existence of anti-tobacco regulations in the country.
- Tobacco focussed interventions should target vulnerable groups to prevent uptake of the habit and support abstinence among the users taking the factors found significant in this study

### 3. Strengths

- Use of a standard questionnaire enabled our study for comparison with other national and international studies

### 4. Limitations

- Since tobacco use was assessed by self administered questionnaire, chances of bias in responses exist.
- Tobacco use status was not validated by biomarkers in our study.

1  
2  
3 **Tobacco Use and Associated Factors among Adolescent Students in Dharan: A Cross**  
4  
5 **Sectional Study**  
6  
7

8  
9 Pradhan PMS<sup>1</sup>, Pokharel PK<sup>2</sup>, Niraula SR<sup>3</sup>, Ghimire A<sup>4</sup>, Singh SB<sup>5</sup>  
10

11  
12 (<sup>1</sup>Junior Resident, <sup>2</sup> Professor, <sup>3</sup> Additional Professor, <sup>4</sup> Associate Professor, <sup>5</sup> Associate  
13  
14 Professor , School of Public Health and Community Medicine, BPKIHS)  
15  
16

17  
18 **Abstract**  
19

20  
21 **Introduction:** The tobacco use among the youth, in both smoking and smokeless forms, is quite  
22  
23 high in the South East Asia region. Tobacco use is a major proven risk factor and contributes  
24  
25 substantially to the rising epidemic of non communicable diseases.  
26  
27

28  
29 **Objectives:** To explore the burden of tobacco use and its associated factors among adolescent  
30  
31 students of Dharan municipality  
32  
33

34  
35 **Design:** Cross sectional  
36  
37

38  
39 **Setting:** Secondary and higher secondary schools of Dharan municipality in Sunsari district of  
40  
41 Nepal  
42

43  
44 **Participants:** Students in middle and late adolescence (aged 14-19 years) from grades 9, 10, 11  
45  
46 and 12 were included. Out of the total sample of 1454, 1312 students completed the  
47  
48 questionnaires giving the response rate of 90.23%.  
49  
50

51  
52 **Primary outcome measure:** Tobacco use which was defined as one who has ever used any  
53  
54 tobacco product.  
55  
56

1  
2  
3 **Methodology:** Self administered questionnaire adapted from Global Youth Tobacco Survey was  
4 used assess tobacco use among the representative sample of 1312 adolescent students in Dharan  
5 from July 2011 to July 2012 using stratified random sampling  
6  
7  
8  
9

10  
11 **Results:** Prevalence of ever use of any tobacco product was 19.7%. More than half of the  
12 tobacco users (51.9%) preferred to consume tobacco in public places whereas almost a third  
13 (75.6%) of the consumers purchased tobacco directly from the shops. Multivariate analysis  
14 showed that tobacco use was associated with late adolescence (OR: 1.92; 95%CI: 1.28-2.90),  
15 male gender (OR: 11.59; 95%CI: 7.44-18.05), Janajati ethnicity (OR: 2.11; 95%CI: 1.43-3.11)  
16 and having pocket money of more than or equal to NRs.500 per month (OR: 1.47; 95%CI: 1.06-  
17 2.05).  
18  
19  
20  
21  
22  
23  
24  
25  
26  
27

28 **Conclusion:** Tobacco focussed interventions are required for school/college going students in  
29 order to promote cessation among users and prevent initiation, focusing on the significant factors  
30 found by this study. Further researches are needed to explore the vulnerability of certain ethnic  
31 groups towards tobacco use to generate an effective awareness campaign.  
32  
33  
34  
35  
36  
37  
38  
39  
40  
41  
42  
43  
44  
45  
46  
47  
48  
49  
50  
51  
52  
53  
54  
55  
56  
57  
58  
59  
60

## Introduction

WHO estimates that there are about 1.1 billion smokers in the world, about one-third of the global population aged 15 years and older. Nearly 70% of the world's smokers live in low and middle income countries.[1] Unless a large number of current smokers in developing countries quit, it is estimated that smoking will be causing 10 million deaths per year worldwide by the 2020s or early 2030s, of which 7 million will be in developing countries.[2]

The tobacco use among the youth, in both smoking and smokeless forms, is quite high in the South East Asia region the major reason being the creative and targeted marketing strategies of various tobacco companies and its weak regulation. Abundant tobacco production, weak enforcement of tobacco control measures and easy accessibility and affordability of these products are other factors leading to the rise of the epidemic in the youth.[3] Although the exact burden of tobacco use among the youth has not been studied extensively in Nepal, a national Global Youth Tobacco Survey (GYTS) in 2007 reported that overall 7-9% of the students ever smoked cigarettes, even 1 or 2 puffs.[4] Some of the factors known to be associated with tobacco use among adolescents are age, gender, having smoker friends or parents and the amount of pocket money.[5-7]

The Government of Nepal had signed the Framework Convention on Tobacco Control (FCTC) on December 3, 2003 followed by its ratification by the House of Representatives on November 7, 2006. In what was regarded as a landmark in the nation's campaign against tobacco, the government finally assented to the anti-tobacco directives of Tobacco Product Control and Regulatory Act 2010 on November 4, 2011. This has reflected a strong will from the side of the government to comply by objectives set out in the convention. However, the implementation of

1  
2  
3 the anti-tobacco directives has not been experienced to the fullest. A need was felt to explore this  
4  
5 burden and the associated factors within the Nepalese youth who are the most vulnerable for  
6  
7 adoption of this habit and continuation, in a town of Sunsari district in the background of recent  
8  
9 endorsement of anti-tobacco directives by the government.  
10  
11

## 12 13 **Methods**

14  
15  
16 This was a comparative cross sectional study conducted in Dharan Municipality of Sunsari  
17  
18 district of Nepal from July 2011 to July 2012. It was shown in a study from South Delhi that the  
19  
20 overall prevalence of tobacco use (smoking and smokeless forms) was 20.9%.[8] We calculated  
21  
22 the minimum sample size to estimate the prevalence for 95% confidence limits at an allowable  
23  
24 error of 10% to be 1454 individuals.  
25  
26  
27

28  
29 Students in middle and late adolescence (aged 14-19 years) from grades 9, 10, 11 and 12 in  
30  
31 different schools of Dharan Municipality were included in this study. Current list of schools in  
32  
33 Dharan was obtained from Private and Boarding School's Organization, Nepal (PABSON). From  
34  
35 the list of 87 schools, stratified random sampling with proportionate allocation technique based  
36  
37 on population size was carried out. This was followed by random selection of classes from the  
38  
39 selected schools. All the students from the selected classes were included in the study.  
40  
41  
42

43  
44 Data collection was carried out using a self administered questionnaire adapted from Global  
45  
46 Youth Tobacco Survey (2001) containing questions regarding socio-demographic profile, pattern  
47  
48 of tobacco use, tobacco use by parents, parental occupation, awareness regarding FCTC and,  
49  
50 pocket money received per month etc. The questionnaire to be used was pretested among the  
51  
52 adolescent students in a different area (Itahari) and necessary corrections and modifications were  
53  
54  
55

1  
2  
3 made in order to make it more understandable for the students. An elaborative briefing on the  
4 questionnaire was done to all the students of the class prior to data collection. The outcome  
5 variable was tobacco use which was defined as one who has ever used any tobacco product.  
6  
7  
8 Current tobacco use was defined as one who has used tobacco product (smoking or chewing) in  
9  
10 the past one month. Non user was the one who had never consumed any tobacco product.  
11  
12  
13

14  
15  
16 On the basis of age, participants were classified into middle (14-15 years) and late (16-19 years)  
17  
18 adolescence. The pocket money was dichotomized based on the median amount received per  
19  
20 month.  
21  
22

23  
24 Ethical clearance was acquired from the ethical committee of B.P. Koirala Institute of Health  
25  
26 Sciences at the start of the study. Informed consent was taken from all the participants. We  
27  
28 obtained written permission from the school authorities before interaction with the students. All  
29  
30 the students present at the time of the visit were included in the study. Participation in the study  
31  
32 was entirely voluntary and full confidentiality of the responses was maintained after clear  
33  
34 explanation of the objectives of the study. Absence of any school personnel or teacher at the time  
35  
36 of data collection was ensured in order to prevent response bias.  
37  
38  
39

40  
41 Collected data were entered into MS Windows Excel in the form of codes. Analysis was  
42  
43 performed using Statistical Package for Social Sciences (SPSS) 17 version. Chi-Square test was  
44  
45 applied to compare the difference between categorical variables among the groups. Bivariate  
46  
47 analysis and binary logistic regression analysis were performed. Goodness of fit of the model  
48  
49 was tested by Hosmer and Lemeshow test. Probability of significance was set at 5%.  
50  
51  
52  
53  
54  
55  
56  
57  
58  
59  
60



## Results

Out of the total sample, 1312 students completed the questionnaire giving the response rate of 90.23%. Among the remaining questionnaires, eighty were incomplete whereas sixty two did not match the age criteria therefore were excluded from the data analyses.

Among the participants, the mean age was 15.70 years (SD = 1.33). Proportion of students in the age group of middle adolescence (14-15 years) and late adolescence (16-19 years) were almost equal. The participation was almost equal from both the gender (Male: Female=1.1:1). Participants who were Janajati by ethnicity were predominant. Other religions comprised of Christianity, Muslim, Jainism, Sahajyog and Heavenly path or Premwaad (Lovism). (Table 1)

**Table 1: Socio-demographic characteristics of the adolescent students in Dharan, Sunsari**  
(N=1312)

| Characteristics          | Number | Percentage |
|--------------------------|--------|------------|
| <b>Age Group (years)</b> |        |            |
| 14-15                    | 648    | 49.4       |
| 16-19                    | 664    | 50.6       |
| <b>Gender</b>            |        |            |
| Male                     | 694    | 52.9       |
| Female                   | 618    | 47.1       |
| <b>Education Level</b>   |        |            |
| 9                        | 551    | 42         |
| 10                       | 422    | 32.2       |

|                   |      |      |
|-------------------|------|------|
| 11                | 174  | 13.3 |
| 12                | 165  | 12.6 |
| <b>Ethnicity</b>  |      |      |
| Janajati          | 816  | 62.2 |
| Brahmin/Chhetri   | 335  | 25.5 |
| Terai Major Caste | 83   | 6.3  |
| Dalit             | 78   | 5.9  |
| <b>Religion</b>   |      |      |
| Hindu             | 1038 | 79.1 |
| Buddhist          | 126  | 9.6  |
| Kirat             | 80   | 6.1  |
| Others            | 68   | 5.2  |

---

Of the respondents' fathers who were alive, majority (34.2%) were involved in business. Almost four-fifths (80.5%) of the respondent's mothers who were alive were housewives and farmers.

The prevalence of tobacco use (one who has ever used any tobacco product) was estimated to be 19.7%. The prevalence among males and females was 33.6% and 4.0% respectively. The prevalence of current smoking was 13.9% whereas that of current use of chewable tobacco was 6% in our study. (Table 2)

**Table 2: Tobacco consumption among the adolescent students in Dharan, Sunsari**

| <b>Tobacco consumption status</b>           | <b>Male (n=694)<br/>% (C.I.*)</b> | <b>Female (n=618)<br/>% (C.I.*)</b> | <b>Total (N=1312)<br/>% (C.I.*)</b> |
|---------------------------------------------|-----------------------------------|-------------------------------------|-------------------------------------|
| <b>Tobacco user</b>                         | 33.6 (30.2,36.9)                  | 4.0 (2.6,5.3)                       | 19.7 (17.7, 21.6)                   |
| <b>Current smoker</b>                       | 24.8 (21.5,28.0)                  | 1.6 (0.6,2.5)                       | 13.9 (12.1,15.6)                    |
| <b>Currently using<br/>chewable tobacco</b> | 10.4 (8.2,12.5)                   | 1.1 (0.3,1.8)                       | 6.0 (4.7,7.2)                       |

\* *C.I. = 95% Confidence intervals*

Table 3 depicts that the mean age of initiating tobacco smoking was 13.79 years (SD = 2.21) whereas that of initiating tobacco chewing was 13.58 years (SD = 2.11). More than half of the users (51.9%) preferred to consume tobacco in public places followed by friend's house (14%). Almost a third (75.6%) of the users purchased tobacco directly from the shops. This study found the median expenditure on tobacco to be Nepalese Rupees (NRs). 100 per month (Inter-quartile range 30-200) (NRs. 3.33 or 0.037 United States Dollar per day), which was one fifth of their pocket money (Median 500, Inter-quartile range 300-1000).

In the bivariate analysis, proportion of tobacco use increased significantly with age and higher amount of pocket money received monthly. Tobacco use was significantly associated with gender, grade, caste, type of family, father's occupation and awareness regarding Framework Convention on Tobacco Control (FCTC).(Table 3)

Table 3: Different characteristics of participants and tobacco use: a bivariate analysis

| Characteristics                     | Tobacco User N(%) | Tobacco Non User N(%) | p value |
|-------------------------------------|-------------------|-----------------------|---------|
| <b>Age Group (years)</b>            |                   |                       |         |
| 14-15                               | 87 (13.4)         | 561 (86.6)            | <0.001  |
| 16-19                               | 171 (25.8)        | 493 (74.2)            |         |
| <b>Gender</b>                       |                   |                       |         |
| Male                                | 233 (33.6)        | 461 (66.4)            | <0.001  |
| Female                              | 25 (4.0)          | 593 (96.0)            |         |
| <b>Grade</b>                        |                   |                       |         |
| 9                                   | 82 (14.9)         | 469 (85.1)            | <0.001  |
| 10                                  | 116 (27.5)        | 306 (72.5)            |         |
| 11                                  | 29 (16.7)         | 145 (83.3)            |         |
| 12                                  | 31 (18.8)         | 134 (81.2)            |         |
| <b>Caste/Ethnicity</b>              |                   |                       |         |
| Brahmin / Chhetri                   | 49 (14.6)         | 286 (85.4)            | <0.001  |
| Janajati                            | 189 (23.2)        | 627 (76.8)            |         |
| Dalit                               | 14 (17.9)         | 64 (82.1)             |         |
| Terai Major Caste                   | 6 (7.2)           | 77 (92.8)             |         |
| <b>Type of Family</b>               |                   |                       |         |
| Nuclear                             | 161 (18.1)        | 727 (81.9)            | 0.043   |
| Joint                               | 97 (22.9)         | 327 (77.1)            |         |
| <b>Father's Occupation (n=1269)</b> |                   |                       |         |

|                                  |            |            |                  |
|----------------------------------|------------|------------|------------------|
| Foreign/Skilled/Semi Skilled     | 97 (25.1)  | 290 (74.9) | <b>0.002</b>     |
| Rtd.Army/Unemployed              | 16 (27.1)  | 43 (72.9)  |                  |
| Army/Service/Professional        | 49 (16.6)  | 247 (83.4) |                  |
| Business                         | 67 (15.4)  | 367 (84.6) |                  |
| Farmer                           | 23 (24.7)  | 70 (75.3)  |                  |
| <b>Pocket Money/month (NRs.)</b> |            |            |                  |
| <500                             | 102 (16.6) | 511 (83.4) | <b>0.010</b>     |
| ≥500                             | 156 (22.3) | 543 (77.7) |                  |
| <b>Awareness of FCTC</b>         |            |            |                  |
| Present                          | 54 (30.0)  | 126 (70.0) | <b>&lt;0.001</b> |
| Absent                           | 204 (18.0) | 928 (82.0) |                  |

Students in late adolescence (16-19 years) were nearly twice as likely to be tobacco users compared to middle adolescence (14-15 years) (OR= 1.92, CI=1.28, 2.90). Male students were 11.5 times more likely to use tobacco compared to females (OR= 11.59, CI= 7.44, 18.05). The students belonging to Janajati ethnicity were more than twice likely to be users of tobacco compared to those who were Brahmin/Chhetris (OR=2.11, CI=1.43, 3.11). The adolescents who received pocket money of more than or equal to NRs.500 per month had nearly 1.5 times more chances of using tobacco compared to those who received less than NRs.500 per month (OR= 1.47, CI= 1.06, 2.05). (Table 4)

**Table 4: Association of different variables with tobacco habit of adolescent students: a multivariate analysis (N=1312)**

| Characteristics          | Odds Ratio (95% CI)        |
|--------------------------|----------------------------|
| <b>Age Group (years)</b> |                            |
| 14-15                    | 1.00                       |
| 16-19                    | <b>1.92 (1.28,2.90)</b>    |
| <b>Gender</b>            |                            |
| Female                   | 1.00                       |
| Male                     | <b>11.59 (7.44, 18.05)</b> |
| <b>Grade</b>             |                            |
| 9                        | 1.00                       |
| 10                       | 1.44 (0.95, 2.17)          |
| 11                       | <b>0.51 (0.27, 0.93)</b>   |
| 12                       | 0.67 (0.37, 1.23)          |
| <b>Ethnicity</b>         |                            |
| Brahmin/Chhetri          | 1.00                       |
| Janajati                 | <b>2.11 (1.43, 3.11)</b>   |
| Dalit                    | 1.71 (0.83, 3.54)          |
| Terai Major Caste        | 0.48 (0.19, 1.22)          |
| <b>Type of Family</b>    |                            |
| Joint                    | 1.00                       |
| Nuclear                  | 0.73 (0.52, 1.01)          |

**Pocket Money per month**

|      |                          |
|------|--------------------------|
| <500 | 1.00                     |
| ≥500 | <b>1.47 (1.06, 2.05)</b> |

---

*-2 Log likelihood=1001.860, Chi-square=11.015, df=8, p=0.201*

**Discussion**

The WHO has defined the adolescents as persons in the 10 to 19 years age group. It has also estimated that 70% of premature deaths among adults are due to behavioural patterns that emerge in adolescence including smoking, violence and sexual behaviour. Studies have that such risk taking behaviours begin to manifest from the middle adolescence (14-15 years of age) onwards.[8] The present study therefore, focussed on the specific group of middle and late adolescents.

The mean age of participants was 15.70 years which was higher than National GYTS in Nepal in 2007 which included subjects from 13-15 years age group only. Almost equal proportion of male (52.9%) and female (47.1%) students were involved in our study which is similar to the participation in the study conducted in Pokhara, Nepal.[9] Participants belonging to Rai, Limbu and Newar ethnicity were more in this study which might have accounted for the higher proportion of Janajatis unlike other studies.[9]

The prevalence of tobacco use in this study was 19.7% which was more compared to similar study from western Nepal.[7] This burden was more than eight times more in the boys (33.6%) as compared to girls (4%). Similar difference of prevalence between the genders was seen in other studies conducted in Nepal and abroad.[8-11] This highlights the fact that although in most

1  
2  
3 developing countries boys continue to smoke at a higher rate than girls, the rates in girls are in a  
4  
5 rising trend.  
6  
7

8  
9 The mean (SD) age for tobacco use initiation in our study was found to be 13.79 (2.21) years and  
10  
11 13.58 (2.11) years for smoking and chewing tobacco respectively. This is in consistency with  
12  
13 studies from Kathmandu, Noida, and Kerala India where the mean ages of onset were 14.15 (SD  
14  
15 2.62), 12.4 and 13.2 years respectively.[12-14] Early and middle adolescence is more vulnerable  
16  
17 for initiation of tobacco use hence, a target group is highlighted for early intervention to reduce  
18  
19 the uptake of this habit.  
20  
21  
22

23  
24 Our study has shown that more than half (51%) of the adolescent tobacco users prefer public  
25  
26 places as their most common location of tobacco use and shops as the most common source  
27  
28 (75.6%). Similar results have been obtained in the study from Pokhara, Nepal which showed that  
29  
30 most of the respondents (66.7%) smoked in public places like tea stalls or restaurants and  
31  
32 majority purchased it from the shops.[7] According to a study from Kerala, India, the most  
33  
34 preferred places for smoking were friends' house and public places.[6] Provision of unrestricted  
35  
36 access to tobacco products in the shops especially to the adolescents including minors, and its  
37  
38 open use in public places pose a great challenge to the effective implementation of the  
39  
40 regulations of the anti tobacco law in Nepal.  
41  
42  
43  
44

45  
46 We found that students in late adolescence were nearly two times more likely to consume  
47  
48 tobacco compared to those in middle adolescence. Similar results were seen in other studies  
49  
50 where students aged 16 years and above were nearly three times more likely to be tobacco users  
51  
52 compared to those who were 13 years old (Adjusted OR=2.9, CI=1.6-5.3).[6] The burden of  
53  
54  
55  
56  
57  
58  
59  
60



1  
2  
3 tobacco use is more likely in later adolescence thus cessation attempts need to be focused in  
4  
5 these groups.  
6  
7

8  
9 There was a huge gap in the likelihood of using tobacco among males and females after  
10 regression analysis in this study. Other studies have also reported similar discrepancies.[5,7,10]

11  
12 Tobacco use can be considered as part of a constellation of risk-taking behaviors that is more  
13 prevalent in the males.[15]  
14  
15

16  
17  
18 Jajajatis were two times more likely to consume tobacco compared to Brahmins/Chhetris in our  
19 study. Tobacco chewing was significantly more among the hill native castes which included Rai,  
20 Limbu, Magar, Tamang, Gurung whereas smoking was significantly higher among the hill  
21 occupational castes which included Biswakarma, Pariyar and Sarki in a study conducted among  
22 females population of Dharan.[16] Nepal Adolescent and Youth Survey (NAYS) in 2010 showed  
23 similar results in which relatively advantaged Janajati had higher prevalence of liquor (32.60%)  
24 and tobacco use (16.62%) followed by disadvantaged Janajatis (27.83% and 13.71%  
25 respectively).[17] The population of hill region is more diverse than the Terai region in its  
26 ethnic, caste, and religious composition and the attitude towards smoking is more permissive  
27 among the people from the hills.[18] This might be a possible explanation for the higher  
28 prevalence of tobacco use seen among the Janajatis in various studies across the nation including  
29 ours.  
30  
31  
32  
33  
34  
35  
36  
37  
38  
39  
40  
41  
42  
43  
44  
45  
46  
47

48 Adolescents who received more than or equal to NRs. 500 as pocket money were nearly 1.5  
49 times more likely to be tobacco users as compared to those who received less. Greater likelihood  
50 of being tobacco user with higher amount of pocket money was reflected in other studies as  
51  
52  
53  
54  
55  
56  
57  
58  
59  
60

1  
2  
3 well.[5,6] Having some amount of disposable money at hand might predispose the adolescents  
4  
5 towards use of tobacco by easing the access.  
6  
7

8  
9 Our study had few limitations. Even though the participation in the study was entirely voluntary  
10  
11 with an assurance of non disclosure of identity and confidentiality, chances of bias may occur in  
12  
13 the findings as the data was collected through self administered questionnaire. The assessment of  
14  
15 the tobacco use status was based entirely upon the response given by the subject and not  
16  
17 validated by biomarkers. However, the use of standard questionnaire and a large sample size  
18  
19 enabled our study for comparison with other national and international studies and generalization  
20  
21 to adolescent students of this municipality. It also reflects the burden of tobacco in a rapidly  
22  
23 urbanizing town of Eastern Nepal post legalization of anti-tobacco law and stresses urgent need  
24  
25 to address the target group.  
26  
27  
28

### 29 30 31 **Conclusion**

32  
33  
34 The study revealed significant burden of tobacco use among the adolescents despite the existence  
35  
36 of anti-tobacco regulations in the country. Late adolescence, male gender, Janajati ethnicity and  
37  
38 higher pocket money were significantly associated with tobacco use. Taking these factors into  
39  
40 consideration, tobacco focussed interventions should target vulnerable groups to prevent uptake  
41  
42 of the habit and support abstinence among the users. An effective implementation of Tobacco  
43  
44 Control and Regulatory Act 2010 is the urgent need of the country.  
45  
46  
47

### 48 49 **Competing Interests**

50  
51  
52 The author(s) declare that they have no competing interests.  
53  
54

### 55 56 **Acknowledgement**

1  
2  
3 Our sincere appreciation goes to all the students who agreed to participate in this study and the  
4  
5 respected principals of the schools who allowed me to conduct this study by lending their  
6  
7 valuable time  
8  
9

### 10 11 **Contributorship statement** 12

13  
14 Dr. Pranil Man Singh Pradhan was involved in designing the protocol, collection, entering and  
15  
16 analysis of data and preparation of the final document. Prof. Paras Kumar Pokharel was  
17  
18 responsible for the overall review of the protocol and final report and provided critical analysis  
19  
20 where needed. Dr. Surya Raj Niraula assisted in data entry and analysis and concentrated on  
21  
22 presentation of the results. Dr. Anup Ghimire and Dr. Suman Bahadur Singh were involved in  
23  
24 the critical review of the final report and provided necessary feedback.  
25  
26  
27  
28

### 29 30 **What this paper adds** 31

32  
33 This study highlights upon the burden of tobacco use that still exists among the adolescent  
34  
35 students despite the endorsement of anti tobacco law in Nepal in 2011.  
36  
37  
38  
39

40  
41 Ethnicity was significantly associated with tobacco use as adolescent students belonging to  
42  
43 Janajati ethnicity had greater likelihood of using tobacco products compared to  
44  
45 Brahmins/Chhetris.  
46  
47

### 48 49 **Data sharing statement** 50

51  
52 Extra data is available by emailing Dr. Pranil Man Singh Pradhan (pranil.pradhan@gmail.com)  
53  
54  
55  
56  
57  
58  
59  
60

## References

1. Detels R, Beaglehole R, Lansang MA et al. Oxford Textbook of Public Health. Oxford University Press 2009
2. Warren CW, Jones NR, Eriksen MP et al for the Global Tobacco Surveillance System (GTSS) collaborative group. Patterns of global tobacco use in young people and implications for future chronic disease burden in adults. *Lancet* 2006;367:749-753
3. WHO. Office for South-East Asia (SEARO). Profile on Implementation of WHO Framework Convention on Tobacco Control in the South-East Asia Region. New Delhi, India. 2011
4. Pandey MR, Pathak RP, Shrestha S et al. National Global Youth Tobacco Survey (GYTS) and National Global School Personnel Survey (GSPS) in Nepal 2007
5. Rachiotis G, Muula AS, Rudatsikira E et al. Factors associated with adolescent cigarette smoking in Greece: Results from a cross sectional study (GYTS Study). *BMC Public Health* 2008;8:313
6. Mohan S, Sarma PS, Thankappan KR. Access to Pocket money and low educational performance predict tobacco use among adolescent boys in Kerala, India. *Preventive Medicine* 2005;41:685-692
7. Sreeramareddy CT, Kishore PV, Paudel J et al. Prevalence, distribution and correlates of tobacco smoking and chewing in Nepal: a secondary data analysis of Nepal Demographic and Health Survey-2006. *Subst Abuse Treat Prev Policy* 2011;6(33)

- 1  
2  
3  
4  
5  
6  
7  
8  
9  
10  
11  
12  
13  
14  
15  
16  
17  
18  
19  
20  
21  
22  
23  
24  
25  
26  
27  
28  
29  
30  
31  
32  
33  
34  
35  
36  
37  
38  
39  
40  
41  
42  
43  
44  
45  
46  
47  
48  
49  
50  
51  
52  
53  
54  
55  
56  
57  
58  
59  
60
8. Sharma R, Grover VL, Chaturvedi S. Tobacco Use Among Adolescent Students and the Influence of Role Models. *Indian J Community Med* 2010;35(2)
  9. Paudel D, Pathak RP. Tobacco Use among Adolescent Students in Secondary Schools of Pokhara Sub Metropolitan City. *J Nepal Health Res Counc* 2003;1(2)
  10. Kapoor SK, Anand K, Kumar G. Prevalence of Tobacco Use Among School and College Going Adolescents of Haryana. *Indian J Pediatr* 1995;62:461-466
  11. Soteriades ES, Spanoudis G, Talias MA et al. Children's loss of autonomy over smoking: the global youth tobacco survey. *Tob Control* 2011;20:201-206
  12. Aryal UR, Deuba K, Subedi A et al. Prevalence and Determinants of Cigarette Students of Kathmandu Valley. *Asian Journal of Medical Sciences* 2010;1:53-58
  13. Narain R, Sardana S, Gupta S et al. Age at initiation & prevalence of tobacco use among school children in Noida, India: A cross-sectional questionnaire based survey. *Indian J Med Res* 2011;133(3):300-307
  14. Pradeepkumar AS, Mohan S, Gopalakrishnan P et al. Tobacco use in Kerala: findings from three recent studies. *Natl Med J India* 2005;18:148-153
  15. WHO. What about boys: A literature review on the health and development of adolescent boys. Geneva: WHO:2002
  16. Niraula SR. Tobacco Use among Women in Dharan, Eastern Nepal. *J Health Popul Nutr* 2004;22(1):68-74

1  
2  
3  
4  
5  
6  
7  
8  
9  
10  
11  
12  
13  
14  
15  
16  
17  
18  
19  
20  
21  
22  
23  
24  
25  
26  
27  
28  
29  
30  
31  
32  
33  
34  
35  
36  
37  
38  
39  
40  
41  
42  
43  
44  
45  
46  
47  
48  
49  
50  
51  
52  
53  
54  
55  
56  
57  
58  
59  
60

17. Population Division Government of Nepal Ministry of Health and Population. Nepal Adolescent and Youth Survey 2010/11 Highlights

18. Chloe MK, Kiting AS, Lin HS et al. The Youth Tobacco Epidemic in Asia. *East-West Center Working Papers Population Series* 2001;108-117

For peer review only

**STROBE 2007 (v4) checklist of items to be included in reports of observational studies in epidemiology\***  
**Checklist for cohort, case-control, and cross-sectional studies (combined)**

| Section/Topic             | Item # | Recommendation                                                                                                                                                                                                                                                                                                                                                                                                                                                         | Reported on page # |
|---------------------------|--------|------------------------------------------------------------------------------------------------------------------------------------------------------------------------------------------------------------------------------------------------------------------------------------------------------------------------------------------------------------------------------------------------------------------------------------------------------------------------|--------------------|
| Title and abstract        | 1      | (a) Indicate the study's design with a commonly used term in the title or the abstract                                                                                                                                                                                                                                                                                                                                                                                 | 3                  |
|                           |        | (b) Provide in the abstract an informative and balanced summary of what was done and what was found                                                                                                                                                                                                                                                                                                                                                                    | 3-4                |
| <b>Introduction</b>       |        |                                                                                                                                                                                                                                                                                                                                                                                                                                                                        |                    |
| Background/rationale      | 2      | Explain the scientific background and rationale for the investigation being reported                                                                                                                                                                                                                                                                                                                                                                                   | 5                  |
| Objectives                | 3      | State specific objectives, including any pre-specified hypotheses                                                                                                                                                                                                                                                                                                                                                                                                      | 6                  |
| <b>Methods</b>            |        |                                                                                                                                                                                                                                                                                                                                                                                                                                                                        |                    |
| Study design              | 4      | Present key elements of study design early in the paper                                                                                                                                                                                                                                                                                                                                                                                                                | 6                  |
| Setting                   | 5      | Describe the setting, locations, and relevant dates, including periods of recruitment, exposure, follow-up, and data collection                                                                                                                                                                                                                                                                                                                                        | 6-7                |
| Participants              | 6      | (a) <i>Cohort study</i> —Give the eligibility criteria, and the sources and methods of selection of participants. Describe methods of follow-up<br><i>Case-control study</i> —Give the eligibility criteria, and the sources and methods of case ascertainment and control selection. Give the rationale for the choice of cases and controls<br><i>Cross-sectional study</i> —Give the eligibility criteria, and the sources and methods of selection of participants | 6                  |
|                           |        | (b) <i>Cohort study</i> —For matched studies, give matching criteria and number of exposed and unexposed<br><i>Case-control study</i> —For matched studies, give matching criteria and the number of controls per case                                                                                                                                                                                                                                                 |                    |
| Variables                 | 7      | Clearly define all outcomes, exposures, predictors, potential confounders, and effect modifiers. Give diagnostic criteria, if applicable                                                                                                                                                                                                                                                                                                                               | 7                  |
| Data sources/ measurement | 8*     | For each variable of interest, give sources of data and details of methods of assessment (measurement). Describe comparability of assessment methods if there is more than one group                                                                                                                                                                                                                                                                                   | 6-7                |
| Bias                      | 9      | Describe any efforts to address potential sources of bias                                                                                                                                                                                                                                                                                                                                                                                                              | 7                  |
| Study size                | 10     | Explain how the study size was arrived at                                                                                                                                                                                                                                                                                                                                                                                                                              | 6                  |
| Quantitative variables    | 11     | Explain how quantitative variables were handled in the analyses. If applicable, describe which groupings were chosen and why                                                                                                                                                                                                                                                                                                                                           | 7                  |
| Statistical methods       | 12     | (a) Describe all statistical methods, including those used to control for confounding                                                                                                                                                                                                                                                                                                                                                                                  | 7                  |
|                           |        | (b) Describe any methods used to examine subgroups and interactions                                                                                                                                                                                                                                                                                                                                                                                                    | 7                  |
|                           |        | (c) Explain how missing data were addressed                                                                                                                                                                                                                                                                                                                                                                                                                            | 8                  |
|                           |        | (d) <i>Cohort study</i> —If applicable, explain how loss to follow-up was addressed<br><i>Case-control study</i> —If applicable, explain how matching of cases and controls was addressed                                                                                                                                                                                                                                                                              |                    |

|                          |     |                                                                                                                                                                                                              |       |
|--------------------------|-----|--------------------------------------------------------------------------------------------------------------------------------------------------------------------------------------------------------------|-------|
|                          |     | <i>Cross-sectional study</i> —If applicable, describe analytical methods taking account of sampling strategy                                                                                                 |       |
|                          |     | (e) Describe any sensitivity analyses                                                                                                                                                                        |       |
| <b>Results</b>           |     |                                                                                                                                                                                                              |       |
| Participants             | 13* | (a) Report numbers of individuals at each stage of study—eg numbers potentially eligible, examined for eligibility, confirmed eligible, included in the study, completing follow-up, and analysed            | 8     |
|                          |     | (b) Give reasons for non-participation at each stage                                                                                                                                                         | 8     |
|                          |     | (c) Consider use of a flow diagram                                                                                                                                                                           |       |
| Descriptive data         | 14* | (a) Give characteristics of study participants (eg demographic, clinical, social) and information on exposures and potential confounders                                                                     | 8-9   |
|                          |     | (b) Indicate number of participants with missing data for each variable of interest                                                                                                                          |       |
|                          |     | (c) <i>Cohort study</i> —Summarise follow-up time (eg, average and total amount)                                                                                                                             |       |
| Outcome data             | 15* | <i>Cohort study</i> —Report numbers of outcome events or summary measures over time                                                                                                                          |       |
|                          |     | <i>Case-control study</i> —Report numbers in each exposure category, or summary measures of exposure                                                                                                         |       |
|                          |     | <i>Cross-sectional study</i> —Report numbers of outcome events or summary measures                                                                                                                           | 10    |
| Main results             | 16  | (a) Give unadjusted estimates and, if applicable, confounder-adjusted estimates and their precision (eg, 95% confidence interval). Make clear which confounders were adjusted for and why they were included | 10-12 |
|                          |     | (b) Report category boundaries when continuous variables were categorized                                                                                                                                    |       |
|                          |     | (c) If relevant, consider translating estimates of relative risk into absolute risk for a meaningful time period                                                                                             |       |
| Other analyses           | 17  | Report other analyses done—eg analyses of subgroups and interactions, and sensitivity analyses                                                                                                               | 13-14 |
| <b>Discussion</b>        |     |                                                                                                                                                                                                              |       |
| Key results              | 18  | Summarise key results with reference to study objectives                                                                                                                                                     | 14-16 |
| Limitations              | 19  | Discuss limitations of the study, taking into account sources of potential bias or imprecision. Discuss both direction and magnitude of any potential bias                                                   | 17    |
| Interpretation           | 20  | Give a cautious overall interpretation of results considering objectives, limitations, multiplicity of analyses, results from similar studies, and other relevant evidence                                   | 17    |
| Generalisability         | 21  | Discuss the generalisability (external validity) of the study results                                                                                                                                        | 17    |
| <b>Other information</b> |     |                                                                                                                                                                                                              |       |
| Funding                  | 22  | Give the source of funding and the role of the funders for the present study and, if applicable, for the original study on which the present article is based                                                |       |

\*Give information separately for cases and controls in case-control studies and, if applicable, for exposed and unexposed groups in cohort and cross-sectional studies.  
**Note:** An Explanation and Elaboration article discusses each checklist item and gives methodological background and published examples of transparent reporting. The STROBE checklist is best used in conjunction with this article (freely available on the Web sites of PLoS Medicine at <http://www.plosmedicine.org/>, Annals of Internal Medicine at <http://www.annals.org/>, and Epidemiology at <http://www.epidem.com/>). Information on the STROBE Initiative is available at [www.strobe-statement.org](http://www.strobe-statement.org).





**Tobacco Use and Associated Factors among Adolescent Students in Dharan: A Cross Sectional Study**

|                                 |                                                                                                                                                                                                                                                                                                                                                                                                                                                                                                                                                         |
|---------------------------------|---------------------------------------------------------------------------------------------------------------------------------------------------------------------------------------------------------------------------------------------------------------------------------------------------------------------------------------------------------------------------------------------------------------------------------------------------------------------------------------------------------------------------------------------------------|
| Journal:                        | <i>BMJ Open</i>                                                                                                                                                                                                                                                                                                                                                                                                                                                                                                                                         |
| Manuscript ID:                  | bmjopen-2012-002123.R1                                                                                                                                                                                                                                                                                                                                                                                                                                                                                                                                  |
| Article Type:                   | Research                                                                                                                                                                                                                                                                                                                                                                                                                                                                                                                                                |
| Date Submitted by the Author:   | 05-Nov-2012                                                                                                                                                                                                                                                                                                                                                                                                                                                                                                                                             |
| Complete List of Authors:       | Pradhan, Pranil; B.P.Koirala Institute of Health Sciences, School of Public Health and Community Medicine<br>Pokharel, Paras; B.P.Koirala Institute of Health Sciences, School of Public Health and Community Medicine<br>Niraula, Surya; B.P.Koirala Institute of Health Sciences, School of Public Health and Community Medicine<br>Ghimire, Anup; B.P.Koirala Institute of Health Sciences, School of Public Health and Community Medicine<br>Singh, Suman; B.P.Koirala Institute of Health Sciences, School of Public Health and Community Medicine |
| <b>Primary Subject Heading</b>: | Public health                                                                                                                                                                                                                                                                                                                                                                                                                                                                                                                                           |
| Secondary Subject Heading:      | Smoking and tobacco                                                                                                                                                                                                                                                                                                                                                                                                                                                                                                                                     |
| Keywords:                       | PUBLIC HEALTH, Substance misuse < PSYCHIATRY, PREVENTIVE MEDICINE                                                                                                                                                                                                                                                                                                                                                                                                                                                                                       |
|                                 |                                                                                                                                                                                                                                                                                                                                                                                                                                                                                                                                                         |

SCHOLARONE™  
Manuscripts

Only

**Title:** Tobacco Use and Associated Factors among Adolescent Students in Dharan: A Cross Sectional Study

**Corresponding Author:**

Dr. Prnil Man Singh Pradhan

Junior Resident

School of Public Health and Community Medicine

B.P. Koirala Institute of Health Sciences (BPKIHS)

Dharan, Nepal

Phone: 9771025-525555-2626

P.O. Box 7053

Email: prnil.pradhan@gmail.com

**Co authors:**

|    | <b>Co authors' Name</b>  | <b>Designation</b>   | <b>Department</b>                                                     |
|----|--------------------------|----------------------|-----------------------------------------------------------------------|
| 1. | Dr. Paras Kumar Pokharel | Professor and Chief  | School of Public Health and Community Medicine, BPKIHS, Dharan, Nepal |
| 2. | Dr. Surya Raj Niraula    | Additional Professor | School of Public Health and Community Medicine, BPKIHS, Dharan, Nepal |
| 3. | Dr. Anup Ghimire         | Associate Professor  | School of Public Health and Community Medicine, BPKIHS, Dharan, Nepal |
| 4. | Dr. Suman Bahadur Singh  | Associate Professor  | School of Public Health and Community Medicine, BPKIHS, Dharan, Nepal |

**Keywords:** tobacco use, adolescent students, Nepal

**Word Count:** 2862

## Article Summary

### 1. Article focus

- What is the burden of tobacco use among the adolescent students of Dharan post legalization of anti tobacco directives in Nepal?
- What factors are likely to aggravate this burden among the students?

### 2. Key messages

- Significant burden of tobacco use exists among the adolescent students of Dharan despite the existence of anti-tobacco regulations in the country.
- Tobacco focussed interventions should target vulnerable groups to prevent uptake of the habit and support abstinence among the users taking the factors found significant in this study

### 3. Strengths

- Use of a standard questionnaire and a large sample enabled our study for comparison with other national and international studies

### 4. Limitations

- Since tobacco use was assessed by self administered questionnaire, chances of bias in responses exist.
- Tobacco use status was not validated by biomarkers in our study.

1  
2  
3 **Tobacco Use and Associated Factors among Adolescent Students in Dharan: A Cross**  
4  
5 **Sectional Study**  
6  
7

8  
9 Pradhan PMS<sup>1</sup>, Pokharel PK<sup>2</sup>, Niraula SR<sup>3</sup>, Ghimire A<sup>4</sup>, Singh SB<sup>5</sup>  
10

11  
12 (<sup>1</sup>Junior Resident, <sup>2</sup> Professor, <sup>3</sup> Additional Professor, <sup>4</sup> Associate Professor, <sup>5</sup> Associate  
13  
14 Professor, School of Public Health and Community Medicine, BPKIHS)  
15  
16

17  
18 **Abstract**  
19

20  
21 **Introduction:** The tobacco use among the youth, in both smoking and smokeless forms, is quite  
22  
23 high in the South East Asia region. Tobacco use is a major proven risk factor and contributes  
24  
25 substantially to the rising epidemic of non communicable diseases.  
26  
27

28  
29 **Objectives:** To explore the burden of tobacco use and its associated factors among adolescent  
30  
31 students of Dharan municipality  
32  
33

34  
35 **Design:** Cross sectional  
36  
37

38  
39 **Setting:** Secondary and higher secondary schools of Dharan municipality in Sunsari district of  
40  
41 Nepal  
42

43  
44 **Participants:** Students in middle and late adolescence (aged 14-19 years) from grades 9, 10, 11  
45  
46 and 12 were included. Out of the total sample of 1454, 1312 students completed the  
47  
48 questionnaires giving the response rate of 90.23%.  
49  
50

51  
52 **Primary outcome measure:** Tobacco use which was defined as one who has ever used any  
53  
54 tobacco product.  
55  
56

1  
2  
3 **Methodology:** Self administered questionnaire adapted from Global Youth Tobacco Survey was  
4 used to assess tobacco use among the representative sample of 1312 adolescent students in  
5  
6 Dharan from July 2011 to July 2012 using stratified random sampling  
7  
8  
9

10  
11 **Results:** Prevalence of ever use of any tobacco product was 19.7%. More than half of the  
12 tobacco users (51.9%) preferred to consume tobacco in public places whereas almost a third  
13 (75.6%) of the consumers purchased tobacco directly from the shops. Multivariate analysis  
14 showed that tobacco use was associated with late adolescence (OR: 1.92; 95%CI: 1.28-2.90),  
15 male gender (OR: 11.59; 95%CI: 7.44-18.05), Janajati ethnicity (OR: 2.11; 95%CI: 1.43-3.11)  
16 and having pocket money of more than or equal to NRs.500 per month (OR: 1.47; 95%CI: 1.06-  
17 2.05).  
18  
19  
20  
21  
22  
23  
24  
25  
26  
27

28 **Conclusion:** Tobacco focussed interventions are required for school/college going students in  
29 order to promote cessation among users and prevent initiation, focusing on the significant factors  
30 found by this study. Further researches are needed to explore the vulnerability of certain ethnic  
31 groups towards tobacco use to generate an effective awareness campaign.  
32  
33  
34  
35  
36  
37  
38  
39  
40  
41  
42  
43  
44  
45  
46  
47  
48  
49  
50  
51  
52  
53  
54  
55  
56  
57  
58  
59  
60

## Introduction

Nearly 70% of the world's smokers live in low and middle income countries. Nearly two-thirds of the world's smokers live in 10 countries, namely China, India, Indonesia, Russian Federation, the United States, Japan, Brazil, Bangladesh, Germany and Turkey. [1] Unless a large number of current smokers in developing countries quit, it is estimated that smoking will be causing 10 million deaths per year worldwide by the 2020s or early 2030s, of which 7 million will be in developing countries. [2]

The tobacco use among the youth, in both smoking and smokeless forms, is quite high in the South East Asia region including Nepal the major reason being the creative and targeted marketing strategies of various tobacco companies and its weak regulation. Abundant tobacco production, weak enforcement of tobacco control measures and easy accessibility and affordability of these products are other factors leading to the rise of the epidemic in the youth.[3] Although the exact burden of tobacco use among the youth has not been studied extensively in Nepal, a national Global Youth Tobacco Survey (GYTS) in 2007 reported that overall 7-9% of the students ever smoked cigarettes, even 1 or 2 puffs.[4] Some of the factors known to be associated with tobacco use among adolescents are age, gender, having smoker friends or parents and the amount of pocket money.[5-7]

The Government of Nepal had signed the Framework Convention on Tobacco Control (FCTC) on December 3, 2003 followed by its ratification by the House of Representatives on November 7, 2006. In what was regarded as a landmark in the nation's campaign against tobacco, the government finally assented to the anti-tobacco directives of Tobacco Product Control and Regulatory Act 2010 on November 4, 2011. This has reflected a strong will from the side of the

1  
2  
3 government to comply by objectives set out in the convention. However, the implementation of  
4 the anti-tobacco directives has not been experienced to the fullest. A need was felt to explore this  
5 burden and the associated factors within the Nepalese youth who are the most vulnerable for  
6 adoption of this habit and continuation, in a town of Sunsari district in the background of recent  
7 endorsement of anti-tobacco directives by the government.  
8  
9  
10  
11  
12  
13

## 14 15 16 **Methods**

17  
18  
19 This was a comparative cross sectional study conducted in Dharan Municipality of Sunsari  
20 district of Nepal from July 2011 to July 2012. It was shown in a study from South Delhi that the  
21 overall prevalence of tobacco use (smoking and smokeless forms) was 20.9%. [8] We calculated  
22 the minimum sample size to estimate the prevalence for 95% confidence limits at an allowable  
23 error of 10% to be 1454 individuals.  
24  
25  
26  
27  
28  
29

30  
31  
32 Students in middle and late adolescence (aged 14-19 years) from grades 9, 10, 11 and 12 in  
33 different schools of Dharan Municipality were included in this study. Current list of schools in  
34 Dharan was obtained from Private and Boarding School's Organization, Nepal (PABSON). From  
35 the list of 87 schools (private and government), stratified random sampling with proportionate  
36 allocation technique based on population size was carried out. This was followed by random  
37 selection of classes from the selected schools. All the students from the selected classes were  
38 included in the study.  
39  
40  
41  
42  
43  
44  
45  
46  
47  
48

49 Data collection was carried out using a self administered questionnaire adapted from Global  
50 Youth Tobacco Survey (2001) containing questions regarding socio-demographic profile,  
51 parental occupation, having heard about FCTC and pocket money received per month. The  
52  
53  
54  
55  
56  
57  
58  
59  
60

1  
2  
3 questionnaire to be used was pretested among the adolescent students in a different area (Itahari)  
4  
5 and necessary corrections and modifications were made in order to make it more understandable  
6  
7  
8 for the students. An elaborative briefing on the questionnaire was done to all the students of the  
9  
10 class prior to data collection. The outcome variable was tobacco use which was defined as one  
11  
12 who has ever used any tobacco product. Current tobacco use was defined as one who has used  
13  
14 tobacco product (smoking or chewing) in the past one month. Non user was the one who had  
15  
16 never consumed any tobacco product.  
17  
18

19  
20  
21 On the basis of age, participants were classified into middle (14-15 years) and late (16-19 years)  
22  
23 adolescence. The pocket money was dichotomized based on the median amount received per  
24  
25 month.  
26

27  
28 Ethical clearance was acquired from the ethical committee of B.P. Koirala Institute of Health  
29  
30 Sciences at the start of the study. Informed consent was taken from all the participants. We  
31  
32 obtained written permission from the school authorities before interaction with the students. All  
33  
34 the students present at the time of the visit were included in the study. Participation in the study  
35  
36 was entirely voluntary and full confidentiality of the responses was maintained after clear  
37  
38 explanation of the objectives of the study. Absence of any school personnel or teacher at the time  
39  
40 of data collection was ensured in order to prevent response bias.  
41  
42  
43  
44

45  
46 Collected data were entered into MS Windows Excel in the form of codes. Analysis was  
47  
48 performed using Statistical Package for Social Sciences (SPSS) 17 version. In bivariate analysis  
49  
50 with categorical variables, Chi-Square test was applied. The following potential confounders  
51  
52 were chosen based on the previous literature: age group, gender, type of school, grade, religion,  
53  
54 ethnicity, type of family, parental occupation, pocket money and having heard of FCTC.  
55  
56



Tobacco use was considered as the dependent variable. The independent variables which had p value of 20% or less in the bivariate analysis were then included for binary logistic regression analysis with backward elimination to estimate the adjusted odds ratio and 95% confidence intervals. The variables subjected to the model were age group, gender, grade, religion, ethnicity, type of family, occupation of the father, pocket money received per month and having heard about FCTC by the study participants. Goodness of fit of the model was tested by Hosmer and Lemeshow test. Probability of significance was set at 5%.

## Results

Out of the total sample, 1312 students completed the questionnaire giving the response rate of 90.23%. Among the remaining questionnaires, eighty were incomplete whereas sixty two did not match the age criteria therefore were excluded from the data analyses.

Among the participants, the mean age was 15.70 years (SD = 1.33). Proportion of students in the age group of middle adolescence (14-15 years) and late adolescence (16-19 years) were almost equal. The participation was almost equal from both the gender (Male: Female=1.1:1). Participants who were Janajati by ethnicity were predominant. Other religions comprised of Christianity, Muslim, Jainism, Sahajyog and Heavenly path or Premwaad (Lovism). (Table 1)

**Table 1: Socio-demographic characteristics of the adolescent students in Dharan, Sunsari (N=1312)**

| Characteristics          | Number | Percentage |
|--------------------------|--------|------------|
| <b>Age Group (years)</b> |        |            |
| 14-15                    | 648    | 49.4       |
|                          | 8      |            |

|                        |      |      |
|------------------------|------|------|
| 16-19                  | 664  | 50.6 |
| <b>Gender</b>          |      |      |
| Male                   | 694  | 52.9 |
| Female                 | 618  | 47.1 |
| <b>School</b>          |      |      |
| Private                | 1176 | 89.6 |
| Government             | 136  | 10.4 |
| <b>Education Level</b> |      |      |
| 9                      | 551  | 42   |
| 10                     | 422  | 32.2 |
| 11                     | 174  | 13.3 |
| 12                     | 165  | 12.6 |
| <b>Ethnicity*</b>      |      |      |
| Janajati               | 816  | 62.2 |
| Brahmin/Chhetri        | 335  | 25.5 |
| Terai Major Caste      | 83   | 6.3  |
| Dalit                  | 78   | 5.9  |
| <b>Religion</b>        |      |      |
| Hindu                  | 1038 | 79.1 |
| Buddhist/Kirat         | 206  | 15.7 |
| Others                 | 68   | 5.2  |

\*Janajati: Rai, Limbu, Magar, Newar; Brahmin/Chhetri: Baral, Neupane, Oli, Paudel  
 Terai Major Caste: Agrawal, Das, Jha, Roy, Sah, Yadav; Dalit: Bafna, Kuki, Mardi,  
 Tamli etc. [19]

Of the respondents' fathers who were alive, majority (34.2%) were involved in business. Almost four-fifths (80.5%) of the respondent's mothers who were alive were housewives and farmers.

The prevalence of tobacco use (one who has ever used any tobacco product) was estimated to be 19.7%. The prevalence among males and females was 33.6% and 4.0% respectively. The prevalence of current smoking was 13.9% whereas that of current use of chewable tobacco was 6% in our study. (Table 2)

**Table 2: Tobacco consumption among the adolescent students in Dharan, Sunsari**

| <b>Tobacco consumption status</b>           | <b>Male (n=694)<br/>% (C.I.*)</b> | <b>Female (n=618)<br/>% (C.I.*)</b> | <b>Total (N=1312)<br/>% (C.I.*)</b> |
|---------------------------------------------|-----------------------------------|-------------------------------------|-------------------------------------|
| <b>Tobacco user</b>                         | 33.6 (30.2,36.9)                  | 4.0 (2.6,5.3)                       | 19.7 (17.7, 21.6)                   |
| <b>Current smoker</b>                       | 24.8 (21.5,28.0)                  | 1.6 (0.6,2.5)                       | 13.9 (12.1,15.6)                    |
| <b>Currently using<br/>chewable tobacco</b> | 10.4 (8.2,12.5)                   | 1.1 (0.3,1.8)                       | 6.0 (4.7,7.2)                       |

\* C.I. = 95% Confidence intervals

The mean age of initiating tobacco smoking was 13.79 years (SD = 2.21) whereas that of initiating tobacco chewing was 13.58 years (SD = 2.11). More than half of the users (51.9%) preferred to consume tobacco in public places followed by friend's house (14%). Almost a third (75.6%) of the users purchased tobacco directly from the shops. This study found the median expenditure on tobacco to be Nepalese Rupees (NRs). 100 per month (Inter-quartile range 30-200) (NRs. 3.33 or 0.037 United States Dollar per day), which was one fifth of their pocket money (Median 500, Inter-quartile range 300-1000).

In the bivariate analysis, proportion of tobacco use increased significantly with age and higher amount of pocket money received monthly. Tobacco use was significantly associated with gender, grade, caste, type of family, father's occupation and having heard about Framework Convention on Tobacco Control (FCTC).(Table 3)

**Table 3: Different characteristics of participants and tobacco use: a bivariate analysis**

| Characteristics          | Tobacco User N(%) | Tobacco Non User N(%) | p value |
|--------------------------|-------------------|-----------------------|---------|
| <b>Age Group (years)</b> |                   |                       |         |
| 14-15                    | 87 (13.4)         | 561 (86.6)            | <0.001  |
| 16-19                    | 171 (25.8)        | 493 (74.2)            |         |
| <b>Gender</b>            |                   |                       |         |
| Male                     | 233 (33.6)        | 461 (66.4)            | <0.001  |
| Female                   | 25 (4.0)          | 593 (96.0)            |         |
| <b>Type of School</b>    |                   |                       |         |
| Private                  | 230 (19.6)        | 946 (80.4)            | 0.775   |
| Government               | 28 (20.6)         | 108 (79.4)            |         |
| <b>Grade</b>             |                   |                       |         |
| 9                        | 82 (14.9)         | 469 (85.1)            | <0.001  |
| 10                       | 116 (27.5)        | 306 (72.5)            |         |
| 11                       | 29 (16.7)         | 145 (83.3)            |         |
| 12                       | 31 (18.8)         | 134 (81.2)            |         |
| <b>Religion</b>          |                   |                       |         |
| Hindu                    | 196 (18.9)        | 842 (81.1)            | 0.063   |

|                                      |                   |                   |                  |
|--------------------------------------|-------------------|-------------------|------------------|
| <b>Buddhist / Kirat</b>              | <b>52 (25.2)</b>  | <b>154 (74.8)</b> |                  |
| <b>Others</b>                        | <b>10 (14.7)</b>  | <b>58 (85.3)</b>  |                  |
| <b>Ethnicity</b>                     |                   |                   |                  |
| Brahmin / Chhetri                    | 49 (14.6)         | 286 (85.4)        | <b>&lt;0.001</b> |
| Janajati                             | 189 (23.2)        | 627 (76.8)        |                  |
| Dalit                                | 14 (17.9)         | 64 (82.1)         |                  |
| Terai Major Caste                    | 6 (7.2)           | 77 (92.8)         |                  |
| <b>Type of Family</b>                |                   |                   |                  |
| Nuclear                              | 161 (18.1)        | 727 (81.9)        | <b>0.043</b>     |
| Joint                                | 97 (22.9)         | 327 (77.1)        |                  |
| <b>Father's Occupation (n=1269)</b>  |                   |                   |                  |
| Foreign/Skilled/Semi Skilled         | 97 (25.1)         | 290 (74.9)        | <b>0.002</b>     |
| Rtd.Army/Unemployed                  | 16 (27.1)         | 43 (72.9)         |                  |
| Army/Service/Professional            | 49 (16.6)         | 247 (83.4)        |                  |
| Business                             | 67 (15.4)         | 367 (84.6)        |                  |
| Farmer                               | 23 (24.7)         | 70 (75.3)         |                  |
| <b>Mother's Occupation (n=1295)</b>  |                   |                   |                  |
| <b>Housewife/Farmer</b>              | <b>195 (18.7)</b> | <b>847 (81.3)</b> | <b>0.383</b>     |
| <b>Foreign/Skilled/Semi Skilled</b>  | <b>20 (24.4)</b>  | <b>62 (75.6)</b>  |                  |
| <b>Business/Service/Professional</b> | <b>36 (21.1)</b>  | <b>135 (78.9)</b> |                  |
| <b>Pocket Money/month (NRs.)</b>     |                   |                   |                  |
| <500                                 | 102 (16.6)        | 511 (83.4)        | <b>0.010</b>     |
| ≥500                                 | 156 (22.3)        | 543 (77.7)        |                  |

**Heard about FCTC**

|            |            |            |                  |
|------------|------------|------------|------------------|
| <b>Yes</b> | 54 (30.0)  | 126 (70.0) | <b>&lt;0.001</b> |
| <b>No</b>  | 204 (18.0) | 928 (82.0) |                  |

Students in late adolescence (16-19 years) were nearly two times likely to be tobacco users compared to middle adolescence (14-15 years) (OR= 1.92, CI=1.28, 2.90). Male students were 11.5 times more likely to use tobacco compared to females (OR= 11.59, CI= 7.44, 18.05). The students belonging to Janajati ethnicity were twice as likely to be users of tobacco as those who were Brahmin/Chhetris (OR=2.11, CI=1.43, 3.11). The adolescents who received pocket money of more than or equal to NRs.500 per month had nearly 1.5 times more chances of using tobacco compared to those who received less than NRs.500 per month (OR= 1.47, CI= 1.06, 2.05). (Table 4)

**Table 4: Association of different variables with tobacco habit of adolescent students: a multivariate analysis (N=1312)**

| <b>Characteristics</b>   | <b>Adjusted Odds Ratio (95% CI)</b> |
|--------------------------|-------------------------------------|
| <b>Age Group (years)</b> |                                     |
| 14-15                    | 1.00                                |
| 16-19                    | <b>1.92 (1.28,2.90)</b>             |

**Gender**

|        |                            |
|--------|----------------------------|
| Female | 1.00                       |
| Male   | <b>11.59 (7.44, 18.05)</b> |

**Grade**

|    |                          |
|----|--------------------------|
| 9  | 1.00                     |
| 10 | 1.44 (0.95, 2.17)        |
| 11 | <b>0.51 (0.27, 0.93)</b> |
| 12 | 0.67 (0.37, 1.23)        |

**Ethnicity**

|                   |                          |
|-------------------|--------------------------|
| Brahmin/Chhetri   | 1.00                     |
| Janajati          | <b>2.11 (1.43, 3.11)</b> |
| Dalit             | 1.71 (0.83, 3.54)        |
| Terai Major Caste | 0.48 (0.19, 1.22)        |

**Type of Family**

|         |                   |
|---------|-------------------|
| Joint   | 1.00              |
| Nuclear | 0.73 (0.52, 1.01) |

**Pocket Money per month**

|      |                          |
|------|--------------------------|
| <500 | 1.00                     |
| ≥500 | <b>1.47 (1.06, 2.05)</b> |

---

*-2 Log likelihood=1001.860, Chi-square=11.015, df=8, p=0.201*

## Discussion

The WHO has defined the adolescents as persons in the 10 to 19 years age group. It has also estimated that 70% of premature deaths among adults are due to behavioural patterns that emerge in adolescence including smoking, violence and sexual behaviour. Studies have shown that such risk taking behaviours begin to manifest from the middle adolescence (14-15 years of age) onwards.[8] The present study therefore, focussed on the specific group of middle and late adolescents.

The mean age of participants was 15.70 years which was higher than National GYTS in Nepal in 2007 which included subjects from 13-15 years age group only. Almost equal proportion of male (52.9%) and female (47.1%) students were involved in our study which is similar to the participation in the study conducted in Pokhara, Nepal.[9] Participants belonging to Rai, Limbu and Newar ethnicity were more in this study which might have accounted for the higher proportion of Janajatis unlike other studies.[9]

The prevalence of tobacco use in this study was 19.7% which was more compared to similar study from western Nepal.[7] This burden was more than eight times in the boys (33.6%) as compared to girls (4%). Similar difference of prevalence between the genders was seen in other studies conducted in Nepal and abroad.[8-11] This highlights the fact that although in most developing countries boys continue to smoke at a higher rate than girls, the rates in girls are in a rising trend.

The mean (SD) age for tobacco use initiation in our study was found to be 13.79 (2.21) years and 13.58 (2.11) years for smoking and chewing tobacco respectively. This is in consistency with



1  
2  
3 studies from Kathmandu, Noida, and Kerala, India where the mean ages of onset were 14.15 (SD  
4 2.62), 12.4 and 13.2 years respectively.[12-14] Early and middle adolescence is more vulnerable  
5  
6 for initiation of tobacco use hence, a target group is highlighted for early intervention to reduce  
7  
8 the uptake of this habit.  
9  
10

11  
12  
13 Our study has shown that more than half (51%) of the adolescent tobacco users prefer public  
14 places as their most common location of tobacco use and shops as the most common source  
15 (75.6%). Similar results have been obtained in the study from Pokhara, Nepal which showed that  
16 most of the respondents (66.7%) smoked in public places like tea stalls or restaurants and  
17 majority purchased it from the shops.[7] According to a study from Kerala, India, the most  
18 preferred places for smoking were friends' house and public places.[6] Provision of unrestricted  
19 access to tobacco products in the shops especially to the adolescents including minors, and its  
20 open use in public places pose a great challenge to the effective implementation of the  
21 regulations of the anti tobacco law in Nepal.  
22  
23  
24  
25  
26  
27  
28  
29  
30  
31  
32  
33

34  
35 We found that students in late adolescence were nearly two times more likely to consume  
36 tobacco compared to those in middle adolescence. Similar results were seen in other studies  
37 where students aged 16 years and above were nearly three times more likely to be tobacco users  
38 compared to those who were 13 years old (Adjusted OR=2.9, CI=1.6-5.3).[6] The burden of  
39 tobacco use is more likely in later adolescence thus cessation attempts need to be focused in  
40 these groups.  
41  
42  
43  
44  
45  
46  
47  
48  
49

50  
51 There was a huge gap in the likelihood of using tobacco among males and females after  
52 regression analysis in this study. Other studies have also reported similar discrepancies.[5,7,10]  
53  
54  
55  
56  
57  
58  
59  
60

1  
2  
3 Tobacco use can be considered as part of a constellation of risk-taking behaviors that is more  
4 prevalent in the males.[15]  
5  
6  
7

8  
9 Jajajatis were two times more likely to consume tobacco compared to Brahmins/Chhetris in our  
10 study. Tobacco chewing was significantly more among the hill native castes which included Rai,  
11 Limbu, Magar, Tamang, Gurung whereas smoking was significantly higher among the hill  
12 occupational castes which included Biswakarma, Pariyar and Sarki in a study conducted among  
13 females population of Dharan.[16] Nepal Adolescent and Youth Survey (NAYS) in 2010 showed  
14 similar results in which relatively advantaged Janajati had higher prevalence of liquor (32.60%)  
15 and tobacco use (16.62%) followed by disadvantaged Janajatis (27.83% and 13.71%  
16 respectively).[17] The population of hill region is more diverse than the Terai region in its  
17 ethnic, caste, and religious composition and the attitude towards smoking is more permissive  
18 among the people from the hills.[18] This might be a possible explanation for the higher  
19 prevalence of tobacco use seen among the Janajatis in various studies across Nepal including  
20 ours.  
21  
22  
23  
24  
25  
26  
27  
28  
29  
30  
31  
32  
33  
34  
35  
36  
37

38 Adolescents who received more than or equal to NRs. 500 as pocket money were nearly 1.5  
39 times more likely to be tobacco users as compared to those who received less. Greater likelihood  
40 of using tobacco with higher amount of pocket money was reflected in other studies as well.[5,6]  
41 Having some amount of disposable money at hand might predispose the adolescents towards use  
42 of tobacco by easing the access.  
43  
44  
45  
46  
47  
48  
49

50  
51 Our study had few limitations. Even though the participation in the study was entirely voluntary  
52 with an assurance of non disclosure of identity and confidentiality, chances of bias may occur in  
53 the findings as the data was collected through self administered questionnaire. The assessment of  
54  
55  
56  
57

1  
2  
3 the tobacco use status was based entirely upon the response given by the subject and not  
4 validated by biomarkers. However, the use of standard questionnaire and a large sample size  
5 enabled our study for comparison with other national and international studies and generalization  
6 to adolescent students of this municipality. It also reflects the burden of tobacco in a rapidly  
7 urbanizing town of Eastern Nepal post legalization of anti-tobacco law and stresses urgent need  
8 to address the target group.  
9  
10  
11  
12  
13  
14  
15  
16

### 17 18 **Conclusion** 19

20  
21 The study revealed significant burden of tobacco use among the adolescents despite the existence  
22 of anti-tobacco regulations in the country. Late adolescence, male gender, Janajati ethnicity and  
23 higher pocket money were significantly associated with tobacco use. Taking these factors into  
24 consideration, tobacco focussed interventions should target vulnerable groups to prevent uptake  
25 of the habit and support abstinence among the users. An effective implementation of Tobacco  
26 Control and Regulatory Act 2010 is also required to address this problem.  
27  
28  
29  
30  
31  
32  
33  
34  
35

### 36 37 **Competing Interests** 38

39 The author(s) declare that they have no competing interests.  
40  
41  
42

### 43 44 **Acknowledgement** 45

46 Our sincere appreciation goes to all the students who agreed to participate in this study and the  
47 respected principals of the schools who allowed us to conduct this study by lending their  
48 valuable time  
49  
50  
51  
52

### 53 54 **Contributorship statement** 55

1  
2  
3 Dr. Pranil Man Singh Pradhan was involved in designing the protocol, collection, entering and  
4 analysis of data and preparation of the final document. Prof. Paras Kumar Pokharel was  
5 responsible for the overall review of the protocol and final report and provided critical analysis  
6 where needed. Dr. Surya Raj Niraula assisted in data entry and analysis and concentrated on  
7 presentation of the results. Dr. Anup Ghimire and Dr. Suman Bahadur Singh were involved in  
8 the critical review of the final report and provided necessary feedback.  
9  
10  
11  
12  
13  
14  
15  
16  
17

### 18 **What this paper adds**

19  
20  
21 This study highlights upon the burden of tobacco use that still exists among the adolescent  
22 students despite the endorsement of anti tobacco law in Nepal in 2011.  
23  
24  
25  
26

27 Ethnicity was significantly associated with tobacco use as adolescent students belonging to  
28 Janajati ethnicity had greater likelihood of using tobacco products compared to  
29 Brahmins/Chhetris.  
30  
31  
32  
33  
34

### 35 **Data sharing statement**

36  
37  
38 Extra data is available by emailing Dr. Pranil Man Singh Pradhan (pranil.pradhan@gmail.com)  
39  
40  
41  
42  
43  
44  
45  
46  
47

### 48 **References**

49  
50  
51 1. Detels R, Beaglehole R, Lansang MA et al. Oxford Textbook of Public Health. Oxford  
52 University Press 2009  
53  
54  
55  
56  
57  
58  
59  
60

- 1  
2  
3 2. Warren CW, Jones NR, Eriksen MP et al for the Global Tobacco Surveillance System (GTSS)  
4  
5 collaborative group. Patterns of global tobacco use in young people and implications for future  
6  
7 chronic disease burden in adults. *Lancet* 2006;367:749-753  
8  
9
- 10  
11 3. WHO. Office for South-East Asia (SEARO). Profile on Implementation of WHO Framework  
12  
13 Convention on Tobacco Control in the South-East Asia Region. New Delhi, India.2011  
14  
15
- 16  
17 4. Pandey MR, Pathak RP, Shrestha S et al. National Global Youth Tobacco Survey (GYTS) and  
18  
19 National Global School Personnel Survey (GSPS) in Nepal 2007  
20  
21
- 22  
23 5. Rachiotis G, Muula AS, Rudatsikira E et al. Factors associated with adolescent cigarette  
24  
25 smoking in Greece: Results from a cross sectional study (GYTS Study). *BMC Public Health*  
26  
27 2008;8:313  
28  
29
- 30  
31 6. Mohan S, Sarma PS, Thankappan KR. Access to Pocket money and low educational  
32  
33 performance predict tobacco use among adolescent boys in Kerala, India. *Preventive Medicine*  
34  
35 2005;41:685-692  
36  
37
- 38  
39 7. Sreeramareddy CT, Kishore PV, Paudel J et al. Prevalence, distribution and correlates of  
40  
41 tobacco smoking and chewing in Nepal: a secondary data analysis of Nepal Demographic and  
42  
43 Health Survey-2006. *Subst Abuse Treat Prev Policy* 2011;6(33)  
44  
45
- 46  
47 8. Sharma R,Grover VL,Chaturvedi S. Tobacco Use Among Adolescent Students and the  
48  
49 Influence of Role Models. *Indian J Community Med* 2010;35(2)  
50  
51
- 52  
53 9. Paudel D, Pathak RP. Tobacco Use among Adolescent Students in Secondary Schools of  
54  
55 Pokhara Sub Metropolitan City. *J Nepal Health Res Counc* 2003;1(2)  
56  
57

- 1  
2  
3 10. Kapoor SK, Anand K, Kumar G. Prevalence of Tobacco Use Among School and College  
4  
5  
6  
7  
8  
9  
10  
11  
12  
13  
14  
15  
16  
17  
18  
19  
20  
21  
22  
23  
24  
25  
26  
27  
28  
29  
30  
31  
32  
33  
34  
35  
36  
37  
38  
39  
40  
41  
42  
43  
44  
45  
46  
47  
48  
49  
50  
51  
52  
53  
54  
55  
56  
57  
58  
59  
60
10. Kapoor SK, Anand K, Kumar G. Prevalence of Tobacco Use Among School and College  
Going Adolescents of Haryana. *Indian J Pediatr* 1995;62:461-466
11. Soteriades ES, Spanoudis G, Talias MA et al. Children's loss of autonomy over smoking: the  
global youth tobacco survey. *Tob Control* 2011;20:201-206
12. Aryal UR, Deuba K, Subedi A et al. Prevalence and Determinants of Cigarette Students of  
Kathmandu Valley. *Asian Journal of Medical Sciences* 2010;1:53-58
13. Narain R, Sardana S, Gupta S et al. Age at initiation & prevalence of tobacco use among  
school children in Noida, India: A cross-sectional questionnaire based survey. *Indian J Med Res*  
2011;133(3):300-307
14. Pradeepkumar AS, Mohan S, Gopalakrishnan P et al. Tobacco use in Kerala: findings from  
three recent studies. *Natl Med J India* 2005;18:148-153
15. WHO. What about boys: A literature review on the health and development of adolescent  
boys. Geneva: WHO:2002
16. Niraula SR. Tobacco Use among Women in Dharan, Eastern Nepal. *J Health Popul Nutr*  
2004;22(1):68-74
17. Population Division Government of Nepal Ministry of Health and Population. Nepal  
Adolescent and Youth Survey 2010/11 Highlights
18. Chloe MK, Kiting AS, Lin HS et al. The Youth Tobacco Epidemic in Asia. *East-West Center  
Working Papers Population Series* 2001;108-117

1  
2  
3 **19.** Central Bureau of Statistics. Population Monograph of Nepal Volume 1 2003. National  
4  
5  
6 Planning Commission. Government of Nepal  
7  
8  
9  
10  
11  
12  
13  
14  
15  
16  
17  
18  
19  
20  
21  
22  
23  
24  
25  
26  
27  
28  
29  
30  
31  
32  
33  
34  
35  
36  
37  
38  
39  
40  
41  
42  
43  
44  
45  
46  
47  
48  
49  
50  
51  
52  
53  
54  
55  
56  
57  
58  
59  
60

For peer review only

**Title:** Tobacco Use and Associated Factors among Adolescent Students in Dharan: A Cross Sectional Study

**Corresponding Author:**

Dr. Prnil Man Singh Pradhan

Junior Resident

School of Public Health and Community Medicine

B.P. Koirala Institute of Health Sciences (BPKIHS)

Dharan, Nepal

Phone: 9771025-525555-2626

P.O. Box 7053

Email: prnil.pradhan@gmail.com

**Co authors:**

|    | <b>Co authors' Name</b>  | <b>Designation</b>   | <b>Department</b>                                                     |
|----|--------------------------|----------------------|-----------------------------------------------------------------------|
| 1. | Dr. Paras Kumar Pokharel | Professor and Chief  | School of Public Health and Community Medicine, BPKIHS, Dharan, Nepal |
| 2. | Dr. Surya Raj Niraula    | Additional Professor | School of Public Health and Community Medicine, BPKIHS, Dharan, Nepal |
| 3. | Dr. Anup Ghimire         | Associate Professor  | School of Public Health and Community Medicine, BPKIHS, Dharan, Nepal |
| 4. | Dr. Suman Bahadur Singh  | Associate Professor  | School of Public Health and Community Medicine, BPKIHS, Dharan, Nepal |

**Keywords:** tobacco use, adolescent students, Nepal

**Word Count:** 2862



## Article Summary

### 1. Article focus

- What is the burden of tobacco use among the adolescent students of Dharan post legalization of anti tobacco directives in Nepal?
- What factors are likely to aggravate this burden among the students?

### 2. Key messages

- Significant burden of tobacco use exists among the adolescent students of Dharan despite the existence of anti-tobacco regulations in the country.
- Tobacco focussed interventions should target vulnerable groups to prevent uptake of the habit and support abstinence among the users taking the factors found significant in this study

### 3. Strengths

- Use of a standard questionnaire **and a large sample** enabled our study for comparison with other national and international studies

### 4. Limitations

- Since tobacco use was assessed by self administered questionnaire, chances of bias in responses exist.
- Tobacco use status was not validated by biomarkers in our study.

1  
2  
3 **Tobacco Use and Associated Factors among Adolescent Students in Dharan: A Cross**  
4  
5 **Sectional Study**  
6  
7

8  
9 Pradhan PMS<sup>1</sup>, Pokharel PK<sup>2</sup>, Niraula SR<sup>3</sup>, Ghimire A<sup>4</sup>, Singh SB<sup>5</sup>  
10

11  
12 (<sup>1</sup>Junior Resident, <sup>2</sup> Professor, <sup>3</sup> Additional Professor, <sup>4</sup> Associate Professor, <sup>5</sup> Associate  
13  
14 Professor, School of Public Health and Community Medicine, BPKIHS)  
15  
16

17  
18 **Abstract**  
19

20  
21 **Introduction:** The tobacco use among the youth, in both smoking and smokeless forms, is quite  
22  
23 high in the South East Asia region. Tobacco use is a major proven risk factor and contributes  
24  
25 substantially to the rising epidemic of non communicable diseases.  
26  
27

28  
29 **Objectives:** To explore the burden of tobacco use and its associated factors among adolescent  
30  
31 students of Dharan municipality  
32  
33

34  
35 **Design:** Cross sectional  
36  
37

38  
39 **Setting:** Secondary and higher secondary schools of Dharan municipality in Sunsari district of  
40  
41 Nepal  
42

43  
44 **Participants:** Students in middle and late adolescence (aged 14-19 years) from grades 9, 10, 11  
45  
46 and 12 were included. Out of the total sample of 1454, 1312 students completed the  
47  
48 questionnaires giving the response rate of 90.23%.  
49  
50

51  
52 **Primary outcome measure:** Tobacco use which was defined as one who has ever used any  
53  
54 tobacco product.  
55  
56

1  
2  
3 **Methodology:** Self administered questionnaire adapted from Global Youth Tobacco Survey was  
4 used to assess tobacco use among the representative sample of 1312 adolescent students in  
5 Dharan from July 2011 to July 2012 using stratified random sampling  
6  
7  
8  
9

10  
11 **Results:** Prevalence of ever use of any tobacco product was 19.7%. More than half of the  
12 tobacco users (51.9%) preferred to consume tobacco in public places whereas almost a third  
13 (75.6%) of the consumers purchased tobacco directly from the shops. Multivariate analysis  
14 showed that tobacco use was associated with late adolescence (OR: 1.92; 95%CI: 1.28-2.90),  
15 male gender (OR: 11.59; 95%CI: 7.44-18.05), Janajati ethnicity (OR: 2.11; 95%CI: 1.43-3.11)  
16 and having pocket money of more than or equal to NRs.500 per month (OR: 1.47; 95%CI: 1.06-  
17 2.05).  
18  
19  
20  
21  
22  
23  
24  
25  
26  
27

28 **Conclusion:** Tobacco focussed interventions are required for school/college going students in  
29 order to promote cessation among users and prevent initiation, focusing on the significant factors  
30 found by this study. Further researches are needed to explore the vulnerability of certain ethnic  
31 groups towards tobacco use to generate an effective awareness campaign.  
32  
33  
34  
35  
36  
37  
38  
39  
40  
41  
42  
43  
44  
45  
46  
47  
48  
49  
50  
51  
52  
53  
54  
55  
56  
57  
58  
59  
60

## Introduction

Nearly 70% of the world's smokers live in low and middle income countries. **Nearly two-thirds of the world's smokers live in 10 countries, namely China, India, Indonesia, Russian Federation, the United States, Japan, Brazil, Bangladesh, Germany and Turkey.** [1] Unless a large number of current smokers in developing countries quit, it is estimated that smoking will be causing 10 million deaths per year worldwide by the 2020s or early 2030s, of which 7 million will be in developing countries. [2]

The tobacco use among the youth, in both smoking and smokeless forms, is quite high in the South East Asia region **including Nepal** the major reason being the creative and targeted marketing strategies of various tobacco companies and its weak regulation. Abundant tobacco production, weak enforcement of tobacco control measures and easy accessibility and affordability of these products are other factors leading to the rise of the epidemic in the youth.[3] Although the exact burden of tobacco use among the youth has not been studied extensively in Nepal, a national Global Youth Tobacco Survey (GYTS) in 2007 reported that overall 7-9% of the students ever smoked cigarettes, even 1 or 2 puffs.[4] Some of the factors known to be associated with tobacco use among adolescents are age, gender, having smoker friends or parents and the amount of pocket money.[5-7]

The Government of Nepal had signed the Framework Convention on Tobacco Control (FCTC) on December 3, 2003 followed by its ratification by the House of Representatives on November 7, 2006. In what was regarded as a landmark in the nation's campaign against tobacco, the government finally assented to the anti-tobacco directives of Tobacco Product Control and Regulatory Act 2010 on November 4, 2011. This has reflected a strong will from the side of the

1  
2  
3 government to comply by objectives set out in the convention. However, the implementation of  
4 the anti-tobacco directives has not been experienced to the fullest. A need was felt to explore this  
5 burden and the associated factors within the Nepalese youth who are the most vulnerable for  
6 adoption of this habit and continuation, in a town of Sunsari district in the background of recent  
7 endorsement of anti-tobacco directives by the government.  
8  
9

## 16 **Methods**

17  
18  
19 This was a comparative cross sectional study conducted in Dharan Municipality of Sunsari  
20 district of Nepal from July 2011 to July 2012. It was shown in a study from South Delhi that the  
21 overall prevalence of tobacco use (smoking and smokeless forms) was 20.9%. [8] We calculated  
22 the minimum sample size to estimate the prevalence for 95% confidence limits at an allowable  
23 error of 10% to be 1454 individuals.  
24  
25  
26  
27  
28  
29

30  
31  
32 Students in middle and late adolescence (aged 14-19 years) from grades 9, 10, 11 and 12 in  
33 different schools of Dharan Municipality were included in this study. Current list of schools in  
34 Dharan was obtained from Private and Boarding School's Organization, Nepal (PABSON). From  
35 the list of 87 schools (private and government), stratified random sampling with proportionate  
36 allocation technique based on population size was carried out. This was followed by random  
37 selection of classes from the selected schools. All the students from the selected classes were  
38 included in the study.  
39  
40  
41  
42  
43  
44  
45  
46  
47  
48

49 Data collection was carried out using a self administered questionnaire adapted from Global  
50 Youth Tobacco Survey (2001) containing questions regarding socio-demographic profile,  
51 parental occupation, having heard about FCTC and pocket money received per month. The  
52  
53  
54  
55  
56  
57  
58  
59  
60

1  
2  
3 questionnaire to be used was pretested among the adolescent students in a different area (Itahari)  
4  
5 and necessary corrections and modifications were made in order to make it more understandable  
6  
7  
8 for the students. An elaborative briefing on the questionnaire was done to all the students of the  
9  
10 class prior to data collection. The outcome variable was tobacco use which was defined as one  
11  
12 who has ever used any tobacco product. Current tobacco use was defined as one who has used  
13  
14 tobacco product (smoking or chewing) in the past one month. Non user was the one who had  
15  
16 never consumed any tobacco product.  
17  
18

19  
20  
21 On the basis of age, participants were classified into middle (14-15 years) and late (16-19 years)  
22  
23 adolescence. The pocket money was dichotomized based on the median amount received per  
24  
25 month.  
26  
27

28  
29 Ethical clearance was acquired from the ethical committee of B.P. Koirala Institute of Health  
30  
31 Sciences at the start of the study. Informed consent was taken from all the participants. We  
32  
33 obtained written permission from the school authorities before interaction with the students. All  
34  
35 the students present at the time of the visit were included in the study. Participation in the study  
36  
37 was entirely voluntary and full confidentiality of the responses was maintained after clear  
38  
39 explanation of the objectives of the study. Absence of any school personnel or teacher at the time  
40  
41 of data collection was ensured in order to prevent response bias.  
42  
43  
44

45  
46 Collected data were entered into MS Windows Excel in the form of codes. Analysis was  
47  
48 performed using Statistical Package for Social Sciences (SPSS) 17 version. **In bivariate  
49  
50 analysis with categorical variables, Chi-Square test was applied. The following potential  
51  
52 confounders were chosen based on the previous literature: age group, gender, type of  
53  
54 school, grade, religion, ethnicity, type of family, parental occupation, pocket money and  
55  
56**

1  
2  
3 **having heard of FCTC. Tobacco use was considered as the dependent variable. The**  
4 **independent variables which had p value of 20% or less in the bivariate analysis were then**  
5 **included for binary logistic regression analysis with backward elimination to estimate the**  
6 **adjusted odds ratio and 95% confidence intervals. The variables subjected to the model**  
7 **were age group, gender, grade, religion, ethnicity, type of family, occupation of the father,**  
8 **pocket money received per month and having heard about FCTC by the study**  
9 **participants.** Goodness of fit of the model was tested by Hosmer and Lemeshow test.  
10  
11  
12  
13  
14  
15  
16  
17  
18  
19  
20 Probability of significance was set at 5%.

## 21 22 23 **Results**

24  
25  
26 Out of the total sample, 1312 students completed the questionnaire giving the response rate of  
27  
28 90.23%. Among the remaining questionnaires, eighty were incomplete whereas sixty two did not  
29  
30 match the age criteria therefore were excluded from the data analyses.

31  
32  
33  
34 Among the participants, the mean age was 15.70 years (SD = 1.33). Proportion of students in the  
35  
36 age group of middle adolescence (14-15 years) and late adolescence (16-19 years) were almost  
37  
38 equal. The participation was almost equal from both the gender (Male: Female=1.1:1).  
39  
40 Participants who were Janajati by ethnicity were predominant. Other religions comprised of  
41  
42 Christianity, Muslim, Jainism, Sahajyog and Heavenly path or Premwaad (Lovism). (Table 1)  
43  
44  
45

46  
47 **Table 1: Socio-demographic characteristics of the adolescent students in Dharan, Sunsari**  
48  
49 **(N=1312)**

| 52 <b>Characteristics</b>   | 53 <b>Number</b> | 54 <b>Percentage</b> |
|-----------------------------|------------------|----------------------|
| 55 <b>Age Group (years)</b> | 56               | 57                   |
|                             | 58 8             | 59                   |
|                             | 60               |                      |

|                        |             |             |
|------------------------|-------------|-------------|
| 14-15                  | 648         | 49.4        |
| 16-19                  | 664         | 50.6        |
| <b>Gender</b>          |             |             |
| Male                   | 694         | 52.9        |
| Female                 | 618         | 47.1        |
| <b>School</b>          |             |             |
| <b>Private</b>         | <b>1176</b> | <b>89.6</b> |
| <b>Government</b>      | <b>136</b>  | <b>10.4</b> |
| <b>Education Level</b> |             |             |
| 9                      | 551         | 42          |
| 10                     | 422         | 32.2        |
| 11                     | 174         | 13.3        |
| 12                     | 165         | 12.6        |
| <b>Ethnicity*</b>      |             |             |
| Janajati               | 816         | 62.2        |
| Brahmin/Chhetri        | 335         | 25.5        |
| Terai Major Caste      | 83          | 6.3         |
| Dalit                  | 78          | 5.9         |
| <b>Religion</b>        |             |             |
| Hindu                  | 1038        | 79.1        |
| <b>Buddhist/Kirat</b>  | <b>206</b>  | <b>15.7</b> |
| Others                 | 68          | 5.2         |



**\*Janajati: Rai, Limbu, Magar, Newar; Brahmin/Chhetri: Baral, Neupane, Oli, Paudel Terai Major Caste: Agrawal, Das, Jha, Roy, Sah, Yadav; Dalit: Bafna, Kuki, Mardi, Tamli etc. [19]**

Of the respondents' fathers who were alive, majority (34.2%) were involved in business. Almost four-fifths (80.5%) of the respondent's mothers who were alive were housewives and farmers.

The prevalence of tobacco use (one who has ever used any tobacco product) was estimated to be 19.7%. The prevalence among males and females was 33.6% and 4.0% respectively. The prevalence of current smoking was 13.9% whereas that of current use of chewable tobacco was 6% in our study. (Table 2)

**Table 2: Tobacco consumption among the adolescent students in Dharan, Sunsari**

| <b>Tobacco consumption status</b>           | <b>Male (n=694)<br/>% (C.I.*)</b> | <b>Female (n=618)<br/>% (C.I.*)</b> | <b>Total (N=1312)<br/>% (C.I.*)</b> |
|---------------------------------------------|-----------------------------------|-------------------------------------|-------------------------------------|
| <b>Tobacco user</b>                         | 33.6 (30.2,36.9)                  | 4.0 (2.6,5.3)                       | 19.7 (17.7, 21.6)                   |
| <b>Current smoker</b>                       | 24.8 (21.5,28.0)                  | 1.6 (0.6,2.5)                       | 13.9 (12.1,15.6)                    |
| <b>Currently using<br/>chewable tobacco</b> | 10.4 (8.2,12.5)                   | 1.1 (0.3,1.8)                       | 6.0 (4.7,7.2)                       |

\* C.I. = 95% Confidence intervals

The mean age of initiating tobacco smoking was 13.79 years (SD = 2.21) whereas that of initiating tobacco chewing was 13.58 years (SD = 2.11). More than half of the users (51.9%) preferred to consume tobacco in public places followed by friend's house (14%). Almost a third (75.6%) of the users purchased tobacco directly from the shops. This study found the median expenditure on tobacco to be Nepalese Rupees (NRs). 100 per month (Inter-quartile range 30-

200) (NRs. 3.33 or 0.037 United States Dollar per day), which was one fifth of their pocket money (Median 500, Inter-quartile range 300-1000).

In the bivariate analysis, proportion of tobacco use increased significantly with age and higher amount of pocket money received monthly. Tobacco use was significantly associated with gender, grade, caste, type of family, father's occupation and **having heard about** Framework Convention on Tobacco Control (FCTC).(Table 3)

**Table 3: Different characteristics of participants and tobacco use: a bivariate analysis**

| Characteristics          | Tobacco User N(%) | Tobacco Non User N(%) | p value          |
|--------------------------|-------------------|-----------------------|------------------|
| <b>Age Group (years)</b> |                   |                       |                  |
| 14-15                    | 87 (13.4)         | 561 (86.6)            | <b>&lt;0.001</b> |
| 16-19                    | 171 (25.8)        | 493 (74.2)            |                  |
| <b>Gender</b>            |                   |                       |                  |
| Male                     | 233 (33.6)        | 461 (66.4)            | <b>&lt;0.001</b> |
| Female                   | 25 (4.0)          | 593 (96.0)            |                  |
| <b>Type of School</b>    |                   |                       |                  |
| <b>Private</b>           | <b>230 (19.6)</b> | <b>946 (80.4)</b>     | <b>0.775</b>     |
| <b>Government</b>        | <b>28 (20.6)</b>  | <b>108 (79.4)</b>     |                  |
| <b>Grade</b>             |                   |                       |                  |
| 9                        | 82 (14.9)         | 469 (85.1)            | <b>&lt;0.001</b> |
| 10                       | 116 (27.5)        | 306 (72.5)            |                  |
| 11                       | 29 (16.7)         | 145 (83.3)            |                  |

|                                      |                   |                   |              |
|--------------------------------------|-------------------|-------------------|--------------|
| 12                                   | 31 (18.8)         | 134 (81.2)        |              |
| <b>Religion</b>                      |                   |                   |              |
| <b>Hindu</b>                         | <b>196 (18.9)</b> | <b>842 (81.1)</b> | <b>0.063</b> |
| <b>Buddhist / Kirat</b>              | <b>52 (25.2)</b>  | <b>154 (74.8)</b> |              |
| <b>Others</b>                        | <b>10 (14.7)</b>  | <b>58 (85.3)</b>  |              |
| <b>Ethnicity</b>                     |                   |                   |              |
| Brahmin / Chhetri                    | 49 (14.6)         | 286 (85.4)        | <0.001       |
| Janajati                             | 189 (23.2)        | 627 (76.8)        |              |
| Dalit                                | 14 (17.9)         | 64 (82.1)         |              |
| Terai Major Caste                    | 6 (7.2)           | 77 (92.8)         |              |
| <b>Type of Family</b>                |                   |                   |              |
| Nuclear                              | 161 (18.1)        | 727 (81.9)        | <b>0.043</b> |
| Joint                                | 97 (22.9)         | 327 (77.1)        |              |
| <b>Father's Occupation (n=1269)</b>  |                   |                   |              |
| Foreign/Skilled/Semi Skilled         | 97 (25.1)         | 290 (74.9)        | <b>0.002</b> |
| Rtd.Army/Unemployed                  | 16 (27.1)         | 43 (72.9)         |              |
| Army/Service/Professional            | 49 (16.6)         | 247 (83.4)        |              |
| Business                             | 67 (15.4)         | 367 (84.6)        |              |
| Farmer                               | 23 (24.7)         | 70 (75.3)         |              |
| <b>Mother's Occupation (n=1295)</b>  |                   |                   |              |
| <b>Housewife/Farmer</b>              | <b>195 (18.7)</b> | <b>847 (81.3)</b> | <b>0.383</b> |
| <b>Foreign/Skilled/Semi Skilled</b>  | <b>20 (24.4)</b>  | <b>62 (75.6)</b>  |              |
| <b>Business/Service/Professional</b> | <b>36 (21.1)</b>  | <b>135 (78.9)</b> |              |

**Pocket Money/month (NRs.)**

|      |            |            |              |
|------|------------|------------|--------------|
| <500 | 102 (16.6) | 511 (83.4) | <b>0.010</b> |
| ≥500 | 156 (22.3) | 543 (77.7) |              |

**Heard about FCTC**

|            |            |            |                  |
|------------|------------|------------|------------------|
| <b>Yes</b> | 54 (30.0)  | 126 (70.0) | <b>&lt;0.001</b> |
| <b>No</b>  | 204 (18.0) | 928 (82.0) |                  |

Students in late adolescence (16-19 years) were nearly **two times likely** to be tobacco users compared to middle adolescence (14-15 years) (OR= 1.92, CI=1.28, 2.90). Male students were 11.5 times more likely to use tobacco compared to females (OR= 11.59, CI= 7.44, 18.05). The students belonging to Janajati ethnicity **were twice as likely to be users of tobacco as** those who were Brahmin/Chhetris (OR=2.11, CI=1.43, 3.11). The adolescents who received pocket money of more than or equal to NRs.500 per month had nearly 1.5 times more chances of using tobacco compared to those who received less than NRs.500 per month (OR= 1.47, CI= 1.06, 2.05). (Table 4)

**Table 4: Association of different variables with tobacco habit of adolescent students: a multivariate analysis (N=1312)**

| <b>Characteristics</b> | <b>Adjusted Odds Ratio (95%<br/>CI)</b> |
|------------------------|-----------------------------------------|
|------------------------|-----------------------------------------|

---

**Age Group (years)**

|       |                         |
|-------|-------------------------|
| 14-15 | 1.00                    |
| 16-19 | <b>1.92 (1.28,2.90)</b> |

**Gender**

|        |                            |
|--------|----------------------------|
| Female | 1.00                       |
| Male   | <b>11.59 (7.44, 18.05)</b> |

**Grade**

|    |                          |
|----|--------------------------|
| 9  | 1.00                     |
| 10 | 1.44 (0.95, 2.17)        |
| 11 | <b>0.51 (0.27, 0.93)</b> |
| 12 | 0.67 (0.37, 1.23)        |

**Ethnicity**

|                   |                          |
|-------------------|--------------------------|
| Brahmin/Chhetri   | 1.00                     |
| Janajati          | <b>2.11 (1.43, 3.11)</b> |
| Dalit             | 1.71 (0.83, 3.54)        |
| Terai Major Caste | 0.48 (0.19, 1.22)        |

**Type of Family**

|         |                   |
|---------|-------------------|
| Joint   | 1.00              |
| Nuclear | 0.73 (0.52, 1.01) |

**Pocket Money per month**

|      |                          |
|------|--------------------------|
| <500 | 1.00                     |
| ≥500 | <b>1.47 (1.06, 2.05)</b> |

---

*-2 Log likelihood=1001.860, Chi-square=11.015, df=8, p=0.201*

## Discussion

The WHO has defined the adolescents as persons in the 10 to 19 years age group. It has also estimated that 70% of premature deaths among adults are due to behavioural patterns that emerge in adolescence including smoking, violence and sexual behaviour. Studies have shown that such risk taking behaviours begin to manifest from the middle adolescence (14-15 years of age) onwards.[8] The present study therefore, focussed on the specific group of middle and late adolescents.

The mean age of participants was 15.70 years which was higher than National GYTS in Nepal in 2007 which included subjects from 13-15 years age group only. Almost equal proportion of male (52.9%) and female (47.1%) students were involved in our study which is similar to the participation in the study conducted in Pokhara, Nepal.[9] Participants belonging to Rai, Limbu and Newar ethnicity were more in this study which might have accounted for the higher proportion of Janajatis unlike other studies.[9]

The prevalence of tobacco use in this study was 19.7% which was more compared to similar study from western Nepal.[7] This burden was more than eight times in the boys (33.6%) as compared to girls (4%). Similar difference of prevalence between the genders was seen in other studies conducted in Nepal and abroad.[8-11] This highlights the fact that although in most developing countries boys continue to smoke at a higher rate than girls, the rates in girls are in a rising trend.

1  
2  
3 The mean (SD) age for tobacco use initiation in our study was found to be 13.79 (2.21) years and  
4  
5 13.58 (2.11) years for smoking and chewing tobacco respectively. This is in consistency with  
6  
7 studies from Kathmandu, Noida, and Kerala, India where the mean ages of onset were 14.15 (SD  
8  
9 2.62), 12.4 and 13.2 years respectively.[12-14] Early and middle adolescence is more vulnerable  
10  
11 for initiation of tobacco use hence, a target group is highlighted for early intervention to reduce  
12  
13 the uptake of this habit.  
14  
15

16  
17  
18 Our study has shown that more than half (51%) of the adolescent tobacco users prefer public  
19  
20 places as their most common location of tobacco use and shops as the most common source  
21  
22 (75.6%). Similar results have been obtained in the study from Pokhara, Nepal which showed that  
23  
24 most of the respondents (66.7%) smoked in public places like tea stalls or restaurants and  
25  
26 majority purchased it from the shops.[7] According to a study from Kerala, India, the most  
27  
28 preferred places for smoking were friends' house and public places.[6] Provision of unrestricted  
29  
30 access to tobacco products in the shops especially to the adolescents including minors, and its  
31  
32 open use in public places pose a great challenge to the effective implementation of the  
33  
34 regulations of the anti tobacco law in Nepal.  
35  
36  
37  
38

39  
40 We found that students in late adolescence were nearly two times more likely to consume  
41  
42 tobacco compared to those in middle adolescence. Similar results were seen in other studies  
43  
44 where students aged 16 years and above were nearly three times more likely to be tobacco users  
45  
46 compared to those who were 13 years old (Adjusted OR=2.9, CI=1.6-5.3).[6] The burden of  
47  
48 tobacco use is more likely in later adolescence thus cessation attempts need to be focused in  
49  
50 these groups.  
51  
52  
53  
54  
55  
56  
57  
58  
59  
60

1  
2  
3 There was a huge gap in the likelihood of using tobacco among males and females after  
4 regression analysis in this study. Other studies have also reported similar discrepancies.[5,7,10]  
5  
6 Tobacco use can be considered as part of a constellation of risk-taking behaviors that is more  
7  
8 prevalent in the males.[15]  
9  
10

11  
12  
13 Jajajatis were two times more likely to consume tobacco compared to Brahmins/Chhetris in our  
14 study. Tobacco chewing was significantly more among the hill native castes which included Rai,  
15  
16 Limbu, Magar, Tamang, Gurung whereas smoking was significantly higher among the hill  
17  
18 occupational castes which included Biswakarma, Pariyar and Sarki in a study conducted among  
19  
20 females population of Dharan.[16] Nepal Adolescent and Youth Survey (NAYS) in 2010 showed  
21  
22 similar results in which relatively advantaged Janajati had higher prevalence of liquor (32.60%)  
23  
24 and tobacco use (16.62%) followed by disadvantaged Janajatis (27.83% and 13.71%  
25  
26 respectively).[17] The population of hill region is more diverse than the Terai region in its  
27  
28 ethnic, caste, and religious composition and the attitude towards smoking is more permissive  
29  
30 among the people from the hills.[18] This might be a possible explanation for the higher  
31  
32 prevalence of tobacco use seen among the Janajatis in various studies across Nepal including  
33  
34 ours.  
35  
36  
37  
38  
39  
40  
41

42  
43 Adolescents who received more than or equal to NRs. 500 as pocket money were nearly 1.5  
44  
45 times more likely to be tobacco users as compared to those who received less. Greater likelihood  
46  
47 of using tobacco with higher amount of pocket money was reflected in other studies as well.[5,6]  
48  
49 Having some amount of disposable money at hand might predispose the adolescents towards use  
50  
51 of tobacco by easing the access.  
52  
53  
54  
55  
56  
57  
58  
59  
60



1  
2  
3 Our study had few limitations. Even though the participation in the study was entirely voluntary  
4 with an assurance of non disclosure of identity and confidentiality, chances of bias may occur in  
5 the findings as the data was collected through self administered questionnaire. The assessment of  
6 the tobacco use status was based entirely upon the response given by the subject and not  
7 validated by biomarkers. However, the use of standard questionnaire and a large sample size  
8 enabled our study for comparison with other national and international studies and generalization  
9 to adolescent students of this municipality. It also reflects the burden of tobacco in a rapidly  
10 urbanizing town of Eastern Nepal post legalization of anti-tobacco law and stresses urgent need  
11 to address the target group.  
12  
13  
14  
15  
16  
17  
18  
19  
20  
21  
22  
23

## 24 25 **Conclusion**

26  
27  
28 The study revealed significant burden of tobacco use among the adolescents despite the existence  
29 of anti-tobacco regulations in the country. Late adolescence, male gender, Janajati ethnicity and  
30 higher pocket money were significantly associated with tobacco use. Taking these factors into  
31 consideration, tobacco focussed interventions should target vulnerable groups to prevent uptake  
32 of the habit and support abstinence among the users. An effective implementation of Tobacco  
33 Control and Regulatory Act 2010 **is also required to address this problem.**  
34  
35  
36  
37  
38  
39  
40  
41  
42

## 43 44 **Competing Interests**

45  
46  
47 The author(s) declare that they have no competing interests.  
48  
49

## 50 51 **Acknowledgement**

52  
53  
54  
55  
56  
57  
58  
59  
60

1  
2  
3 Our sincere appreciation goes to all the students who agreed to participate in this study and the  
4  
5 respected principals of the schools who allowed us to conduct this study by lending their  
6  
7 valuable time  
8  
9

### 10 11 **Contributorship statement** 12

13  
14 Dr. Pranil Man Singh Pradhan was involved in designing the protocol, collection, entering and  
15  
16 analysis of data and preparation of the final document. Prof. Paras Kumar Pokharel was  
17  
18 responsible for the overall review of the protocol and final report and provided critical analysis  
19  
20 where needed. Dr. Surya Raj Niraula assisted in data entry and analysis and concentrated on  
21  
22 presentation of the results. Dr. Anup Ghimire and Dr. Suman Bahadur Singh were involved in  
23  
24 the critical review of the final report and provided necessary feedback.  
25  
26  
27  
28

### 29 30 **What this paper adds** 31

32  
33 This study highlights upon the burden of tobacco use that still exists among the adolescent  
34  
35 students despite the endorsement of anti tobacco law in Nepal in 2011.  
36  
37

38  
39 Ethnicity was significantly associated with tobacco use as adolescent students belonging to  
40  
41 Janajati ethnicity had greater likelihood of using tobacco products compared to  
42  
43 Brahmins/Chhetris.  
44  
45

### 46 47 **Data sharing statement** 48

49  
50 Extra data is available by emailing Dr. Pranil Man Singh Pradhan (pranil.pradhan@gmail.com)  
51  
52  
53  
54  
55  
56  
57  
58  
59  
60

## References

1. Detels R, Beaglehole R, Lansang MA et al. Oxford Textbook of Public Health. Oxford University Press 2009
2. Warren CW, Jones NR, Eriksen MP et al for the Global Tobacco Surveillance System (GTSS) collaborative group. Patterns of global tobacco use in young people and implications for future chronic disease burden in adults. *Lancet* 2006;367:749-753
3. WHO. Office for South-East Asia (SEARO). Profile on Implementation of WHO Framework Convention on Tobacco Control in the South-East Asia Region. New Delhi, India. 2011
4. Pandey MR, Pathak RP, Shrestha S et al. National Global Youth Tobacco Survey (GYTS) and National Global School Personnel Survey (GSPS) in Nepal 2007
5. Rachiotis G, Muula AS, Rudatsikira E et al. Factors associated with adolescent cigarette smoking in Greece: Results from a cross sectional study (GYTS Study). *BMC Public Health* 2008;8:313
6. Mohan S, Sarma PS, Thankappan KR. Access to Pocket money and low educational performance predict tobacco use among adolescent boys in Kerala, India. *Preventive Medicine* 2005;41:685-692
7. Sreeramareddy CT, Kishore PV, Paudel J et al. Prevalence, distribution and correlates of tobacco smoking and chewing in Nepal: a secondary data analysis of Nepal Demographic and Health Survey-2006. *Subst Abuse Treat Prev Policy* 2011;6(33)

- 1  
2  
3 8. Sharma R, Grover VL, Chaturvedi S. Tobacco Use Among Adolescent Students and the  
4  
5 Influence of Role Models. *Indian J Community Med* 2010;35(2)  
6  
7
- 8  
9 9. Paudel D, Pathak RP. Tobacco Use among Adolescent Students in Secondary Schools of  
10  
11 Pokhara Sub Metropolitan City. *J Nepal Health Res Counc* 2003;1(2)  
12  
13
- 14 10. Kapoor SK, Anand K, Kumar G. Prevalence of Tobacco Use Among School and College  
15  
16 Going Adolescents of Haryana. *Indian J Pediatr* 1995;62:461-466  
17  
18
- 19  
20 11. Soteriades ES, Spanoudis G, Talias MA et al. Children's loss of autonomy over smoking: the  
21  
22 global youth tobacco survey. *Tob Control* 2011;20:201-206  
23  
24
- 25  
26 12. Aryal UR, Deuba K, Subedi A et al. Prevalence and Determinants of Cigarette Students of  
27  
28 Kathmandu Valley. *Asian Journal of Medical Sciences* 2010;1:53-58  
29  
30
- 31  
32 13. Narain R, Sardana S, Gupta S et al. Age at initiation & prevalence of tobacco use among  
33  
34 school children in Noida, India: A cross-sectional questionnaire based survey. *Indian J Med Res*  
35  
36 2011;133(3):300-307  
37  
38
- 39  
40 14. Pradeepkumar AS, Mohan S, Gopalakrishnan P et al. Tobacco use in Kerala: findings from  
41  
42 three recent studies. *Natl Med J India* 2005;18:148-153  
43  
44
- 45  
46 15. WHO. What about boys: A literature review on the health and development of adolescent  
47  
48 boys. Geneva: WHO:2002  
49
- 50  
51 16. Niraula SR. Tobacco Use among Women in Dharan, Eastern Nepal. *J Health Popul Nutr*  
52  
53 2004;22(1):68-74  
54  
55  
56  
57  
58  
59  
60

1  
2  
3 17. Population Division Government of Nepal Ministry of Health and Population. Nepal  
4  
5 Adolescent and Youth Survey 2010/11 Highlights  
6  
7

8  
9 18. Chloe MK, Kiting AS, Lin HS et al. The Youth Tobacco Epidemic in Asia. *East-West Center*  
10  
11 *Working Papers Population Series* 2001;108-117  
12  
13

14 **19. Central Bureau of Statistics. Population Monograph of Nepal Volume 1 2003. National**  
15  
16 **Planning Commission. Government of Nepal**  
17  
18  
19  
20  
21  
22  
23  
24  
25  
26  
27  
28  
29  
30  
31  
32  
33  
34  
35  
36  
37  
38  
39  
40  
41  
42  
43  
44  
45  
46  
47  
48  
49  
50  
51  
52  
53  
54  
55  
56  
57  
58  
59  
60

**STROBE 2007 (v4) checklist of items to be included in reports of observational studies in epidemiology\***  
**Checklist for cohort, case-control, and cross-sectional studies (combined)**

| Section/Topic             | Item # | Recommendation                                                                                                                                                                                                                                                                                                                                                                                                                                                         | Reported on page # |
|---------------------------|--------|------------------------------------------------------------------------------------------------------------------------------------------------------------------------------------------------------------------------------------------------------------------------------------------------------------------------------------------------------------------------------------------------------------------------------------------------------------------------|--------------------|
| Title and abstract        | 1      | (a) Indicate the study’s design with a commonly used term in the title or the abstract                                                                                                                                                                                                                                                                                                                                                                                 | 3                  |
|                           |        | (b) Provide in the abstract an informative and balanced summary of what was done and what was found                                                                                                                                                                                                                                                                                                                                                                    | 3-4                |
| <b>Introduction</b>       |        |                                                                                                                                                                                                                                                                                                                                                                                                                                                                        |                    |
| Background/rationale      | 2      | Explain the scientific background and rationale for the investigation being reported                                                                                                                                                                                                                                                                                                                                                                                   | 5                  |
| Objectives                | 3      | State specific objectives, including any pre-specified hypotheses                                                                                                                                                                                                                                                                                                                                                                                                      | 6                  |
| <b>Methods</b>            |        |                                                                                                                                                                                                                                                                                                                                                                                                                                                                        |                    |
| Study design              | 4      | Present key elements of study design early in the paper                                                                                                                                                                                                                                                                                                                                                                                                                | 6                  |
| Setting                   | 5      | Describe the setting, locations, and relevant dates, including periods of recruitment, exposure, follow-up, and data collection                                                                                                                                                                                                                                                                                                                                        | 6-7                |
| Participants              | 6      | (a) <i>Cohort study</i> —Give the eligibility criteria, and the sources and methods of selection of participants. Describe methods of follow-up<br><i>Case-control study</i> —Give the eligibility criteria, and the sources and methods of case ascertainment and control selection. Give the rationale for the choice of cases and controls<br><i>Cross-sectional study</i> —Give the eligibility criteria, and the sources and methods of selection of participants | 6                  |
|                           |        | (b) <i>Cohort study</i> —For matched studies, give matching criteria and number of exposed and unexposed<br><i>Case-control study</i> —For matched studies, give matching criteria and the number of controls per case                                                                                                                                                                                                                                                 |                    |
| Variables                 | 7      | Clearly define all outcomes, exposures, predictors, potential confounders, and effect modifiers. Give diagnostic criteria, if applicable                                                                                                                                                                                                                                                                                                                               | 7                  |
| Data sources/ measurement | 8*     | For each variable of interest, give sources of data and details of methods of assessment (measurement). Describe comparability of assessment methods if there is more than one group                                                                                                                                                                                                                                                                                   | 6-7                |
| Bias                      | 9      | Describe any efforts to address potential sources of bias                                                                                                                                                                                                                                                                                                                                                                                                              | 7                  |
| Study size                | 10     | Explain how the study size was arrived at                                                                                                                                                                                                                                                                                                                                                                                                                              | 6                  |
| Quantitative variables    | 11     | Explain how quantitative variables were handled in the analyses. If applicable, describe which groupings were chosen and why                                                                                                                                                                                                                                                                                                                                           | 7                  |
| Statistical methods       | 12     | (a) Describe all statistical methods, including those used to control for confounding                                                                                                                                                                                                                                                                                                                                                                                  | 7                  |
|                           |        | (b) Describe any methods used to examine subgroups and interactions                                                                                                                                                                                                                                                                                                                                                                                                    | 7                  |
|                           |        | (c) Explain how missing data were addressed                                                                                                                                                                                                                                                                                                                                                                                                                            | 8                  |
|                           |        | (d) <i>Cohort study</i> —If applicable, explain how loss to follow-up was addressed<br><i>Case-control study</i> —If applicable, explain how matching of cases and controls was addressed                                                                                                                                                                                                                                                                              |                    |

|                          |     |                                                                                                                                                                                                              |       |
|--------------------------|-----|--------------------------------------------------------------------------------------------------------------------------------------------------------------------------------------------------------------|-------|
|                          |     | <i>Cross-sectional study</i> —If applicable, describe analytical methods taking account of sampling strategy                                                                                                 |       |
|                          |     | (e) Describe any sensitivity analyses                                                                                                                                                                        |       |
| <b>Results</b>           |     |                                                                                                                                                                                                              |       |
| Participants             | 13* | (a) Report numbers of individuals at each stage of study—eg numbers potentially eligible, examined for eligibility, confirmed eligible, included in the study, completing follow-up, and analysed            | 8     |
|                          |     | (b) Give reasons for non-participation at each stage                                                                                                                                                         | 8     |
|                          |     | (c) Consider use of a flow diagram                                                                                                                                                                           |       |
| Descriptive data         | 14* | (a) Give characteristics of study participants (eg demographic, clinical, social) and information on exposures and potential confounders                                                                     | 8-9   |
|                          |     | (b) Indicate number of participants with missing data for each variable of interest                                                                                                                          |       |
|                          |     | (c) <i>Cohort study</i> —Summarise follow-up time (eg, average and total amount)                                                                                                                             |       |
| Outcome data             | 15* | <i>Cohort study</i> —Report numbers of outcome events or summary measures over time                                                                                                                          |       |
|                          |     | <i>Case-control study</i> —Report numbers in each exposure category, or summary measures of exposure                                                                                                         |       |
|                          |     | <i>Cross-sectional study</i> —Report numbers of outcome events or summary measures                                                                                                                           | 10    |
| Main results             | 16  | (a) Give unadjusted estimates and, if applicable, confounder-adjusted estimates and their precision (eg, 95% confidence interval). Make clear which confounders were adjusted for and why they were included | 10-12 |
|                          |     | (b) Report category boundaries when continuous variables were categorized                                                                                                                                    |       |
|                          |     | (c) If relevant, consider translating estimates of relative risk into absolute risk for a meaningful time period                                                                                             |       |
| Other analyses           | 17  | Report other analyses done—eg analyses of subgroups and interactions, and sensitivity analyses                                                                                                               | 13-14 |
| <b>Discussion</b>        |     |                                                                                                                                                                                                              |       |
| Key results              | 18  | Summarise key results with reference to study objectives                                                                                                                                                     | 14-16 |
| Limitations              | 19  | Discuss limitations of the study, taking into account sources of potential bias or imprecision. Discuss both direction and magnitude of any potential bias                                                   | 17    |
| Interpretation           | 20  | Give a cautious overall interpretation of results considering objectives, limitations, multiplicity of analyses, results from similar studies, and other relevant evidence                                   | 17    |
| Generalisability         | 21  | Discuss the generalisability (external validity) of the study results                                                                                                                                        | 17    |
| <b>Other information</b> |     |                                                                                                                                                                                                              |       |
| Funding                  | 22  | Give the source of funding and the role of the funders for the present study and, if applicable, for the original study on which the present article is based                                                |       |

\*Give information separately for cases and controls in case-control studies and, if applicable, for exposed and unexposed groups in cohort and cross-sectional studies.

**Note:** An Explanation and Elaboration article discusses each checklist item and gives methodological background and published examples of transparent reporting. The STROBE checklist is best used in conjunction with this article (freely available on the Web sites of PLoS Medicine at <http://www.plosmedicine.org/>, Annals of Internal Medicine at <http://www.annals.org/>, and Epidemiology at <http://www.epidem.com/>). Information on the STROBE Initiative is available at [www.strobe-statement.org](http://www.strobe-statement.org).



**Tobacco Use and Associated Factors among Adolescent Students in Dharan, Eastern Nepal: A Cross Sectional Questionnaire Survey**

|                                 |                                                                                                                                                                                                                                                                                                                                                                                                                                                                                                                                                         |
|---------------------------------|---------------------------------------------------------------------------------------------------------------------------------------------------------------------------------------------------------------------------------------------------------------------------------------------------------------------------------------------------------------------------------------------------------------------------------------------------------------------------------------------------------------------------------------------------------|
| Journal:                        | <i>BMJ Open</i>                                                                                                                                                                                                                                                                                                                                                                                                                                                                                                                                         |
| Manuscript ID:                  | bmjopen-2012-002123.R2                                                                                                                                                                                                                                                                                                                                                                                                                                                                                                                                  |
| Article Type:                   | Research                                                                                                                                                                                                                                                                                                                                                                                                                                                                                                                                                |
| Date Submitted by the Author:   | 01-Jan-2013                                                                                                                                                                                                                                                                                                                                                                                                                                                                                                                                             |
| Complete List of Authors:       | Pradhan, Pranil; B.P.Koirala Institute of Health Sciences, School of Public Health and Community Medicine<br>Niraula, Surya; B.P.Koirala Institute of Health Sciences, School of Public Health and Community Medicine<br>Ghimire, Anup; B.P.Koirala Institute of Health Sciences, School of Public Health and Community Medicine<br>Singh, Suman; B.P.Koirala Institute of Health Sciences, School of Public Health and Community Medicine<br>Pokharel, Paras; B.P.Koirala Institute of Health Sciences, School of Public Health and Community Medicine |
| <b>Primary Subject Heading</b>: | Public health                                                                                                                                                                                                                                                                                                                                                                                                                                                                                                                                           |
| Secondary Subject Heading:      | Smoking and tobacco                                                                                                                                                                                                                                                                                                                                                                                                                                                                                                                                     |
| Keywords:                       | PUBLIC HEALTH, Substance misuse < PSYCHIATRY, PREVENTIVE MEDICINE                                                                                                                                                                                                                                                                                                                                                                                                                                                                                       |
|                                 |                                                                                                                                                                                                                                                                                                                                                                                                                                                                                                                                                         |

SCHOLARONE™  
Manuscripts



**Title:** Tobacco Use and Associated Factors among Adolescent Students in Dharan, Eastern Nepal: A Cross Sectional Questionnaire Survey

**Corresponding Author:**

Dr. Prnil Man Singh Pradhan

Post Graduate Student (Community Medicine and Tropical Diseases)

School of Public Health and Community Medicine

B.P. Koirala Institute of Health Sciences (BPKIHS)

Dharan, Nepal

Phone: 9771025-525555-2626

P.O. Box 7053

Email: prnil.pradhan@gmail.com

**Co authors:**

|    | <b>Co authors' Name</b>  | <b>Designation</b>   | <b>Department</b>                                                     |
|----|--------------------------|----------------------|-----------------------------------------------------------------------|
| 1. | Dr. Paras Kumar Pokharel | Professor and Chief  | School of Public Health and Community Medicine, BPKIHS, Dharan, Nepal |
| 2. | Dr. Surya Raj Niraula    | Additional Professor | School of Public Health and Community Medicine, BPKIHS, Dharan, Nepal |
| 3. | Dr. Anup Ghimire         | Associate Professor  | School of Public Health and Community Medicine, BPKIHS, Dharan, Nepal |
| 4. | Dr. Suman Bahadur Singh  | Associate Professor  | School of Public Health and Community Medicine, BPKIHS, Dharan, Nepal |

**Keywords:** tobacco use, adolescent students, Nepal

**Word Count:** 3525

## Article Summary

### 1. Article focus

- What is the prevalence of tobacco use among the adolescent students of Dharan after the legalization of anti tobacco directives in Nepal?
- What are the factors associated with tobacco use among the students?

### 2. Key messages

- Tobacco use is still prevalent among the adolescent students of Dharan despite the existence of anti-tobacco regulations in the country.
- Tobacco focussed interventions should target vulnerable groups to prevent uptake of the habit and support abstinence among the users taking the factors found significant in this study

### 3. Strengths

- Use of a standard questionnaire enabled our study for comparison with other studies

### 4. Limitations

- Since tobacco use was assessed by self administered questionnaire, chances of bias in responses exist.
- Tobacco use status was not validated by biomarkers in our study.
- Smaller sample size limited our study to school going adolescents only.

1  
2  
3  
4  
5  
6  
7  
8  
9  
10  
11  
12  
13  
14  
15  
16  
17  
18  
19  
20  
21  
22  
23  
24  
25  
26  
27  
28  
29  
30  
31  
32  
33  
34  
35  
36  
37  
38  
39  
40  
41  
42  
43  
44  
45  
46  
47  
48  
49  
50  
51  
52  
53  
54  
55  
56  
57  
58  
59  
60

- The temporal association between the independent variables and tobacco use could not be established due to the study design being cross sectional.

For peer review only

1  
2  
3 **Tobacco Use and Associated Factors among Adolescent Students in Dharan, Eastern**  
4  
5 **Nepal: A Cross Sectional Questionnaire Survey**  
6  
7

8  
9 Pradhan PMS<sup>1</sup>, , Niraula SR<sup>2</sup>, Ghimire A<sup>3</sup>, Singh SB<sup>3</sup>, Pokharel PK<sup>4</sup>  
10

11  
12 (<sup>1</sup>Junior Resident, <sup>2</sup> Additional Professor, <sup>3</sup> Associate Professor, <sup>4</sup> Professor  
13

14 School of Public Health and Community Medicine, BPKIHS)  
15  
16

17  
18 **Abstract**  
19

20  
21 **Introduction:** The tobacco use among the youth, in both smoking and smokeless forms, is quite  
22  
23 high in the South East Asia region. Tobacco use is a major proven risk factor and contributes  
24  
25 substantially to the rising epidemic of non communicable diseases.  
26  
27

28  
29 **Objectives:** To estimate the prevalence of tobacco use and determine associated factors among  
30  
31 adolescent students of Dharan municipality  
32  
33

34  
35 **Design:** Cross sectional study  
36  
37

38  
39 **Setting:** Secondary and higher secondary schools of Dharan municipality in Sunsari district of  
40  
41 Nepal  
42

43  
44 **Participants:** Students in middle (14-15 years) and late adolescence (16-19 years) from grades  
45  
46 9, 10, 11 and 12 were included.  
47  
48

49  
50 **Primary outcome measure:** Ever tobacco use which was defined as one who had not used any  
51  
52 form of tobacco in the past one month but had tried in the past.  
53  
54  
55  
56  
57  
58  
59  
60

1  
2  
3 **Methodology:** Self administered questionnaire adapted from Global Youth Tobacco Survey was  
4 used to assess tobacco use among the representative sample of 1312 adolescent students selected  
5 by stratified random sampling from July 2011 to July 2012.  
6  
7

8  
9  
10  
11 **Results:** Of the total 1454 students, 1312 students completed the questionnaires giving the  
12 response rate of 90.23%. Prevalence of ever use of any tobacco product was 19.7% (95% CI:  
13 17.7-21.6). More than half of the tobacco users (51.9%) preferred to consume tobacco in public  
14 places whereas almost a third (75.6%) of the consumers purchased tobacco from the shops.  
15  
16  
17  
18  
19  
20  
21  
22  
23  
24  
25  
26  
27  
28  
29  
30  
31  
32  
33  
34  
35  
36  
37  
38  
39  
40  
41  
42  
43  
44  
45  
46  
47  
48  
49  
50  
51  
52  
53  
54  
55  
56  
57  
58  
59  
60

Multivariate analysis showed that tobacco use was associated with late adolescence (OR: 1.89; 95% CI: 1.25-2.85), male gender (OR: 11.81; 95% CI: 7.52-18.54), Janajati ethnicity (OR: 2.03; 95% CI: 1.37-3.00) and receiving pocket money  $\geq$  NRs.500 per month (OR: 1.48; 95% CI: 1.06-2.06).

**Conclusion:** Tobacco focussed interventions are required for school/college going students in order to promote cessation among users and prevent initiation, focusing on late adolescence, male gender, Janajati ethnicity and higher amount of pocket money.

## Introduction

Nearly 70% of the world's smokers live in low and middle income countries. **Nearly two-thirds of the world's smokers live in 10 countries, namely China, India, Indonesia, Russian Federation, the United States, Japan, Brazil, Bangladesh, Germany and Turkey.** [1] Unless a large number of current smokers in these countries quit, it is estimated that smoking will be causing 10 million deaths per year worldwide by the 2020s or early 2030s. [2]

The tobacco use among the youth, in both smoking and smokeless forms, is quite high in the South East Asia region including Nepal. One of the reasons for such high use could be the creative and targeted marketing strategies of various tobacco companies and its weak regulation. Abundant tobacco production, weak enforcement of tobacco control measures, easy accessibility and affordability of these products are other factors leading to the rise of the epidemic of tobacco use in the youth [3]. Although the exact burden of tobacco use among the youth has not been studied extensively in Nepal, a national Global Youth Tobacco Survey (GYTS) in 2007 reported that overall 7.9% of the students ever smoked cigarettes and 8% used other tobacco products [4]. Some of the factors known to be associated with tobacco use among adolescents are age, gender, having smoker friends or parents and the amount of pocket money [5-7].

The WHO has defined the adolescents as persons in the 10 to 19 years age group. It has also estimated that 70% of premature deaths among adults are due to behavioural patterns that emerge in adolescence including smoking, violence and sexual behaviour. Studies have shown that such risk taking behaviours begin to manifest from the middle adolescence (14-15 years of age) onwards [8]. The present study therefore, focussed on the specific groups of middle (14-15 years) and late adolescents (16-19 years).

1  
2  
3 The Government of Nepal had signed the Framework Convention on Tobacco Control (FCTC)  
4 on December 3, 2003 followed by its ratification by the House of Representatives on November  
5  
6  
7  
8 7, 2006. In what was regarded as a landmark in the nation's campaign against tobacco, the  
9  
10 government finally assented to the anti-tobacco directives of Tobacco Product Control and  
11  
12 Regulatory Act 2010 on November 4, 2011. This has reflected a strong will from the side of the  
13  
14 government to comply by objectives set out in the convention. A need was felt to estimate the  
15  
16 prevalence of tobacco use within the Nepalese youth who are the most vulnerable for adoption of  
17  
18 this habit in the background of recent endorsement of anti-tobacco directives by the government.  
19  
20 The present study was carried out with the objectives to estimate the prevalence of tobacco use  
21  
22 and determine associated factors among adolescent students of Dharan municipality of Sunsari  
23  
24 district of Nepal.  
25  
26  
27  
28  
29

## 30 **Methods**

### 31 32 33 **Description of study area**

34  
35  
36 Dharan is a major city in the Sunsari district in Eastern Region of Nepal located at an altitude of  
37  
38 1148 feet. It is situated on the foothills of the Mahabharat Range in the North with the southern  
39  
40 tip touching the edge of the Terai region. Dharan serves as a trading post between the hilly  
41  
42 region and the plains of the Terai. The foundation of modern Dharan was laid in 1902 with the  
43  
44 purpose to supply timber to the then East India Company. This small settlement grew steadily  
45  
46 over time to include diverse people from various ethnicities like Rai, Limbu, Gurung, Newar,  
47  
48 Brahmins, Chhetris and others. Dharan was once home to the British Gurkha Recruitment Center  
49  
50 which was established in 1953. Recruits from all over Nepal flocked to join the British Gurkhas.  
51  
52  
53  
54  
55 Thus the face of Dharan was drastically altered. There was a surge in population with recruits  
56  
57  
58  
59  
60

1  
2  
3 bringing their families and others who came to seek employment and exploit business  
4 opportunities. As a result, Dharan started to emerge as one of the biggest towns in Eastern Nepal.  
5  
6  
7

### 8 9 **Study design**

10  
11 This was a cross sectional study conducted in Dharan Municipality of Sunsari district of Nepal  
12 from July 2011 to July 2012.  
13  
14

### 15 16 17 **Sample size and sampling method**

18  
19 From a similar study in South Delhi conducted among adolescents of 14-19 years, the overall  
20 prevalence of tobacco use (smoking and smokeless forms) was 20.9% [8]. We calculated the  
21 minimum sample size to estimate the prevalence for 95% confidence limits at an allowable error  
22 of 10% to be 1454 individuals.  
23  
24  
25  
26  
27  
28  
29

30  
31 Students in middle (14-15 years) and late adolescence (16-19 years) from grades 9, 10, 11 and 12  
32 in different schools of Dharan Municipality were included in this study. Current list of schools in  
33 Dharan was obtained from Private and Boarding School's Organization, Nepal (PABSON). From  
34 the list of 87 schools (80 private and 7 government schools), stratified random sampling with  
35 proportionate allocation technique was carried out according to the type of schools. Since the  
36 number of students in grades 9 to 12 in each school was not known, a number of 100 students per  
37 school were assumed. This gave the total assumed population size to be 8700. Based on  
38 population proportionate to size, 1337 students from private and 117 students from government  
39 schools were included in the study sample. We randomly selected 15 private schools and 2  
40 government schools in order to enroll the calculated number of students assuming 100 students  
41  
42  
43  
44  
45  
46  
47  
48  
49  
50  
51  
52  
53  
54  
55  
56  
57  
58  
59  
60



1  
2  
3 from each school. This was followed by random selection of classes from the selected schools.  
4  
5 All the students from the selected classes were included in the study.  
6  
7

### 8 9 **Data collection**

10  
11 Data collection was carried out using a self administered questionnaire adapted from Global  
12 Youth Tobacco Survey. The questionnaire to be used was pretested among the adolescent  
13 students in a different area and necessary corrections and modifications were made in order to  
14 make it more understandable for the students. An elaborative briefing on the questionnaire was  
15 done to all the students of the class prior to data collection.  
16  
17  
18  
19  
20  
21  
22  
23

### 24 25 **Definition of the variables**

26  
27  
28 Ever user: Ever user was defined as one who had not used any form of tobacco (smoked or  
29 chewed) in the past one month but had tried in the past. To assess the ever use participants were  
30 asked, "Prior to the past 30 days, have you ever smoked or chewed tobacco?" Affirmative  
31 response to this question was followed up with questions on type of tobacco used. Ever tobacco  
32 use was considered as the dependent variable [7]. The following explanatory variables were  
33 chosen based on the previous literature: age group [8], gender [5,7], type of school [6,9], grade  
34 [6], religion [7], ethnicity [9], type of family [8], parental occupation [13], pocket money [5-7]  
35 and parental tobacco use [5,7]. Type of school was categorized into private and government as  
36 more number of smokers was reported in private than government school [9]. Ethnic groups  
37 were broadly classified into Brahmin/Chhetri, Janajati, Dalit and Terai Major Caste as each  
38 ethnic group is a collection of many castes which have common customs, socio-economic,  
39 cultural and traditional values. Type of family was divided into nuclear and joint. The family  
40  
41  
42  
43  
44  
45  
46  
47  
48  
49  
50  
51  
52  
53  
54  
55  
56  
57  
58  
59  
60

1  
2  
3 with a married couple and their dependent children was nuclear whereas family with a number of  
4 married couples and their children living together in the same household was considered joint  
5 [25]. Grade was incorporated because transition from secondary to higher secondary level  
6 education (Grade 11 and 12) is a major challenge and stress to all students in context of current  
7 education system of Nepal. We used parental occupation as one of the explanatory variables  
8 since it was not possible to assess valid socioeconomic status of the family from the students.  
9  
10 The pocket money was dichotomized based on the median amount received per month as there  
11 was a wide variation in the amounts and data was not normally distributed.  
12  
13  
14  
15  
16  
17  
18  
19  
20  
21  
22

### 23 **Data analysis**

24  
25  
26 Collected data were entered into MS Windows Excel in the form of codes. Analysis was  
27 performed using Statistical Package for Social Sciences (SPSS) 17 version. In bivariate analysis  
28 with categorical variables, Chi-Square test was applied. Binary logistic regression analysis with  
29 backward elimination was used to determine the independence of associations observed in  
30 bivariate analysis by controlling for potential confounding factors. Goodness of fit of the model  
31 was tested by Hosmer and Lemeshow test. Probability of significance was set at 5%. Mann  
32  
33  
34  
35  
36  
37  
38  
39  
40  
41  
42  
43  
44  
45  
46  
47  
48  
49  
50  
51  
52  
53  
54  
55  
56  
57  
58  
59  
60  
Whitney U test was applied to detect significant differences for non parametric data.

### 50 **Ethical clearance**

51  
52  
53  
54  
55  
56  
57  
58  
59  
60  
Ethical clearance was acquired from the ethical committee of B.P. Koirala Institute of Health Sciences at the start of the study. Informed consent was taken from all the participants. We

1  
2  
3 obtained written permission from the school authorities before interaction with the students. All  
4  
5 the students present at the time of the visit were included in the study. Participation in the study  
6  
7 was entirely voluntary and full confidentiality of the responses was maintained after clear  
8  
9 explanation of the objectives of the study. Absence of any school personnel or teacher at the time  
10  
11 of data collection was ensured in order to prevent response bias.  
12  
13

## 14 15 16 **Results**

17  
18  
19 Of the total sample of 1454, 1312 students completed the questionnaires giving the response rate  
20  
21 of 90.23%. Among the remaining questionnaires, eighty were incomplete whereas sixty two did  
22  
23 not match the age criteria therefore were excluded from the data analyses.  
24  
25

### 26 27 *Socio-demographic characteristics*

28  
29  
30 Among the participants, median age was 16 years (Inter-quartile range 15-17 years). Proportion  
31  
32 of students in the age group of middle adolescence (14-15 years) and late adolescence (16-19  
33  
34 years) were almost equal. Age showed positive correlation with grade (Pearson correlation  
35  
36 coefficient=0.756,  $p<0.001$ ). Participation was almost equal from both the gender (Male:  
37  
38 Female=1.1:1). Participants who were Janajati by ethnicity were predominant. Other religions  
39  
40 comprised of Christianity, Muslim, Jainism, Sahajyog and Heavenly path or Premwaad (Lovism).  
41  
42

43  
44 (Table 1)  
45  
46  
47  
48  
49  
50  
51  
52  
53  
54  
55  
56  
57  
58  
59  
60

**Table 1: Socio-demographic characteristics of the adolescent students in Dharan, Sunsari**  
(N=1312)

| Characteristics          | Number | Percentage |
|--------------------------|--------|------------|
| <b>Age Group (years)</b> |        |            |
| 14-15                    | 648    | 49.4       |
| 16-19                    | 664    | 50.6       |
| <b>Gender</b>            |        |            |
| Male                     | 694    | 52.9       |
| Female                   | 618    | 47.1       |
| <b>School</b>            |        |            |
| Private                  | 1176   | 89.6       |
| Government               | 136    | 10.4       |
| <b>Education Level</b>   |        |            |
| 9                        | 551    | 42         |
| 10                       | 422    | 32.2       |
| 11                       | 174    | 13.3       |
| 12                       | 165    | 12.6       |
| <b>Caste/Ethnicity*</b>  |        |            |
| Janajati                 | 816    | 62.2       |
| Brahmin/Chhetri          | 335    | 25.5       |
| Terai Major Caste        | 83     | 6.3        |
| Dalit                    | 78     | 5.9        |

**Religion**

|                       |            |            |
|-----------------------|------------|------------|
| Hindu                 | 1038       | 79.1       |
| <b>Buddhist/Kirat</b> | <b>126</b> | <b>9.6</b> |
| <b>Kirat</b>          | <b>80</b>  | <b>6.1</b> |
| Others                | 68         | 5.2        |

\*Janajati: Rai, Limbu, Magar, Newar; Brahmin/Chhetri: Baral, Neupane, Oli, Paudel  
Terai Major Caste: Agrawal, Das, Jha, Roy, Sah, Yadav; Dalit: Bafna, Kuki, Mardi,  
Tamli etc. [19]

Of the respondents' fathers who were alive, majority (34.2%) were involved in business. Almost four-fifths (80.5%) of the respondent's mothers who were alive were housewives and farmers.

*Prevalence of ever tobacco use*

The prevalence of ever tobacco use was 19.7% (95% CI: 17.7-21.6) in our study. The prevalence among males and females was 33.6% (95% CI: 30.2-36.9) and 4.0% (95% CI: 2.6-5.3) respectively. Among the ever smokers, 98.7% (232/235) were smoking cigarettes whereas 1.3% (3/235) were smoking hukka or cigar. Median number of sticks smoked per day was 2 (IQR 1-3). Among the ever chewers of tobacco, 34.28% (36/105) were found to be consuming Gutkha (a mixture of crushed areca nut, tobacco, catechu, paraffin, lime and sweet or savory flavorings), 26.66% (28/105) Paan masala (a balanced mixture of betel leaf with lime, areca nut, clove, cardamom, mint, tobacco, essence and other ingredients), 7.61% (8/105) Surti (dried tobacco leaves for chewing), 21.90% (23/105) Khaini (mixture of sun-dried tobacco and slaked lime) and 9.52% (10/105) Zarda (small pieces of tobacco leaves with slaked lime and spices boiled and dried).

1  
2  
3 The median age of initiating tobacco smoking and chewing was 14 years (IQR= 13-15). The  
4 mean age of initiating tobacco smoking was 13.79 years (SD = 2.21) whereas that of initiating  
5 tobacco chewing was 13.58 years (SD = 2.11). More than half of the users (51.9%) preferred to  
6 consume tobacco in public places followed by friend's house (14%). Almost a third (75.6%) of  
7 the users purchased tobacco directly from the shops. Majority of the students started using  
8 tobacco out of curiosity (41.1%) followed by to relieve tension (26.7%) and peer pressure  
9 (25.5%).  
10  
11  
12  
13  
14  
15  
16  
17  
18  
19

### 20 *Pocket money and expenditure on tobacco*

21  
22 This study found the median expenditure on tobacco to be Nepalese Rupees (NRs). 100 per  
23 month (Inter-quartile range 30-200) (NRs. 3.33 or 0.037 United States Dollar per day), which  
24 was one fifth of their pocket money (Median 500, Inter-quartile range 300-1000). Median pocket  
25 money (NRs.) received per month by the ever users (Median=500, IQR=300-1000) was  
26 significantly different than the non users (Median= 500, IQR=247.50-600) ( $p<0.001$ ).  
27  
28  
29  
30  
31  
32  
33  
34  
35

### 36 *Bi-variate analysis*

37  
38 In the bivariate analysis, students in the late adolescence were more likely to ever use tobacco  
39 than those in middle adolescence (OR= 2.24; 95% CI: 1.67-3.01). Males were more likely to  
40 ever use tobacco than females (OR= 11.98; 95% CI: 7.79-18.43). Students in grade 10 had more  
41 than two times the odds of ever using tobacco than those in grade 9 (OR= 2.17; 95% CI: 1.56-  
42 3.02). Compared to Brahmins/Chhetris, students belonging to Janajati ethnicity were more likely  
43 to ever use tobacco (OR=1.76; 95% CI: 1.23-2.52). Students from nuclear families were less  
44 likely to ever use tobacco than those from joint families (OR=0.75; 95% CI: 0.56-1.00). Students  
45  
46  
47  
48  
49  
50  
51  
52  
53  
54  
55  
56  
57  
58  
59  
60

whose fathers were working abroad in skilled or semi skilled work were more likely to ever use tobacco than those whose fathers were in service or professionals (OR=1.69; 95% CI:1.13-2.52). Students who received pocket money of more than or equal to NRs. 500 per month were more likely to ever use tobacco than those who received less (OR=1.44; 95% CI: 1.08-1.92). (Table 2)

**Table 2: Different characteristics of participants and tobacco use: Bi-variate analysis**

| Characteristics          | Ever User<br>N(%) | Non User<br>N(%) | p value | Crude OR<br>(95%CI) |
|--------------------------|-------------------|------------------|---------|---------------------|
| <b>Age Group (years)</b> |                   |                  |         |                     |
| 14-15                    | 87 (13.4)         | 561 (86.6)       | <0.001  | 1                   |
| 16-19                    | 171 (25.8)        | 493 (74.2)       |         | 2.24 (1.67-3.01)    |
| <b>Gender</b>            |                   |                  |         |                     |
| Female                   | 25 (4.0)          | 593 (96.0)       | <0.001  | 1                   |
| Male                     | 233 (33.6)        | 461 (66.4)       |         | 11.98 (7.79-18.43)  |
| <b>Type of School</b>    |                   |                  |         |                     |
| Private                  | 230 (19.6)        | 946 (80.4)       | 0.775   | 1                   |
| Government               | 28 (20.6)         | 108 (79.4)       |         | 1.07 (0.67-1.69)    |
| <b>Grade</b>             |                   |                  |         |                     |
| 9                        | 82 (14.9)         | 469 (85.1)       | <0.001  | 1                   |
| 10                       | 116 (27.5)        | 306 (72.5)       |         | 2.17 (1.56-3.02)    |
| 11                       | 29 (16.7)         | 145 (83.3)       |         | 1.14 (0.70-1.86)    |

|                                     |            |            |        |                  |
|-------------------------------------|------------|------------|--------|------------------|
| 12                                  | 31 (18.8)  | 134 (81.2) |        | 1.32 (0.82-2.13) |
| <b>Religion</b>                     |            |            |        |                  |
| Hindu                               | 196 (18.9) | 842 (81.1) | 0.572  | 1                |
| Buddhist                            | 31 (24.6)  | 95 (74.4)  |        | 1.40 (0.89-2.21) |
| Kirat                               | 21 (26.3)  | 59 (73.8)  |        | 1.53 (0.88-2.65) |
| Others                              | 10 (14.7)  | 58 (85.3)  |        | 0.74 (0.35-1.53) |
| <b>Caste/Ethnicity</b>              |            |            |        |                  |
| Brahmin / Chhetri                   | 49 (14.6)  | 286 (85.4) | <0.001 | 1                |
| Janajati                            | 189 (23.2) | 627 (76.8) |        | 1.76 (1.23-2.52) |
| Dalit                               | 14 (17.9)  | 64 (82.1)  |        | 1.28 (0.63-2.56) |
| Terai Major Caste                   | 6 (7.2)    | 77 (92.8)  |        | 0.45 (0.17-1.16) |
| <b>Type of Family</b>               |            |            |        |                  |
| Joint                               | 97 (22.9)  | 327 (77.1) | 0.043  | 1                |
| Nuclear                             | 161 (18.1) | 727 (81.9) |        | 0.75 (0.56-1.00) |
| <b>Father's Occupation (n=1269)</b> |            |            |        |                  |
| Service/Professional                | 49 (16.6)  | 247 (83.4) | 0.002  | 1                |
| Rtd.Army/Unemployed                 | 16 (27.1)  | 43 (72.9)  |        | 1.88 (0.93-3.76) |
| Farmer                              | 23 (24.7)  | 70 (75.3)  |        | 1.66 (0.91-3.01) |
| Business                            | 67 (15.4)  | 367 (84.6) |        | 0.92 (0.60-1.40) |
| Foreign/Skilled/Semi Skilled        | 97 (25.1)  | 290 (74.9) |        | 1.69 (1.13-2.52) |
| <b>Mother's Occupation (n=1295)</b> |            |            |        |                  |
| Service/Professional                | 36 (21.1)  | 135 (78.9) | 0.983  | 1                |
| Foreign/Skilled/Semi Skilled        | 20 (24.4)  | 62 (75.6)  |        | 1.21 (0.62-2.36) |



1  
2  
3  
4  
5  
6  
7  
8  
9  
10  
11  
12  
13  
14  
15  
16  
17  
18  
19  
20  
21  
22  
23  
24  
25  
26  
27  
28  
29  
30  
31  
32  
33  
34  
35  
36  
37  
38  
39  
40  
41  
42  
43  
44  
45  
46  
47  
48  
49  
50  
51  
52  
53  
54  
55  
56  
57  
58  
59  
60

|                                  |            |            |              |                  |
|----------------------------------|------------|------------|--------------|------------------|
| Housewife/Farmer                 | 195 (18.7) | 847 (81.3) |              | 0.86 (0.57-1.31) |
| <b>Pocket Money/month (NRs.)</b> |            |            |              |                  |
| <500                             | 102 (16.6) | 511 (83.4) | <b>0.010</b> | 1                |
| ≥500                             | 156 (22.3) | 543 (77.7) |              | 1.44 (1.08-1.92) |
| Parental tobacco use             |            |            |              |                  |
| Absent                           | 139 (19.4) | 579 (80.6) | 0.760        | 1                |
| Present                          | 119 (20.0) | 475 (80.0) |              | 1.04 (0.79-1.38) |

### *Multivariate analysis*

After multivariate analysis, students in late adolescence (16-19 years) were more likely to be ever tobacco users compared to middle adolescence (14-15 years) (OR= 1.89; 95% CI: 1.25-2.85). Male were more likely to ever use tobacco compared to females (OR= 11.81; 95% CI: 7.52-18.54). The students in grade 10 were more likely to ever use tobacco than grade 9 (OR=1.51; 95% CI: 1.00-2.28) whereas those in grade 11 were less likely to ever use tobacco than grade 9 (OR=0.50; 95% CI: 0.27-0.93). Students from Janajati ethnicity were more than two times likely to be ever users of tobacco than those who were Brahmin/Chhetris (OR=2.03, CI=1.37-3.00). The adolescents who received pocket money of more than or equal to NRs.500 per month had higher odds of ever using tobacco compared to those who received less (OR= 1.48, CI= 1.06, 2.06). (Table 3)

**Table 3: Association of different variables with tobacco use among adolescent students:**  
**multivariate analysis (N=1312)**

| Characteristics          | Adjusted Odds Ratio (95% CI) |
|--------------------------|------------------------------|
| <b>Age Group (years)</b> |                              |
| 14-15                    | 1.00                         |
| 16-19                    | <b>1.89 (1.25,2.85)</b>      |
| <b>Gender</b>            |                              |
| Female                   | 1.00                         |
| Male                     | <b>11.81 (7.52, 18.54)</b>   |
| <b>Grade</b>             |                              |
| 9                        | 1.00                         |
| 10                       | 1.51 (1.00, 2.28)            |
| 11                       | <b>0.50 (0.27, 0.93)</b>     |
| 12                       | 0.69 (0.37, 1.29)            |
| <b>Caste/Ethnicity</b>   |                              |
| Brahmin/Chhetri          | 1.00                         |
| Janajati                 | <b>2.03 (1.37, 3.00)</b>     |
| Dalit                    | 1.76 (0.85, 3.65)            |
| Terai Major Caste        | 0.47 (0.18, 1.21)            |
| <b>Type of Family</b>    |                              |
| Joint                    | 1.00                         |
| Nuclear                  | 0.73 (0.52, 1.02)            |

**Pocket Money per month**

|      |                          |
|------|--------------------------|
| <500 | 1.00                     |
| ≥500 | <b>1.48 (1.06, 2.06)</b> |

---

*-2 Log likelihood=1001.860, Chi-square=11.015, df=8, p=0.201*

**Discussion**

National GYTS in Nepal in 2007 was conducted among students from 13-15 years age group only whereas our study included students from 14-19 years. Almost equal proportion of male (52.9%) and female (47.1%) students were involved in our study. Participants belonging to Janajati ethnicity were predominant in this study. Similar study from Pokhara, Nepal reported nearly equal proportion of males and females with predominance of Brahmin ethnicity [9].

The prevalence of ever use of tobacco in this study was more compared to a study from western Nepal [7]. Prevalence of ever smokers of tobacco (17.9%) was high compared to National GYTS where 7.9% of students had ever smoked [4]. Regarding tobacco chewing, prevalence in our study (8.0%) was low compared to similar study among college students from western Nepal (21.2%) [20]. Inclusion of students from secondary and higher secondary level in our study could have attributed to this difference in prevalence.

The mean age for tobacco use initiation (smoking and chewing) in our study was found to be in consistency with studies from Kathmandu, Noida, and Kerala, India where the mean ages of onset were 14.15, 12.4 and 13.2 years respectively [12-14]. Early and middle adolescence is more vulnerable for initiation of tobacco use hence; a target group is highlighted for early intervention to reduce the uptake of this habit.

1  
2  
3 Our study has shown that more than half of the adolescent tobacco users prefer public places as  
4 their most common location of tobacco use and shops as the most common source. Similar  
5 results have been obtained in the study from Pokhara, Nepal which showed that most of the  
6 respondents (66.7%) smoked in public places like tea stalls or restaurants and majority purchased  
7 it from the shops [7]. National GYTS in 2007 reported that more than two-third (69.5%) of the  
8 students were not refused tobacco purchase in stores because of their age [4]. According to a  
9 study from Kerala, India, the most preferred places for smoking were friends' house and public  
10 places [6]. Provision of unrestricted access to tobacco products in the shops especially to the  
11 adolescents including minors, and its open use in public places pose a great challenge to the  
12 implementation of the regulations of the anti tobacco law in Nepal.  
13  
14  
15  
16  
17  
18  
19  
20  
21  
22  
23  
24  
25  
26

27  
28 Curiosity, relieving tension and pressure from friends were the major reasons behind initiating  
29 tobacco use in this study. In developing countries, documented factors implicated in the initiation  
30 of tobacco use among youth include experimentation, peer pressure and feeling more matured  
31 [21].  
32  
33  
34  
35  
36  
37

38 We found that students in late adolescence were nearly two times more likely to consume  
39 tobacco compared to those in middle adolescence. Similar result was seen in a study from Kerala  
40 where students aged 16 years and above were nearly three times more likely to be tobacco users  
41 compared to those who were 13 years old (Adjusted OR=2.9, CI=1.6-5.3) [6]. Tobacco use is  
42 more common in later adolescence thus cessation attempts need to be focused in these groups.  
43  
44  
45  
46  
47  
48  
49

50 Type of family can influence tobacco use. Ever use of tobacco was two times more likely in  
51 students belonging to nuclear families compared to joint families (Adjusted OR=1.96, 95% CI:  
52 1.11-3.45) in a study from India [8]. In our study tobacco use was less likely among students  
53  
54  
55  
56  
57  
58  
59  
60

1  
2  
3 belonging to nuclear families. Close contact among parents and children in nuclear families  
4  
5 might play a protective role in taking up risky behavior like tobacco use.  
6  
7

8  
9 In context of Nepal, transition from secondary to higher secondary level education (Grade 11 and  
10  
11 12) is a major stress factor. Taking this into account, we took grade as a separate entity although  
12  
13 it was significantly correlated with age. Likelihood of ever using tobacco was less in grades 11  
14  
15 and 12 than lower grades in our study. The start of higher secondary level education presents  
16  
17 new peer groups and different environment which could have influenced the tobacco use among  
18  
19 the students.  
20  
21

22  
23  
24 Prevalence of ever tobacco use was more than eight times in the boys as compared to girls in our  
25  
26 study. Similar difference of prevalence between males and females was seen in other studies  
27  
28 conducted in Nepal and abroad [8-11]. Males were more likely to ever smoke than females in a  
29  
30 study from western Nepal (Adjusted OR=4.0; 95% CI=2.9-5.6) [22] and Haryana, India  
31  
32 (Adjusted OR= 4.67; 95% CI=1.91-11.4) [10]. Tobacco use can be considered as part of a  
33  
34 constellation of risk-taking behaviors that is more prevalent in the males [15]. In context of  
35  
36 Nepal, teen smoking is viewed as an acceptable behavior for boys but not for girls, especially  
37  
38 among the unmarried. Large proportions of teens in Asian countries, especially boys, pick up  
39  
40 smoking as a part of normal behavior associated with their transition to adulthood [23]. This  
41  
42 striking gender differences in tobacco use was also observed among Nepalese population aged  
43  
44 15 to 59 years [24]. However, the rising trend of tobacco use among the girls should not be  
45  
46 ignored. It has been mentioned that when the prevalence of smoking among teen girls increases  
47  
48 in Asian countries, it seems to increase first in metropolitan areas. Continuing modernization is  
49  
50 likely to narrow the gender differences in smoking and is likely to result in high prevalence of  
51  
52  
53  
54  
55  
56  
57  
58  
59  
60

1  
2  
3 smoking among teen girls in Asian countries [23]. Dharan, a town on the verge of rapid  
4  
5 urbanization is likely to face this scenario in the near future.  
6  
7

8  
9 Jajajatis were two times more likely to consume tobacco compared to Brahmins/Chhetris in our  
10  
11 study. Janajatis is the broad ethnic group comprising castes mainly from the hills of Nepal.  
12  
13 Tobacco chewing was significantly more among the hill native castes which included Rai,  
14  
15 Limbu, Magar, Tamang, Gurung whereas smoking was significantly higher among the hill  
16  
17 occupational castes which included Biswakarma, Pariyar and Sarki in a study conducted among  
18  
19 females population of Dharan [16]. Nepal Adolescent and Youth Survey (NAYS) in 2010  
20  
21 showed similar results in which relatively advantaged Janajatis had higher prevalence of liquor  
22  
23 (32.60%) and tobacco use (16.62%) followed by disadvantaged Janajatis (27.83% and 13.71%  
24  
25 respectively) [17]. The population of hill region is more diverse than the Terai region in its  
26  
27 ethnic, caste, and religious composition and the attitude towards smoking is more permissive  
28  
29 among the people from the hills [18]. This might be a possible explanation for the higher  
30  
31 prevalence of tobacco use seen among the Janajatis in various studies across Nepal including  
32  
33 ours.  
34  
35  
36  
37  
38  
39

40  
41 Greater likelihood of using tobacco with higher amount of pocket money was reflected in other  
42  
43 studies as well [5,6]. Having some amount of disposable money at hand might predispose the  
44  
45 adolescents towards use of tobacco by easing the access. However, asking for more pocket  
46  
47 money to buy tobacco products could be the reason behind the significance of the association for  
48  
49 which further studies are required.  
50  
51  
52

53  
54 Our study had few limitations. Even though the participation in the study was entirely voluntary  
55  
56 with an assurance of non disclosure of identity and confidentiality, chances of bias may occur in  
57  
58  
59  
60

1  
2  
3 the findings as the data was collected through self administered questionnaire. The assessment of  
4  
5 the tobacco use status was based entirely upon the response given by the subject believing that  
6  
7 false reporting was very unlikely. However this was not validated by biomarkers. Sample size of  
8  
9 the study was small and limited to school going adolescents only. The temporal association  
10  
11 between the independent variables and tobacco use could not be established due to the study  
12  
13 design being cross sectional.  
14  
15

### 16 17 18 **Conclusion** 19

20  
21 The study revealed tobacco use is prevalent among the adolescent students despite the existence  
22  
23 of anti-tobacco regulations in the country. Late adolescence, male gender, Janajati ethnicity and  
24  
25 higher pocket money were significantly associated with tobacco use. Taking these factors into  
26  
27 consideration, tobacco focussed interventions should target vulnerable groups to prevent uptake  
28  
29 of the habit and support abstinence among the users. Further researches are needed to explore the  
30  
31 vulnerability of certain ethnic groups towards tobacco use to generate an effective awareness  
32  
33 campaign.  
34  
35  
36  
37  
38

### 39 **Competing Interests** 40

41  
42 The author(s) declare that they have no competing interests.  
43  
44

### 45 **Acknowledgement** 46

47  
48 Our sincere appreciation goes to all the students who agreed to participate in this study and the  
49  
50 respected principals of the schools who allowed us to conduct this study by lending their  
51  
52 valuable time.  
53  
54  
55  
56  
57

### Contributorship statement

Dr. Pranil Man Singh Pradhan was involved in designing the protocol, collection, entering and analysis of data and preparation of the final document. Prof. Paras Kumar Pokharel was responsible for the overall review of the protocol and final report and provided critical analysis where needed. Dr. Surya Raj Niraula assisted in data entry and analysis and concentrated on presentation of the results. Dr. Anup Ghimire and Dr. Suman Bahadur Singh were involved in the critical review of the final report and provided necessary feedback.

### What this paper adds

This study highlights upon the prevalence of tobacco use that still exists among the adolescent students after the endorsement of anti tobacco law in Nepal in 2011.

Ethnicity was significantly associated with tobacco use as adolescent students belonging to Janajati ethnicity had greater likelihood of using tobacco products compared to Brahmins/Chhetris.

### Data sharing statement

Extra data is available by emailing Dr. Pranil Man Singh Pradhan (pranil.pradhan@gmail.com)

### References

1. Detels R, Beaglehole R, Lansang MA et al. Oxford Textbook of Public Health. Oxford University Press 2009



- 1  
2  
3 2. Warren CW, Jones NR, Eriksen MP et al for the Global Tobacco Surveillance System (GTSS)  
4  
5 collaborative group. Patterns of global tobacco use in young people and implications for future  
6  
7 chronic disease burden in adults. *Lancet* 2006;367:749-753  
8  
9
- 10  
11 3. WHO. Office for South-East Asia (SEARO). Profile on Implementation of WHO Framework  
12  
13 Convention on Tobacco Control in the South-East Asia Region. New Delhi, India.2011  
14  
15
- 16  
17 4. Pandey MR, Pathak RP, Shrestha S et al. National Global Youth Tobacco Survey (GYTS) and  
18  
19 National Global School Personnel Survey (GSPS) in Nepal 2007  
20  
21
- 22  
23 5. Rachiotis G, Muula AS, Rudatsikira E et al. Factors associated with adolescent cigarette  
24  
25 smoking in Greece: Results from a cross sectional study (GYTS Study). *BMC Public Health*  
26  
27 2008;8:313  
28  
29
- 30  
31 6. Mohan S, Sarma PS, Thankappan KR. Access to Pocket money and low educational  
32  
33 performance predict tobacco use among adolescent boys in Kerala, India. *Preventive Medicine*  
34  
35 2005;41:685-692  
36  
37
- 38  
39 7. Sreeramareddy CT, Kishore P, Paudel J, Menezes RG. Prevalence and correlates of tobacco  
40  
41 use amongst junior collegiate in twin cities of western Nepal: A cross-sectional, questionnaire-  
42  
43 based survey. *BMC Public Health*. 2008;8:97  
44  
45
- 46  
47 8. Sharma R,Grover VL,Chaturvedi S. Tobacco Use Among Adolescent Students and the  
48  
49 Influence of Role Models. *Indian J Community Med* 2010;35(2)  
50  
51
- 52  
53 9. Paudel D, Pathak RP. Tobacco Use among Adolescent Students in Secondary Schools of  
54  
55 Pokhara Sub Metropolitan City. *J Nepal Health Res Counc* 2003;1(2)  
56  
57

- 1  
2  
3  
4  
5  
6  
7  
8  
9  
10  
11  
12  
13  
14  
15  
16  
17  
18  
19  
20  
21  
22  
23  
24  
25  
26  
27  
28  
29  
30  
31  
32  
33  
34  
35  
36  
37  
38  
39  
40  
41  
42  
43  
44  
45  
46  
47  
48  
49  
50  
51  
52  
53  
54  
55  
56  
57  
58  
59  
60
10. Kapoor SK, Anand K, Kumar G. Prevalence of Tobacco Use Among School and College Going Adolescents of Haryana. *Indian J Pediatr* 1995;62:461-466
  11. Soteriades ES, Spanoudis G, Talias MA et al. Children's loss of autonomy over smoking: the global youth tobacco survey. *Tob Control* 2011;20:201-206
  12. Aryal UR, Deuba K, Subedi A et al. Prevalence and Determinants of Cigarette Students of Kathmandu Valley. *Asian Journal of Medical Sciences* 2010;1:53-58
  13. Narain R, Sardana S, Gupta S et al. Age at initiation & prevalence of tobacco use among school children in Noida, India: A cross-sectional questionnaire based survey. *Indian J Med Res* 2011;133(3):300-307
  14. Pradeepkumar AS, Mohan S, Gopalakrishnan P et al. Tobacco use in Kerala: findings from three recent studies. *Natl Med J India* 2005;18:148-153
  15. WHO. What about boys: A literature review on the health and development of adolescent boys. Geneva: WHO:2002
  16. Niraula SR. Tobacco Use among Women in Dharan, Eastern Nepal. *J Health Popul Nutr* 2004;22(1):68-74
  17. Population Division Government of Nepal Ministry of Health and Population. Nepal Adolescent and Youth Survey 2010/11 Highlights
  18. Chloe MK, Kiting AS, Lin HS et al. The Youth Tobacco Epidemic in Asia. *East-West Center Working Papers Population Series* 2001;108-117

- 1  
2  
3 19. Central Bureau of Statistics. Population Monograph of Nepal Volume 1 2003. National  
4  
5  
6 Planning Commission. Government of Nepal  
7  
8  
9 20. Subba SH, Binu VS, Menezes RG, Ninan J, Rana MS. Tobacco chewing and associated  
10  
11 factors among youth of Western Nepal: A cross-sectional study. *Indian J Community Med*  
12  
13 2011;36:128-32  
14  
15  
16  
17 21. Al-Sadat N, Misau AY, Zariah Z, Maznah D, Su TT. Adolescent Tobacco Use and Health  
18  
19 in Southeast Asia. *Asia Pac J Public Health* 2010; 22( 3):175S-180S  
20  
21  
22 22. Binu VS, Subba SH, Menezes RG et al. Smoking among Nepali Youth- Prevalence and  
23  
24 Predictors. *Asian Pacific J Cancer Prev* 2010;11: 221-226  
25  
26  
27  
28 23. Choe MK, Thapa S, Podhisita C, Raymundo C, Lin H, Achmad S. The Teen Tobacco  
29  
30 Epidemic in Asia: Indonesia, Nepal, Philippines, Taiwan, and Thailand. *Journal of Youth Studies*  
31  
32 2004; 7(1): 73-87  
33  
34  
35  
36 24. Sreeramareddy CT, Ramakrishnareddy N, Harsha Kumar HN, Sathian B, Arokiasamy JT.  
37  
38 Prevalence, distribution and correlates of tobacco smoking and chewing in Nepal: a secondary  
39  
40 data analysis of Nepal Demographic and Health Survey-2006. *Substance Abuse Treatment,*  
41  
42 *Prevention, and Policy* 2011; 6(33)  
43  
44  
45  
46 25. Park K. Park's Textbook of Preventive and Social Medicine. 21<sup>st</sup> ed. M/s Banarsidas Bhanot  
47  
48 Publishers;2011  
49  
50  
51  
52  
53  
54  
55  
56  
57  
58  
59  
60

**Title:** Tobacco Use and Associated Factors among Adolescent Students in Dharan, Eastern Nepal: A Cross Sectional Questionnaire Survey

**Corresponding Author:**

Dr. Pranil Man Singh Pradhan

Post Graduate Student (Community Medicine and Tropical Diseases)

School of Public Health and Community Medicine

B.P. Koirala Institute of Health Sciences (BPKIHS)

Dharan, Nepal

Phone: 9771025-525555-2626

P.O. Box 7053

Email: pranil.pradhan@gmail.com

**Co authors:**

|    | Co authors' Name         | Designation          | Department                                                            |
|----|--------------------------|----------------------|-----------------------------------------------------------------------|
| 1. | Dr. Paras Kumar Pokharel | Professor and Chief  | School of Public Health and Community Medicine, BPKIHS, Dharan, Nepal |
| 2. | Dr. Surya Raj Niraula    | Additional Professor | School of Public Health and Community Medicine, BPKIHS, Dharan, Nepal |
| 3. | Dr. Anup Ghimire         | Associate Professor  | School of Public Health and Community Medicine, BPKIHS, Dharan, Nepal |
| 4. | Dr. Suman Bahadur Singh  | Associate Professor  | School of Public Health and Community Medicine, BPKIHS, Dharan, Nepal |

**Keywords:** tobacco use, adolescent students, Nepal

**Word Count:** 3525

## Article Summary

### 1. Article focus

- What is the prevalence of tobacco use among the adolescent students of Dharan after the legalization of anti tobacco directives in Nepal?
- What are the factors associated with tobacco use among the students?

### 2. Key messages

- Tobacco use is still prevalent among the adolescent students of Dharan despite the existence of anti-tobacco regulations in the country.
- Tobacco focussed interventions should target vulnerable groups to prevent uptake of the habit and support abstinence among the users taking the factors found significant in this study

### 3. Strengths

- Use of a standard questionnaire enabled our study for comparison with other studies

### 4. Limitations

- Since tobacco use was assessed by self administered questionnaire, chances of bias in responses exist.
- Tobacco use status was not validated by biomarkers in our study.
- Smaller sample size limited our study to school going adolescents only.

- 1
  - 2
  - 3
  - 4
  - 5
  - 6
  - 7
  - 8
  - 9
  - 10
  - 11
  - 12
  - 13
  - 14
  - 15
  - 16
  - 17
  - 18
  - 19
  - 20
  - 21
  - 22
  - 23
  - 24
  - 25
  - 26
  - 27
  - 28
  - 29
  - 30
  - 31
  - 32
  - 33
  - 34
  - 35
  - 36
  - 37
  - 38
  - 39
  - 40
  - 41
  - 42
  - 43
  - 44
  - 45
  - 46
  - 47
  - 48
  - 49
  - 50
  - 51
  - 52
  - 53
  - 54
  - 55
  - 56
  - 57
  - 58
  - 59
  - 60
- The temporal association between the independent variables and tobacco use could not be established due to the study design being cross sectional.

For peer review only

1  
2  
3 **Tobacco Use and Associated Factors among Adolescent Students in Dharan, Eastern**  
4  
5 **Nepal: A Cross Sectional Questionnaire Survey**  
6  
7

8  
9 Pradhan PMS<sup>1</sup>, , Niraula SR<sup>2</sup>, Ghimire A<sup>3</sup>, Singh SB<sup>3</sup>, Pokharel PK<sup>4</sup>  
10

11  
12 (<sup>1</sup>Junior Resident, <sup>2</sup> Additional Professor, <sup>3</sup> Associate Professor, <sup>4</sup> Professor  
13

14 School of Public Health and Community Medicine, BPKIHS)  
15  
16

17  
18 **Abstract**  
19

20  
21 **Introduction:** The tobacco use among the youth, in both smoking and smokeless forms, is quite  
22  
23 high in the South East Asia region. Tobacco use is a major proven risk factor and contributes  
24  
25 substantially to the rising epidemic of non communicable diseases.  
26  
27

28  
29 **Objectives:** To estimate the prevalence of tobacco use and determine associated factors among  
30  
31 adolescent students of Dharan municipality  
32  
33

34  
35 **Design:** Cross sectional study  
36  
37

38  
39 **Setting:** Secondary and higher secondary schools of Dharan municipality in Sunsari district of  
40  
41 Nepal  
42

43  
44 **Participants:** Students in middle (14-15 years) and late adolescence (16-19 years) from grades  
45  
46 9, 10, 11 and 12 were included.  
47  
48

49  
50 **Primary outcome measure:** Ever tobacco use which was defined as one who had not used any  
51  
52 form of tobacco in the past one month but had tried in the past.  
53  
54  
55  
56  
57  
58  
59  
60

1  
2  
3 **Methodology:** Self administered questionnaire adapted from Global Youth Tobacco Survey was  
4 used to assess tobacco use among the representative sample of 1312 adolescent students selected  
5 by stratified random sampling from July 2011 to July 2012.  
6  
7  
8

9  
10  
11 **Results:** Of the total 1454 students, 1312 students completed the questionnaires giving the  
12 response rate of 90.23%. Prevalence of ever use of any tobacco product was 19.7% (95% CI:  
13 17.7-21.6). More than half of the tobacco users (51.9%) preferred to consume tobacco in public  
14 places whereas almost a third (75.6%) of the consumers purchased tobacco from the shops.  
15  
16  
17  
18  
19  
20  
21  
22  
23  
24  
25  
26  
27  
28  
29  
30  
31  
32  
33  
34  
35  
36  
37  
38  
39  
40  
41  
42  
43  
44  
45  
46  
47  
48  
49  
50  
51  
52  
53  
54  
55  
56  
57  
58  
59  
60

Multivariate analysis showed that tobacco use was associated with late adolescence (OR: 1.89; 95% CI: 1.25-2.85), male gender (OR: 11.81; 95% CI: 7.52-18.54), Janajati ethnicity (OR: 2.03; 95% CI: 1.37-3.00) and receiving pocket money  $\geq$ NRs.500 per month (OR: 1.48; 95% CI: 1.06-2.06).

31 **Conclusion:** Tobacco focussed interventions are required for school/college going students in  
32 order to promote cessation among users and prevent initiation, focusing on late adolescence,  
33 male gender, Janajati ethnicity and higher amount of pocket money.  
34  
35  
36  
37  
38  
39  
40  
41  
42  
43  
44  
45  
46  
47  
48  
49  
50  
51  
52  
53  
54  
55  
56  
57  
58  
59  
60



## Introduction

Nearly 70% of the world's smokers live in low and middle income countries. **Nearly two-thirds of the world's smokers live in 10 countries, namely China, India, Indonesia, Russian Federation, the United States, Japan, Brazil, Bangladesh, Germany and Turkey.** [1] Unless a large number of current smokers in **these** countries quit, it is estimated that smoking will be causing 10 million deaths per year worldwide by the 2020s or early 2030s. [2]

The tobacco use among the youth, in both smoking and smokeless forms, is quite high in the South East Asia region **including Nepal. One of the reasons for such high use could be** the creative and targeted marketing strategies of various tobacco companies and its weak regulation. Abundant tobacco production, weak enforcement of tobacco control measures, easy accessibility and affordability of these products are other factors leading to the rise of the epidemic **of tobacco use** in the youth [3]. Although the exact burden of tobacco use among the youth has not been studied extensively in Nepal, a national Global Youth Tobacco Survey (GYTS) in 2007 reported that overall **7.9%** of the students ever smoked cigarettes **and 8% used other tobacco products** [4]. Some of the factors known to be associated with tobacco use among adolescents are age, gender, having smoker friends or parents and the amount of pocket money [5-7].

**The WHO has defined the adolescents as persons in the 10 to 19 years age group. It has also estimated that 70% of premature deaths among adults are due to behavioural patterns that emerge in adolescence including smoking, violence and sexual behaviour. Studies have shown that such risk taking behaviours begin to manifest from the middle adolescence (14-15 years of age) onwards [8]. The present study therefore, focussed on the specific groups of middle (14-15 years) and late adolescents (16-19 years).**

1  
2  
3 The Government of Nepal had signed the Framework Convention on Tobacco Control (FCTC)  
4 on December 3, 2003 followed by its ratification by the House of Representatives on November  
5  
6  
7  
8 7, 2006. In what was regarded as a landmark in the nation's campaign against tobacco, the  
9  
10 government finally assented to the anti-tobacco directives of Tobacco Product Control and  
11  
12 Regulatory Act 2010 on November 4, 2011. This has reflected a strong will from the side of the  
13  
14 government to comply by objectives set out in the convention. A need was felt to **estimate the**  
15  
16 **prevalence of tobacco use** within the Nepalese youth who are the most vulnerable for adoption of  
17  
18 this habit in the background of recent endorsement of anti-tobacco directives by the government.  
19  
20  
21  
22 **The present study was carried out with the objectives to estimate the prevalence of tobacco use**  
23  
24 **and determine associated factors among adolescent students of Dharan municipality of Sunsari**  
25  
26 **district of Nepal.**  
27  
28  
29

## 30 **Methods**

### 31 32 33 **Description of study area**

34  
35  
36 Dharan is a major city in the Sunsari district in Eastern Region of Nepal located at an altitude of  
37  
38 1148 feet. It is situated on the foothills of the Mahabharat Range in the North with the southern  
39  
40 tip touching the edge of the Terai region. Dharan serves as a trading post between the hilly  
41  
42 region and the plains of the Terai. The foundation of modern Dharan was laid in 1902 with the  
43  
44 purpose to supply timber to the then East India Company. This small settlement grew steadily  
45  
46 over time to include diverse people from various ethnicities like Rai, Limbu, Gurung, Newar,  
47  
48 Brahmins, Chhetris and others. Dharan was once home to the British Gurkha Recruitment Center  
49  
50 which was established in 1953. Recruits from all over Nepal flocked to join the British Gurkhas.  
51  
52  
53  
54  
55  
56 Thus the face of Dharan was drastically altered. There was a surge in population with recruits  
57  
58  
59  
60

1  
2  
3 bringing their families and others who came to seek employment and exploit business  
4  
5 opportunities. As a result, Dharan started to emerge as one of the biggest towns in Eastern Nepal.  
6  
7

### 8 9 **Study design**

10  
11 This was a cross sectional study conducted in Dharan Municipality of Sunsari district of Nepal  
12  
13 from July 2011 to July 2012.  
14  
15

### 16 17 **Sample size and sampling method**

18  
19 From a similar study in South Delhi conducted among adolescents of 14-19 years, the overall  
20  
21 prevalence of tobacco use (smoking and smokeless forms) was 20.9% [8]. We calculated the  
22  
23 minimum sample size to estimate the prevalence for 95% confidence limits at an allowable error  
24  
25 of 10% to be 1454 individuals.  
26  
27  
28

29  
30 Students in middle (14-15 years) and late adolescence (16-19 years) from grades 9, 10, 11 and 12  
31  
32 in different schools of Dharan Municipality were included in this study. Current list of schools in  
33  
34 Dharan was obtained from Private and Boarding School's Organization, Nepal (PABSON). From  
35  
36 the list of 87 schools (80 private and 7 government schools), stratified random sampling with  
37  
38 proportionate allocation technique was carried out according to the type of schools. Since the  
39  
40 number of students in grades 9 to 12 in each school was not known, a number of 100 students per  
41  
42 school were assumed. This gave the total assumed population size to be 8700. Based on  
43  
44 population proportionate to size, 1337 students from private and 117 students from government  
45  
46 schools were included in the study sample. We randomly selected 15 private schools and 2  
47  
48 government schools in order to enroll the calculated number of students assuming 100 students  
49  
50  
51  
52  
53  
54  
55  
56  
57  
58  
59  
60

1  
2  
3 from each school. This was followed by random selection of classes from the selected schools.  
4  
5  
6 All the students from the selected classes were included in the study.  
7

### 8 9 **Data collection**

10  
11 Data collection was carried out using a self administered questionnaire adapted from Global  
12 Youth Tobacco Survey. The questionnaire to be used was pretested among the adolescent  
13 students in a different area and necessary corrections and modifications were made in order to  
14 make it more understandable for the students. An elaborative briefing on the questionnaire was  
15 done to all the students of the class prior to data collection.  
16  
17  
18  
19  
20  
21  
22  
23

### 24 25 **Definition of the variables**

26  
27  
28 Ever user: Ever user was defined as one who had not used any form of tobacco (smoked or  
29 chewed) in the past one month but had tried in the past. To assess the ever use participants were  
30 asked, "Prior to the past 30 days, have you ever smoked or chewed tobacco?" Affirmative  
31 response to this question was followed up with questions on type of tobacco used. Ever tobacco  
32 use was considered as the dependent variable [7]. The following explanatory variables were  
33 chosen based on the previous literature: age group [8], gender [5,7], type of school [6,9], grade  
34 [6], religion [7], ethnicity [9], type of family [8], parental occupation [13], pocket money [5-7]  
35 and parental tobacco use [5,7]. Type of school was categorized into private and government as  
36 more number of smokers was reported in private than government school [9]. Ethnic groups  
37 were broadly classified into Brahmin/Chhetri, Janajati, Dalit and Terai Major Caste as each  
38 ethnic group is a collection of many castes which have common customs, socio-economic,  
39 cultural and traditional values. Type of family was divided into nuclear and joint. The family  
40  
41  
42  
43  
44  
45  
46  
47  
48  
49  
50  
51  
52  
53  
54  
55  
56  
57  
58  
59  
60

1  
2  
3 with a married couple and their dependent children was nuclear whereas family with a number of  
4 married couples and their children living together in the same household was considered joint  
5 [25]. Grade was incorporated because transition from secondary to higher secondary level  
6 education (Grade 11 and 12) is a major challenge and stress to all students in context of current  
7 education system of Nepal. We used parental occupation as one of the explanatory variables  
8 since it was not possible to assess valid socioeconomic status of the family from the students.  
9  
10 The pocket money was dichotomized based on the median amount received per month as there  
11 was a wide variation in the amounts and data was not normally distributed.  
12  
13  
14  
15  
16  
17  
18  
19  
20  
21  
22

### 23 **Data analysis**

24  
25  
26 Collected data were entered into MS Windows Excel in the form of codes. Analysis was  
27 performed using Statistical Package for Social Sciences (SPSS) 17 version. In bivariate analysis  
28 with categorical variables, Chi-Square test was applied. Binary logistic regression analysis with  
29 backward elimination was used to determine the independence of associations observed in  
30 bivariate analysis by controlling for potential confounding factors. Goodness of fit of the model  
31 was tested by Hosmer and Lemeshow test. Probability of significance was set at 5%. Mann  
32  
33  
34  
35  
36  
37  
38  
39  
40  
41  
42  
43  
44  
45  
46  
47  
48  
49  
50  
51  
52  
53  
54  
55  
56  
57  
58  
59  
60

### 50 **Ethical clearance**

51  
52  
53  
54  
55  
56  
57  
58  
59  
60

Ethical clearance was acquired from the ethical committee of B.P. Koirala Institute of Health Sciences at the start of the study. Informed consent was taken from all the participants. We

1  
2  
3 obtained written permission from the school authorities before interaction with the students. All  
4  
5 the students present at the time of the visit were included in the study. Participation in the study  
6  
7 was entirely voluntary and full confidentiality of the responses was maintained after clear  
8  
9 explanation of the objectives of the study. Absence of any school personnel or teacher at the time  
10  
11 of data collection was ensured in order to prevent response bias.  
12  
13

## 14 15 16 **Results**

17  
18  
19 **Of** the total sample **of 1454**, 1312 students completed the questionnaires giving the response rate  
20  
21 of 90.23%. Among the remaining questionnaires, eighty were incomplete whereas sixty two did  
22  
23 not match the age criteria therefore were excluded from the data analyses.  
24  
25

### 26 27 *Socio-demographic characteristics*

28  
29  
30 Among the participants, **median age was 16 years (Inter-quartile range 15-17 years)**. Proportion  
31  
32 of students in the age group of middle adolescence (14-15 years) and late adolescence (16-19  
33  
34 years) were almost equal. **Age showed positive correlation with grade (Pearson correlation**  
35  
36 **coefficient=0.756, p<0.001)**. Participation was almost equal from both the gender (Male:  
37  
38 Female=1.1:1). Participants who were Janajati by ethnicity were predominant. Other religions  
39  
40 comprised of Chritianity, Muslim, Jainism, Sahajyog and Heavenly path or Premwaad (Lovism).  
41  
42

43  
44 (Table 1)  
45  
46  
47  
48  
49  
50  
51  
52  
53  
54  
55  
56  
57  
58  
59  
60

Table 1: Socio-demographic characteristics of the adolescent students in Dharan, Sunsari

(N=1312)

| Characteristics          | Number      | Percentage  |
|--------------------------|-------------|-------------|
| <b>Age Group (years)</b> |             |             |
| 14-15                    | 648         | 49.4        |
| 16-19                    | 664         | 50.6        |
| <b>Gender</b>            |             |             |
| Male                     | 694         | 52.9        |
| Female                   | 618         | 47.1        |
| <b>School</b>            |             |             |
| <b>Private</b>           | <b>1176</b> | <b>89.6</b> |
| <b>Government</b>        | <b>136</b>  | <b>10.4</b> |
| <b>Education Level</b>   |             |             |
| 9                        | 551         | 42          |
| 10                       | 422         | 32.2        |
| 11                       | 174         | 13.3        |
| 12                       | 165         | 12.6        |
| <b>Caste/Ethnicity*</b>  |             |             |
| Janajati                 | 816         | 62.2        |
| Brahmin/Chhetri          | 335         | 25.5        |
| Terai Major Caste        | 83          | 6.3         |
| Dalit                    | 78          | 5.9         |

**Religion**

|                       |            |            |
|-----------------------|------------|------------|
| Hindu                 | 1038       | 79.1       |
| <b>Buddhist/Kirat</b> | <b>126</b> | <b>9.6</b> |
| <b>Kirat</b>          | <b>80</b>  | <b>6.1</b> |
| Others                | 68         | 5.2        |

**\*Janajati: Rai, Limbu, Magar, Newar; Brahmin/Chhetri: Baral, Neupane, Oli, Paudel Terai Major Caste: Agrawal, Das, Jha, Roy, Sah, Yadav; Dalit: Bafna, Kuki, Mardi, Tamli etc. [19]**

Of the respondents' fathers who were alive, majority (34.2%) were involved in business. Almost four-fifths (80.5%) of the respondent's mothers who were alive were housewives and farmers.

*Prevalence of ever tobacco use*

The prevalence of **ever tobacco use** was 19.7% (95% CI: 17.7-21.6) in our study. The prevalence among males and females was 33.6% (95% CI: 30.2-36.9) and 4.0% (95% CI: 2.6-5.3) respectively. Among the ever smokers, 98.7% (232/235) were smoking cigarettes whereas 1.3% (3/235) were smoking hukka or cigar. Median number of sticks smoked per day was 2 (IQR 1-3). Among the ever chewers of tobacco, 34.28% (36/105) were found to be consuming Gutkha (a mixture of crushed areca nut, tobacco, catechu, paraffin, lime and sweet or savory flavorings), 26.66% (28/105) Paan masala (a balanced mixture of betel leaf with lime, areca nut, clove, cardamom, mint, tobacco, essence and other ingredients), 7.61% (8/105) Surti (dried tobacco leaves for chewing), 21.90% (23/105) Khaini (mixture of sun-dried tobacco and slaked lime) and 9.52% (10/105) Zarda (small pieces of tobacco leaves with slaked lime and spices boiled and dried).



1  
2  
3 The median age of initiating tobacco smoking and chewing was 14 years (IQR= 13-15). The  
4  
5 mean age of initiating tobacco smoking was 13.79 years (SD = 2.21) whereas that of initiating  
6  
7 tobacco chewing was 13.58 years (SD = 2.11). More than half of the users (51.9%) preferred to  
8  
9 consume tobacco in public places followed by friend's house (14%). Almost a third (75.6%) of  
10  
11 the users purchased tobacco directly from the shops. Majority of the students started using  
12  
13 tobacco out of curiosity (41.1%) followed by to relieve tension (26.7%) and peer pressure  
14  
15 (25.5%).  
16  
17  
18  
19

#### 20 21 *Pocket money and expenditure on tobacco*

22  
23  
24 This study found the median expenditure on tobacco to be Nepalese Rupees (NRs). 100 per  
25  
26 month (Inter-quartile range 30-200) (NRs. 3.33 or 0.037 United States Dollar per day), which  
27  
28 was one fifth of their pocket money (Median 500, Inter-quartile range 300-1000). **Median pocket**  
29  
30 **money (NRs.) received per month by the ever users (Median=500, IQR=300-1000) was**  
31  
32 **significantly different than the non users (Median= 500, IQR=247.50-600) (p<0.001).**  
33  
34  
35

#### 36 37 *Bi-variate analysis*

38  
39  
40 In the bivariate analysis, students in the late adolescence were more likely to ever use tobacco  
41  
42 than those in middle adolescence (OR= 2.24; 95% CI: 1.67-3.01). Males were more likely to  
43  
44 ever use tobacco than females (OR= 11.98; 95% CI: 7.79-18.43). Students in grade 10 had more  
45  
46 than two times the odds of ever using tobacco than those in grade 9 (OR= 2.17; 95% CI: 1.56-  
47  
48 3.02). Compared to Brahmins/Chhetris, students belonging to Janajati ethnicity were more likely  
49  
50 to ever use tobacco (OR=1.76; 95% CI: 1.23-2.52). Students from nuclear families were less  
51  
52 likely to ever use tobacco than those from joint families (OR=0.75; 95% CI: 0.56-1.00). Students  
53  
54  
55  
56  
57  
58  
59  
60

whose fathers were working abroad in skilled or semi skilled work were more likely to ever use tobacco than those whose fathers were in service or professionals (OR=1.69; 95% CI:1.13-2.52). Students who received pocket money of more than or equal to NRs. 500 per month were more likely to ever use tobacco than those who received less (OR=1.44; 95% CI: 1.08-1.92). (Table 2)

**Table 2: Different characteristics of participants and tobacco use: Bi-variate analysis**

| Characteristics          | Ever User<br>N(%) | Non User<br>N(%) | p value | Crude OR<br>(95% CI) |
|--------------------------|-------------------|------------------|---------|----------------------|
| <b>Age Group (years)</b> |                   |                  |         |                      |
| 14-15                    | 87 (13.4)         | 561 (86.6)       | <0.001  | 1                    |
| 16-19                    | 171 (25.8)        | 493 (74.2)       |         | 2.24 (1.67-3.01)     |
| <b>Gender</b>            |                   |                  |         |                      |
| Female                   | 25 (4.0)          | 593 (96.0)       | <0.001  | 1                    |
| Male                     | 233 (33.6)        | 461 (66.4)       |         | 11.98 (7.79-18.43)   |
| <b>Type of School</b>    |                   |                  |         |                      |
| Private                  | 230 (19.6)        | 946 (80.4)       | 0.775   | 1                    |
| Government               | 28 (20.6)         | 108 (79.4)       |         | 1.07 (0.67-1.69)     |
| <b>Grade</b>             |                   |                  |         |                      |
| 9                        | 82 (14.9)         | 469 (85.1)       | <0.001  | 1                    |
| 10                       | 116 (27.5)        | 306 (72.5)       |         | 2.17 (1.56-3.02)     |
| 11                       | 29 (16.7)         | 145 (83.3)       |         | 1.14 (0.70-1.86)     |

|                                     |            |            |        |                  |
|-------------------------------------|------------|------------|--------|------------------|
| 12                                  | 31 (18.8)  | 134 (81.2) |        | 1.32 (0.82-2.13) |
| <b>Religion</b>                     |            |            |        |                  |
| Hindu                               | 196 (18.9) | 842 (81.1) | 0.572  | 1                |
| Buddhist                            | 31 (24.6)  | 95 (74.4)  |        | 1.40 (0.89-2.21) |
| Kirat                               | 21 (26.3)  | 59 (73.8)  |        | 1.53 (0.88-2.65) |
| Others                              | 10 (14.7)  | 58 (85.3)  |        | 0.74 (0.35-1.53) |
| <b>Caste/Ethnicity</b>              |            |            |        |                  |
| Brahmin / Chhetri                   | 49 (14.6)  | 286 (85.4) | <0.001 | 1                |
| Janajati                            | 189 (23.2) | 627 (76.8) |        | 1.76 (1.23-2.52) |
| Dalit                               | 14 (17.9)  | 64 (82.1)  |        | 1.28 (0.63-2.56) |
| Terai Major Caste                   | 6 (7.2)    | 77 (92.8)  |        | 0.45 (0.17-1.16) |
| <b>Type of Family</b>               |            |            |        |                  |
| Joint                               | 97 (22.9)  | 327 (77.1) | 0.043  | 1                |
| Nuclear                             | 161 (18.1) | 727 (81.9) |        | 0.75 (0.56-1.00) |
| <b>Father's Occupation (n=1269)</b> |            |            |        |                  |
| Service/Professional                | 49 (16.6)  | 247 (83.4) | 0.002  | 1                |
| Rtd.Army/Unemployed                 | 16 (27.1)  | 43 (72.9)  |        | 1.88 (0.93-3.76) |
| Farmer                              | 23 (24.7)  | 70 (75.3)  |        | 1.66 (0.91-3.01) |
| Business                            | 67 (15.4)  | 367 (84.6) |        | 0.92 (0.60-1.40) |
| Foreign/Skilled/Semi Skilled        | 97 (25.1)  | 290 (74.9) |        | 1.69 (1.13-2.52) |
| <b>Mother's Occupation (n=1295)</b> |            |            |        |                  |
| Service/Professional                | 36 (21.1)  | 135 (78.9) | 0.983  | 1                |
| Foreign/Skilled/Semi Skilled        | 20 (24.4)  | 62 (75.6)  |        | 1.21 (0.62-2.36) |

1  
2  
3  
4  
5  
6  
7  
8  
9  
10  
11  
12  
13  
14  
15  
16  
17  
18  
19  
20  
21  
22  
23  
24  
25  
26  
27  
28  
29  
30  
31  
32  
33  
34  
35  
36  
37  
38  
39  
40  
41  
42  
43  
44  
45  
46  
47  
48  
49  
50  
51  
52  
53  
54  
55  
56  
57  
58  
59  
60

|                                  |            |            |              |                  |
|----------------------------------|------------|------------|--------------|------------------|
| Housewife/Farmer                 | 195 (18.7) | 847 (81.3) |              | 0.86 (0.57-1.31) |
| <b>Pocket Money/month (NRs.)</b> |            |            |              |                  |
| <500                             | 102 (16.6) | 511 (83.4) | <b>0.010</b> | 1                |
| ≥500                             | 156 (22.3) | 543 (77.7) |              | 1.44 (1.08-1.92) |
| <b>Parental tobacco use</b>      |            |            |              |                  |
| Absent                           | 139 (19.4) | 579 (80.6) | 0.760        | 1                |
| Present                          | 119 (20.0) | 475 (80.0) |              | 1.04 (0.79-1.38) |

### *Multivariate analysis*

After multivariate analysis, students in late adolescence (16-19 years) were more likely to be ever tobacco users compared to middle adolescence (14-15 years) (OR= 1.89; 95% CI: 1.25-2.85). Male were more likely to ever use tobacco compared to females (OR= 11.81; 95% CI: 7.52-18.54). The students in grade 10 were more likely to ever use tobacco than grade 9 (OR=1.51; 95% CI: 1.00-2.28) whereas those in grade 11 were less likely to ever use tobacco than grade 9 (OR=0.50; 95% CI: 0.27-0.93). Students from Janajati ethnicity were more than two times likely to be ever users of tobacco than those who were Brahmin/Chhetris (OR=2.03, CI=1.37-3.00). The adolescents who received pocket money of more than or equal to NRs.500 per month had higher odds of ever using tobacco compared to those who received less (OR= 1.48, CI= 1.06, 2.06). (Table 3)

**Table 3: Association of different variables with tobacco use among adolescent students:**  
**multivariate analysis (N=1312)**

| <b>Characteristics</b>   | <b>Adjusted Odds Ratio (95% CI)</b> |
|--------------------------|-------------------------------------|
| <b>Age Group (years)</b> |                                     |
| 14-15                    | 1.00                                |
| 16-19                    | <b>1.89 (1.25, 2.85)</b>            |
| <b>Gender</b>            |                                     |
| Female                   | 1.00                                |
| Male                     | <b>11.81 (7.52, 18.54)</b>          |
| <b>Grade</b>             |                                     |
| 9                        | 1.00                                |
| 10                       | 1.51 (1.00, 2.28)                   |
| 11                       | <b>0.50 (0.27, 0.93)</b>            |
| 12                       | 0.69 (0.37, 1.29)                   |
| <b>Caste/Ethnicity</b>   |                                     |
| Brahmin/Chhetri          | 1.00                                |
| Janajati                 | <b>2.03 (1.37, 3.00)</b>            |
| Dalit                    | 1.76 (0.85, 3.65)                   |
| Terai Major Caste        | 0.47 (0.18, 1.21)                   |
| <b>Type of Family</b>    |                                     |
| Joint                    | 1.00                                |
| Nuclear                  | 0.73 (0.52, 1.02)                   |

**Pocket Money per month**

|      |                          |
|------|--------------------------|
| <500 | 1.00                     |
| ≥500 | <b>1.48 (1.06, 2.06)</b> |

---

*-2 Log likelihood=1001.860, Chi-square=11.015, df=8, p=0.201*

**Discussion**

National GYTS in Nepal in 2007 was conducted among students from 13-15 years age group only whereas our study included students from 14-19 years. Almost equal proportion of male (52.9%) and female (47.1%) students were involved in our study. Participants belonging to Janajati ethnicity were predominant in this study. Similar study from Pokhara, Nepal reported nearly equal proportion of males and females with predominance of Brahmin ethnicity [9].

The prevalence of ever use of tobacco in this study was more compared to a study from western Nepal [7]. Prevalence of ever smokers of tobacco (17.9%) was high compared to National GYTS where 7.9% of students had ever smoked [4]. Regarding tobacco chewing, prevalence in our study (8.0%) was low compared to similar study among college students from western Nepal (21.2%) [20]. Inclusion of students from secondary and higher secondary level in our study could have attributed to this difference in prevalence.

The mean age for tobacco use initiation (smoking and chewing) in our study was found to be in consistency with studies from Kathmandu, Noida, and Kerala, India where the mean ages of onset were 14.15, 12.4 and 13.2 years respectively [12-14]. Early and middle adolescence is more vulnerable for initiation of tobacco use hence; a target group is highlighted for early intervention to reduce the uptake of this habit.

1  
2  
3 Our study has shown that more than half of the adolescent tobacco users prefer public places as  
4 their most common location of tobacco use and shops as the most common source. Similar  
5 results have been obtained in the study from Pokhara, Nepal which showed that most of the  
6 respondents (66.7%) smoked in public places like tea stalls or restaurants and majority purchased  
7 it from the shops [7]. National GYTS in 2007 reported that more than two-third (69.5%) of the  
8 students were not refused tobacco purchase in stores because of their age [4]. According to a  
9 study from Kerala, India, the most preferred places for smoking were friends' house and public  
10 places [6]. Provision of unrestricted access to tobacco products in the shops especially to the  
11 adolescents including minors, and its open use in public places pose a great challenge to the  
12 implementation of the regulations of the anti tobacco law in Nepal.  
13  
14  
15  
16  
17  
18  
19  
20  
21  
22  
23  
24  
25  
26  
27

28 Curiosity, relieving tension and pressure from friends were the major reasons behind initiating  
29 tobacco use in this study. In developing countries, documented factors implicated in the initiation  
30 of tobacco use among youth include experimentation, peer pressure and feeling more matured  
31 [21].  
32  
33  
34  
35  
36  
37

38 We found that students in late adolescence were nearly two times more likely to consume  
39 tobacco compared to those in middle adolescence. Similar result was seen in a study from Kerala  
40 where students aged 16 years and above were nearly three times more likely to be tobacco users  
41 compared to those who were 13 years old (Adjusted OR=2.9, CI=1.6-5.3) [6]. Tobacco use is  
42 more common in later adolescence thus cessation attempts need to be focused in these groups.  
43  
44  
45  
46  
47  
48  
49

50 Type of family can influence tobacco use. Ever use of tobacco was two times more likely in  
51 students belonging to nuclear families compared to joint families (Adjusted OR=1.96, 95% CI:  
52 1.11-3.45) in a study from India [8]. In our study tobacco use was less likely among students  
53  
54  
55  
56  
57  
58  
59  
60

1  
2  
3 belonging to nuclear families. Close contact among parents and children in nuclear families  
4  
5 might play a protective role in taking up risky behavior like tobacco use.  
6  
7

8  
9 In context of Nepal, transition from secondary to higher secondary level education (Grade 11 and  
10  
11 12) is a major stress factor. Taking this into account, we took grade as a separate entity although  
12  
13 it was significantly correlated with age. Likelihood of ever using tobacco was less in grades 11  
14  
15 and 12 than lower grades in our study. The start of higher secondary level education presents  
16  
17 new peer groups and different environment which could have influenced the tobacco use among  
18  
19 the students.  
20  
21

22  
23  
24 Prevalence of ever tobacco use was more than eight times in the boys as compared to girls in our  
25  
26 study. Similar difference of prevalence between males and females was seen in other studies  
27  
28 conducted in Nepal and abroad [8-11]. Males were more likely to ever smoke than females in a  
29  
30 study from western Nepal (Adjusted OR=4.0; 95% CI=2.9-5.6) [22] and Haryana, India  
31  
32 (Adjusted OR= 4.67; 95% CI=1.91-11.4) [10]. Tobacco use can be considered as part of a  
33  
34 constellation of risk-taking behaviors that is more prevalent in the males [15]. In context of  
35  
36 Nepal, teen smoking is viewed as an acceptable behavior for boys but not for girls, especially  
37  
38 among the unmarried. Large proportions of teens in Asian countries, especially boys, pick up  
39  
40 smoking as a part of normal behavior associated with their transition to adulthood [23]. This  
41  
42 striking gender differences in tobacco use was also observed among Nepalese population aged  
43  
44 15 to 59 years [24]. However, the rising trend of tobacco use among the girls should not be  
45  
46 ignored. It has been mentioned that when the prevalence of smoking among teen girls increases  
47  
48 in Asian countries, it seems to increase first in metropolitan areas. Continuing modernization is  
49  
50 likely to narrow the gender differences in smoking and is likely to result in high prevalence of  
51  
52  
53  
54  
55  
56  
57  
58  
59  
60



1  
2  
3 smoking among teen girls in Asian countries [23]. Dharan, a town on the verge of rapid  
4  
5 urbanization is likely to face this scenario in the near future.  
6  
7

8  
9 Jajajatis were two times more likely to consume tobacco compared to Brahmins/Chhetris in our  
10  
11 study. Janajatis is the broad ethnic group comprising castes mainly from the hills of Nepal.  
12

13  
14 Tobacco chewing was significantly more among the hill native castes which included Rai,  
15  
16 Limbu, Magar, Tamang, Gurung whereas smoking was significantly higher among the hill  
17  
18 occupational castes which included Biswakarma, Pariyar and Sarki in a study conducted among  
19  
20 females population of Dharan [16]. Nepal Adolescent and Youth Survey (NAYS) in 2010  
21  
22 showed similar results in which relatively advantaged Janajatis had higher prevalence of liquor  
23  
24 (32.60%) and tobacco use (16.62%) followed by disadvantaged Janajatis (27.83% and 13.71%  
25  
26 respectively) [17]. The population of hill region is more diverse than the Terai region in its  
27  
28 ethnic, caste, and religious composition and the attitude towards smoking is more permissive  
29  
30 among the people from the hills [18]. This might be a possible explanation for the higher  
31  
32 prevalence of tobacco use seen among the Janajatis in various studies across Nepal including  
33  
34 ours.  
35  
36  
37  
38  
39

40  
41 Greater likelihood of using tobacco with higher amount of pocket money was reflected in other  
42  
43 studies as well [5,6]. Having some amount of disposable money at hand might predispose the  
44  
45 adolescents towards use of tobacco by easing the access. However, asking for more pocket  
46  
47 money to buy tobacco products could be the reason behind the significance of the association for  
48  
49 which further studies are required.  
50

51  
52  
53 Our study had few limitations. Even though the participation in the study was entirely voluntary  
54  
55 with an assurance of non disclosure of identity and confidentiality, chances of bias may occur in  
56  
57

1  
2  
3 the findings as the data was collected through self administered questionnaire. The assessment of  
4 the tobacco use status was based entirely upon the response given by the subject believing that  
5 false reporting was very unlikely. However this was not validated by biomarkers. Sample size of  
6 the study was small and limited to school going adolescents only. The temporal association  
7 between the independent variables and tobacco use could not be established due to the study  
8 design being cross sectional.  
9  
10  
11  
12  
13  
14  
15  
16

### 17 18 **Conclusion**

19  
20 The study revealed tobacco use is prevalent among the adolescent students despite the existence  
21 of anti-tobacco regulations in the country. Late adolescence, male gender, Janajati ethnicity and  
22 higher pocket money were significantly associated with tobacco use. Taking these factors into  
23 consideration, tobacco focussed interventions should target vulnerable groups to prevent uptake  
24 of the habit and support abstinence among the users. Further researches are needed to explore the  
25 vulnerability of certain ethnic groups towards tobacco use to generate an effective awareness  
26 campaign.  
27  
28  
29  
30  
31  
32  
33  
34  
35  
36  
37  
38

### 39 **Competing Interests**

40  
41 The author(s) declare that they have no competing interests.  
42  
43  
44

### 45 **Acknowledgement**

46  
47 Our sincere appreciation goes to all the students who agreed to participate in this study and the  
48 respected principals of the schools who allowed us to conduct this study by lending their  
49 valuable time.  
50  
51  
52  
53  
54  
55  
56  
57  
58  
59  
60

### Contributorship statement

Dr. Prnil Man Singh Pradhan was involved in designing the protocol, collection, entering and analysis of data and preparation of the final document. Prof. Paras Kumar Pokharel was responsible for the overall review of the protocol and final report and provided critical analysis where needed. Dr. Surya Raj Niraula assisted in data entry and analysis and concentrated on presentation of the results. Dr. Anup Ghimire and Dr. Suman Bahadur Singh were involved in the critical review of the final report and provided necessary feedback.

### What this paper adds

This study highlights upon the **prevalence** of tobacco use that still exists among the adolescent students **after** the endorsement of anti tobacco law in Nepal in 2011.

Ethnicity was significantly associated with tobacco use as adolescent students belonging to Janajati ethnicity had greater likelihood of using tobacco products compared to Brahmins/Chhetris.

### Data sharing statement

Extra data is available by emailing Dr. Prnil Man Singh Pradhan (prnil.pradhan@gmail.com)

### References

1. Detels R, Beaglehole R, Lansang MA et al. Oxford Textbook of Public Health. Oxford University Press 2009

- 1  
2  
3 2. Warren CW, Jones NR, Eriksen MP et al for the Global Tobacco Surveillance System (GTSS)  
4  
5 collaborative group. Patterns of global tobacco use in young people and implications for future  
6  
7 chronic disease burden in adults. *Lancet* 2006;367:749-753  
8  
9
- 10  
11 3. WHO. Office for South-East Asia (SEARO). Profile on Implementation of WHO Framework  
12  
13 Convention on Tobacco Control in the South-East Asia Region. New Delhi, India.2011  
14  
15
- 16  
17 4. Pandey MR, Pathak RP, Shrestha S et al. National Global Youth Tobacco Survey (GYTS) and  
18  
19 National Global School Personnel Survey (GSPS) in Nepal 2007  
20  
21
- 22  
23 5. Rachiotis G, Muula AS, Rudatsikira E et al. Factors associated with adolescent cigarette  
24  
25 smoking in Greece: Results from a cross sectional study (GYTS Study). *BMC Public Health*  
26  
27 2008;8:313  
28  
29
- 30  
31 6. Mohan S, Sarma PS, Thankappan KR. Access to Pocket money and low educational  
32  
33 performance predict tobacco use among adolescent boys in Kerala, India. *Preventive Medicine*  
34  
35 2005;41:685-692  
36  
37
- 38  
39 7. Sreeramareddy CT, Kishore P, Paudel J, Menezes RG. Prevalence and correlates of tobacco  
40  
41 use amongst junior collegiate in twin cities of western Nepal: A cross-sectional, questionnaire-  
42  
43 based survey. *BMC Public Health*. 2008;8:97  
44  
45
- 46  
47 8. Sharma R,Grover VL,Chaturvedi S. Tobacco Use Among Adolescent Students and the  
48  
49 Influence of Role Models. *Indian J Community Med* 2010;35(2)  
50  
51
- 52  
53 9. Paudel D, Pathak RP. Tobacco Use among Adolescent Students in Secondary Schools of  
54  
55 Pokhara Sub Metropolitan City. *J Nepal Health Res Counc* 2003;1(2)  
56  
57

- 1  
2  
3 10. Kapoor SK, Anand K, Kumar G. Prevalence of Tobacco Use Among School and College  
4  
5  
6  
7  
8  
9  
10  
11  
12  
13  
14  
15  
16  
17  
18  
19  
20  
21  
22  
23  
24  
25  
26  
27  
28  
29  
30  
31  
32  
33  
34  
35  
36  
37  
38  
39  
40  
41  
42  
43  
44  
45  
46  
47  
48  
49  
50  
51  
52  
53  
54  
55  
56  
57  
58  
59  
60
10. Kapoor SK, Anand K, Kumar G. Prevalence of Tobacco Use Among School and College  
Going Adolescents of Haryana. *Indian J Pediatr* 1995;62:461-466
11. Soteriades ES, Spanoudis G, Talias MA et al. Children's loss of autonomy over smoking: the  
global youth tobacco survey. *Tob Control* 2011;20:201-206
12. Aryal UR, Deuba K, Subedi A et al. Prevalence and Determinants of Cigarette Students of  
Kathmandu Valley. *Asian Journal of Medical Sciences* 2010;1:53-58
13. Narain R, Sardana S, Gupta S et al. Age at initiation & prevalence of tobacco use among  
school children in Noida, India: A cross-sectional questionnaire based survey. *Indian J Med Res*  
2011;133(3):300-307
14. Pradeepkumar AS, Mohan S, Gopalakrishnan P et al. Tobacco use in Kerala: findings from  
three recent studies. *Natl Med J India* 2005;18:148-153
15. WHO. What about boys: A literature review on the health and development of adolescent  
boys. Geneva: WHO:2002
16. Niraula SR. Tobacco Use among Women in Dharan, Eastern Nepal. *J Health Popul Nutr*  
2004;22(1):68-74
17. Population Division Government of Nepal Ministry of Health and Population. Nepal  
Adolescent and Youth Survey 2010/11 Highlights
18. Chloe MK, Kiting AS, Lin HS et al. The Youth Tobacco Epidemic in Asia. *East-West Center  
Working Papers Population Series* 2001;108-117

- 1  
2  
3  
4  
5  
6  
7  
8  
9  
10  
11  
12  
13  
14  
15  
16  
17  
18  
19  
20  
21  
22  
23  
24  
25  
26  
27  
28  
29  
30  
31  
32  
33  
34  
35  
36  
37  
38  
39  
40  
41  
42  
43  
44  
45  
46  
47  
48  
49  
50  
51  
52  
53  
54  
55  
56  
57  
58  
59  
60
19. Central Bureau of Statistics. Population Monograph of Nepal Volume 1 2003. National Planning Commission. Government of Nepal
20. Subba SH, Binu VS, Menezes RG, Ninan J, Rana MS. Tobacco chewing and associated factors among youth of Western Nepal: A cross-sectional study. *Indian J Community Med* 2011;36:128-32
21. Al-Sadat N, Misau AY, Zariah Z, Maznah D, Su TT. Adolescent Tobacco Use and Health in Southeast Asia. *Asia Pac J Public Health* 2010; 22( 3):175S-180S
22. Binu VS, Subba SH, Menezes RG et al. Smoking among Nepali Youth- Prevalence and Predictors. *Asian Pacific J Cancer Prev* 2010;11: 221-226
23. Choe MK, Thapa S, Podhisita C, Raymundo C, Lin H, Achmad S. The Teen Tobacco Epidemic in Asia: Indonesia, Nepal, Philippines, Taiwan, and Thailand. *Journal of Youth Studies* 2004; 7(1): 73-87
24. Sreeramareddy CT, Ramakrishnareddy N, Harsha Kumar HN, Sathian B, Arokiasamy JT. Prevalence, distribution and correlates of tobacco smoking and chewing in Nepal: a secondary data analysis of Nepal Demographic and Health Survey-2006. *Substance Abuse Treatment, Prevention, and Policy* 2011; 6(33)
25. Park K. Park's Textbook of Preventive and Social Medicine. 21<sup>st</sup> ed. M/s Banarsidas Bhanot Publishers;2011

**STROBE 2007 (v4) checklist of items to be included in reports of observational studies in epidemiology\***  
**Checklist for cohort, case-control, and cross-sectional studies (combined)**

| Section/Topic             | Item # | Recommendation                                                                                                                                                                                                                                                                                                                                                                                                                                                         | Reported on page # |
|---------------------------|--------|------------------------------------------------------------------------------------------------------------------------------------------------------------------------------------------------------------------------------------------------------------------------------------------------------------------------------------------------------------------------------------------------------------------------------------------------------------------------|--------------------|
| Title and abstract        | 1      | (a) Indicate the study’s design with a commonly used term in the title or the abstract                                                                                                                                                                                                                                                                                                                                                                                 | 4                  |
|                           |        | (b) Provide in the abstract an informative and balanced summary of what was done and what was found                                                                                                                                                                                                                                                                                                                                                                    | 4-5                |
| <b>Introduction</b>       |        |                                                                                                                                                                                                                                                                                                                                                                                                                                                                        |                    |
| Background/rationale      | 2      | Explain the scientific background and rationale for the investigation being reported                                                                                                                                                                                                                                                                                                                                                                                   | 5                  |
| Objectives                | 3      | State specific objectives, including any pre-specified hypotheses                                                                                                                                                                                                                                                                                                                                                                                                      | 6                  |
| <b>Methods</b>            |        |                                                                                                                                                                                                                                                                                                                                                                                                                                                                        |                    |
| Study design              | 4      | Present key elements of study design early in the paper                                                                                                                                                                                                                                                                                                                                                                                                                | 6                  |
| Setting                   | 5      | Describe the setting, locations, and relevant dates, including periods of recruitment, exposure, follow-up, and data collection                                                                                                                                                                                                                                                                                                                                        | 7-8                |
| Participants              | 6      | (a) <i>Cohort study</i> —Give the eligibility criteria, and the sources and methods of selection of participants. Describe methods of follow-up<br><i>Case-control study</i> —Give the eligibility criteria, and the sources and methods of case ascertainment and control selection. Give the rationale for the choice of cases and controls<br><i>Cross-sectional study</i> —Give the eligibility criteria, and the sources and methods of selection of participants | 8                  |
|                           |        | (b) <i>Cohort study</i> —For matched studies, give matching criteria and number of exposed and unexposed<br><i>Case-control study</i> —For matched studies, give matching criteria and the number of controls per case                                                                                                                                                                                                                                                 |                    |
| Variables                 | 7      | Clearly define all outcomes, exposures, predictors, potential confounders, and effect modifiers. Give diagnostic criteria, if applicable                                                                                                                                                                                                                                                                                                                               | 9-10               |
| Data sources/ measurement | 8*     | For each variable of interest, give sources of data and details of methods of assessment (measurement). Describe comparability of assessment methods if there is more than one group                                                                                                                                                                                                                                                                                   | 9                  |
| Bias                      | 9      | Describe any efforts to address potential sources of bias                                                                                                                                                                                                                                                                                                                                                                                                              | 10-11              |
| Study size                | 10     | Explain how the study size was arrived at                                                                                                                                                                                                                                                                                                                                                                                                                              | 8-9                |
| Quantitative variables    | 11     | Explain how quantitative variables were handled in the analyses. If applicable, describe which groupings were chosen and why                                                                                                                                                                                                                                                                                                                                           | 10                 |
| Statistical methods       | 12     | (a) Describe all statistical methods, including those used to control for confounding                                                                                                                                                                                                                                                                                                                                                                                  | 10                 |
|                           |        | (b) Describe any methods used to examine subgroups and interactions                                                                                                                                                                                                                                                                                                                                                                                                    | 10                 |
|                           |        | (c) Explain how missing data were addressed                                                                                                                                                                                                                                                                                                                                                                                                                            | 10                 |
|                           |        | (d) <i>Cohort study</i> —If applicable, explain how loss to follow-up was addressed<br><i>Case-control study</i> —If applicable, explain how matching of cases and controls was addressed                                                                                                                                                                                                                                                                              |                    |

|                          |     |                                                                                                                                                                                                              |         |
|--------------------------|-----|--------------------------------------------------------------------------------------------------------------------------------------------------------------------------------------------------------------|---------|
|                          |     | <i>Cross-sectional study</i> —If applicable, describe analytical methods taking account of sampling strategy                                                                                                 |         |
|                          |     | (e) Describe any sensitivity analyses                                                                                                                                                                        |         |
| <b>Results</b>           |     |                                                                                                                                                                                                              |         |
| Participants             | 13* | (a) Report numbers of individuals at each stage of study—eg numbers potentially eligible, examined for eligibility, confirmed eligible, included in the study, completing follow-up, and analysed            | 11      |
|                          |     | (b) Give reasons for non-participation at each stage                                                                                                                                                         | 11      |
|                          |     | (c) Consider use of a flow diagram                                                                                                                                                                           |         |
| Descriptive data         | 14* | (a) Give characteristics of study participants (eg demographic, clinical, social) and information on exposures and potential confounders                                                                     | 11-12   |
|                          |     | (b) Indicate number of participants with missing data for each variable of interest                                                                                                                          |         |
|                          |     | (c) <i>Cohort study</i> —Summarise follow-up time (eg, average and total amount)                                                                                                                             |         |
| Outcome data             | 15* | <i>Cohort study</i> —Report numbers of outcome events or summary measures over time                                                                                                                          |         |
|                          |     | <i>Case-control study</i> —Report numbers in each exposure category, or summary measures of exposure                                                                                                         |         |
|                          |     | <i>Cross-sectional study</i> —Report numbers of outcome events or summary measures                                                                                                                           | 13      |
| Main results             | 16  | (a) Give unadjusted estimates and, if applicable, confounder-adjusted estimates and their precision (eg, 95% confidence interval). Make clear which confounders were adjusted for and why they were included | 9,14-19 |
|                          |     | (b) Report category boundaries when continuous variables were categorized                                                                                                                                    |         |
|                          |     | (c) If relevant, consider translating estimates of relative risk into absolute risk for a meaningful time period                                                                                             |         |
| Other analyses           | 17  | Report other analyses done—eg analyses of subgroups and interactions, and sensitivity analyses                                                                                                               |         |
| <b>Discussion</b>        |     |                                                                                                                                                                                                              |         |
| Key results              | 18  | Summarise key results with reference to study objectives                                                                                                                                                     | 19-23   |
| Limitations              | 19  | Discuss limitations of the study, taking into account sources of potential bias or imprecision. Discuss both direction and magnitude of any potential bias                                                   | 23      |
| Interpretation           | 20  | Give a cautious overall interpretation of results considering objectives, limitations, multiplicity of analyses, results from similar studies, and other relevant evidence                                   | 23      |
| Generalisability         | 21  | Discuss the generalisability (external validity) of the study results                                                                                                                                        | 23      |
| <b>Other information</b> |     |                                                                                                                                                                                                              |         |
| Funding                  | 22  | Give the source of funding and the role of the funders for the present study and, if applicable, for the original study on which the present article is based                                                |         |

\*Give information separately for cases and controls in case-control studies and, if applicable, for exposed and unexposed groups in cohort and cross-sectional studies.

**Note:** An Explanation and Elaboration article discusses each checklist item and gives methodological background and published examples of transparent reporting. The STROBE checklist is best used in conjunction with this article (freely available on the Web sites of PLoS Medicine at <http://www.plosmedicine.org/>, Annals of Internal Medicine at <http://www.annals.org/>, and Epidemiology at <http://www.epidem.com/>). Information on the STROBE Initiative is available at [www.strobe-statement.org](http://www.strobe-statement.org).





**Tobacco Use and Associated Factors among Adolescent Students in Dharan, Eastern Nepal: A Cross Sectional Questionnaire Survey**

|                                 |                                                                                                                                                                                                                                                                                                                                                                                                                                                                                                                                                         |
|---------------------------------|---------------------------------------------------------------------------------------------------------------------------------------------------------------------------------------------------------------------------------------------------------------------------------------------------------------------------------------------------------------------------------------------------------------------------------------------------------------------------------------------------------------------------------------------------------|
| Journal:                        | <i>BMJ Open</i>                                                                                                                                                                                                                                                                                                                                                                                                                                                                                                                                         |
| Manuscript ID:                  | bmjopen-2012-002123.R3                                                                                                                                                                                                                                                                                                                                                                                                                                                                                                                                  |
| Article Type:                   | Research                                                                                                                                                                                                                                                                                                                                                                                                                                                                                                                                                |
| Date Submitted by the Author:   | 21-Jan-2013                                                                                                                                                                                                                                                                                                                                                                                                                                                                                                                                             |
| Complete List of Authors:       | Pradhan, Pranil; B.P.Koirala Institute of Health Sciences, School of Public Health and Community Medicine<br>Niraula, Surya; B.P.Koirala Institute of Health Sciences, School of Public Health and Community Medicine<br>Ghimire, Anup; B.P.Koirala Institute of Health Sciences, School of Public Health and Community Medicine<br>Singh, Suman; B.P.Koirala Institute of Health Sciences, School of Public Health and Community Medicine<br>Pokharel, Paras; B.P.Koirala Institute of Health Sciences, School of Public Health and Community Medicine |
| <b>Primary Subject Heading</b>: | Public health                                                                                                                                                                                                                                                                                                                                                                                                                                                                                                                                           |
| Secondary Subject Heading:      | Smoking and tobacco                                                                                                                                                                                                                                                                                                                                                                                                                                                                                                                                     |
| Keywords:                       | PUBLIC HEALTH, Substance misuse < PSYCHIATRY, PREVENTIVE MEDICINE                                                                                                                                                                                                                                                                                                                                                                                                                                                                                       |
|                                 |                                                                                                                                                                                                                                                                                                                                                                                                                                                                                                                                                         |

SCHOLARONE™  
Manuscripts

**Title:** Tobacco Use and Associated Factors among Adolescent Students in Dharan, Eastern Nepal: A Cross Sectional Questionnaire Survey

**Corresponding Author:**

Dr. Prnil Man Singh Pradhan

Post Graduate Student (Community Medicine and Tropical Diseases)

School of Public Health and Community Medicine

B.P. Koirala Institute of Health Sciences (BPKIHS)

Dharan, Nepal

Phone: 9771025-525555-2626

P.O. Box 7053

Email: prnil.pradhan@gmail.com

**Co authors:**

|    | <b>Co authors' Name</b>  | <b>Designation</b>   | <b>Department</b>                                                     |
|----|--------------------------|----------------------|-----------------------------------------------------------------------|
| 1. | Dr. Surya Raj Niraula    | Additional Professor | School of Public Health and Community Medicine, BPKIHS, Dharan, Nepal |
| 2. | Dr. Anup Ghimire         | Associate Professor  | School of Public Health and Community Medicine, BPKIHS, Dharan, Nepal |
| 3. | Dr. Suman Bahadur Singh  | Associate Professor  | School of Public Health and Community Medicine, BPKIHS, Dharan, Nepal |
| 4. | Dr. Paras Kumar Pokharel | Professor and Chief  | School of Public Health and Community Medicine, BPKIHS, Dharan, Nepal |

**Keywords:** tobacco use, adolescent students, Nepal

**Word Count:** 3525

## Article Summary

### 1. Article focus

- What is the prevalence of tobacco use among the adolescent students of Dharan after the legalization of anti tobacco directives in Nepal?
- What are the factors associated with tobacco use among the students?

### 2. Key messages

- Tobacco use is still prevalent among the adolescent students of Dharan despite the existence of anti-tobacco regulations in the country.
- Tobacco focussed interventions should target vulnerable groups to prevent uptake of the habit and support abstinence among the users taking the factors found significant in this study

### 3. Strengths

- Use of a standard questionnaire enabled our study for comparison with other studies

### 4. Limitations

- Since tobacco use was assessed by self administered questionnaire, chances of bias in responses exist.
- Tobacco use status was not validated by biomarkers in our study.
- Smaller sample size limited our study to school going adolescents only.

1  
2  
3  
4  
5  
6  
7  
8  
9  
10  
11  
12  
13  
14  
15  
16  
17  
18  
19  
20  
21  
22  
23  
24  
25  
26  
27  
28  
29  
30  
31  
32  
33  
34  
35  
36  
37  
38  
39  
40  
41  
42  
43  
44  
45  
46  
47  
48  
49  
50  
51  
52  
53  
54  
55  
56  
57  
58  
59  
60

- The temporal association between the independent variables and tobacco use could not be established due to the study design being cross sectional.

For peer review only

1  
2  
3 **Tobacco Use and Associated Factors among Adolescent Students in Dharan, Eastern**  
4  
5 **Nepal: A Cross Sectional Questionnaire Survey**  
6  
7

8  
9 Pradhan PMS<sup>1</sup>, Niraula SR<sup>2</sup>, Ghimire A<sup>3</sup>, Singh SB<sup>3</sup>, Pokharel PK<sup>4</sup>  
10

11  
12 (<sup>1</sup>Post Graduate Student, <sup>2</sup> Additional Professor, <sup>3</sup> Associate Professor, <sup>4</sup> Professor  
13  
14 School of Public Health and Community Medicine, BPKIHS)  
15  
16

17  
18 **Abstract**  
19

20  
21 **Introduction:** The tobacco use among the youth, in both smoking and smokeless forms, is quite  
22  
23 high in the South East Asia region. Tobacco use is a major proven risk factor and contributes  
24  
25 substantially to the rising epidemic of non communicable diseases.  
26  
27

28  
29 **Objectives:** To estimate the prevalence of tobacco use and determine associated factors among  
30  
31 adolescent students of Dharan municipality  
32  
33

34  
35 **Design:** Cross sectional study  
36  
37

38  
39 **Setting:** Secondary and higher secondary schools of Dharan municipality in Sunsari district of  
40  
41 Nepal  
42

43  
44 **Participants:** Students in middle (14-15 years) and late adolescence (16-19 years) from grades  
45  
46 9, 10, 11 and 12 were included.  
47  
48

49  
50 **Primary outcome measure:** Ever tobacco use which was defined as one who had not used any  
51  
52 form of tobacco in the past one month but had tried in the past.  
53  
54  
55  
56  
57

1  
2  
3 **Methodology:** Self administered questionnaire adapted from Global Youth Tobacco Survey was  
4  
5 used to assess tobacco use among the representative sample of 1312 adolescent students selected  
6  
7 by stratified random sampling from July 2011 to July 2012.  
8  
9

10  
11 **Results:** Out of 1454 students, 1312 students completed the questionnaires with response rate of  
12  
13 90.23%. Prevalence of ever use of any tobacco product was 19.7% (95% CI: 17.7-21.6). More  
14  
15 than half of the tobacco users (51.9%) consumed tobacco in public places whereas almost a third  
16  
17 (75.6%) of the consumers purchased tobacco from shops. Multivariate analysis showed that  
18  
19 tobacco use was associated with late adolescence (OR: 1.64; 95% CI: 1.17-2.28), male gender  
20  
21 (OR: 12.20; 95% CI: 7.78-19.14), type of school (OR=1.72; 95% CI: 1.01-2.94), Janajati  
22  
23 ethnicity (OR: 2.05; 95% CI: 1.39-3.01) and receiving pocket money  $\geq$  NRs.500 per month (OR:  
24  
25 1.45; 95% CI: 1.04-2.03).  
26  
27  
28  
29

30  
31 **Conclusion:** Tobacco focussed interventions are required for school/college going students in  
32  
33 order to promote cessation among users and prevent initiation, focusing on late adolescence,  
34  
35 male gender, government schools, Janajati ethnicity and higher amount of pocket money.  
36  
37  
38  
39  
40  
41  
42  
43  
44  
45  
46  
47  
48  
49  
50  
51  
52  
53  
54  
55  
56  
57  
58  
59  
60

## Introduction

Nearly 70% of the world's smokers live in low and middle income countries. **Nearly two-thirds of the world's smokers live in 10 countries, namely China, India, Indonesia, Russian Federation, the United States, Japan, Brazil, Bangladesh, Germany and Turkey.** [1] Unless a large number of current smokers in these countries quit, it is estimated that smoking will be causing 10 million deaths per year worldwide by the 2020s or early 2030s. [2]

The tobacco use among the youth, in both smoking and smokeless forms, is quite high in the South East Asia region including Nepal. One of the reasons for such high use could be the creative and targeted marketing strategies of various tobacco companies and its weak regulation. Abundant tobacco production, weak enforcement of tobacco control measures, easy accessibility and affordability of these products are other factors leading to the rise of the epidemic of tobacco use in the youth [3]. Although the exact burden of tobacco use among the youth has not been studied extensively in Nepal, a national Global Youth Tobacco Survey (GYTS) in 2007 reported that overall 7.9% of the students ever smoked cigarettes and 8% used other tobacco products [4]. Some of the factors known to be associated with tobacco use among adolescents are age, gender, having smoker friends or parents and the amount of pocket money [5-7].

The WHO has defined the adolescents as persons in the 10 to 19 years age group. It has also estimated that 70% of premature deaths among adults are due to behavioural patterns that emerge in adolescence including smoking, violence and sexual behaviour. Studies have shown that such risk taking behaviours begin to manifest from the middle adolescence (14-15 years of age) onwards [8]. The present study therefore, focussed on the specific groups of middle (14-15 years) and late adolescents (16-19 years).

1  
2  
3 The Government of Nepal had signed the Framework Convention on Tobacco Control (FCTC)  
4 on December 3, 2003 followed by its ratification by the House of Representatives on November  
5  
6  
7  
8 7, 2006. In what was regarded as a landmark in the nation's campaign against tobacco, the  
9  
10 government finally assented to the anti-tobacco directives of Tobacco Product Control and  
11  
12 Regulatory Act 2010 on November 4, 2011. This has reflected a strong will from the side of the  
13  
14 government to comply by objectives set out in the convention. A need was felt to estimate the  
15  
16 prevalence of tobacco use within the Nepalese youth who are the most vulnerable for adoption of  
17  
18 this habit in the background of recent endorsement of anti-tobacco directives by the government.  
19  
20 The present study was carried out with the objectives to estimate the prevalence of tobacco use  
21  
22 and determine associated factors among adolescent students of Dharan municipality of Sunsari  
23  
24 district of Nepal.  
25  
26  
27  
28  
29

## 30 **Methods**

### 31 32 33 **Description of study area**

34  
35  
36 Dharan is a major city in the Sunsari district in Eastern Region of Nepal located at an altitude of  
37  
38 1148 feet. It is situated on the foothills of the Mahabharat Range in the North with the southern  
39  
40 tip touching the edge of the Terai region. Dharan serves as a trading post between the hilly  
41  
42 region and the plains of the Terai. The foundation of modern Dharan was laid in 1902 with the  
43  
44 purpose to supply timber to the then East India Company. This small settlement grew steadily  
45  
46 over time to include diverse people from various ethnicities like Rai, Limbu, Gurung, Newar,  
47  
48 Brahmins, Chhetris and others. Dharan was once home to the British Gurkha Recruitment Center  
49  
50 which was established in 1953. Recruits from all over Nepal flocked to join the British Gurkhas.  
51  
52  
53 Thus the face of Dharan was drastically altered. There was a surge in population with recruits  
54  
55  
56  
57  
58  
59  
60



1  
2  
3 bringing their families and others who came to seek employment and exploit business  
4  
5 opportunities. As a result, Dharan started to emerge as one of the biggest towns in Eastern Nepal.  
6  
7

### 8 9 **Study design**

10  
11 This was a cross sectional study conducted in Dharan Municipality of Sunsari district of Nepal  
12  
13 from July 2011 to July 2012.  
14  
15

### 16 17 **Sample size and sampling method**

18  
19 From a similar study in South Delhi conducted among adolescents of 14-19 years, the overall  
20  
21 prevalence of tobacco use (smoking and smokeless forms) was 20.9% [8]. We calculated the  
22  
23 minimum sample size to estimate the prevalence for 95% confidence limits at an allowable error  
24  
25 of 10% to be 1454 individuals.  
26  
27  
28

29  
30 Students in middle (14-15 years) and late adolescence (16-19 years) from grades 9, 10, 11 and 12  
31  
32 in different schools of Dharan Municipality were included in this study. Current list of schools in  
33  
34 Dharan was obtained from Private and Boarding School's Organization, Nepal (PABSON). From  
35  
36 the list of 87 schools (80 private and 7 government schools), stratified random sampling with  
37  
38 proportionate allocation technique was carried out according to the type of schools. Since the  
39  
40 number of students in grades 9 to 12 in each school was not known, a number of 100 students per  
41  
42 school were assumed. This gave the total assumed population size to be 8700. Based on  
43  
44 population proportionate to size, 1337 students from private and 117 students from government  
45  
46 schools were included in the study sample. We randomly selected 15 private schools and 2  
47  
48 government schools in order to enroll the calculated number of students assuming 100 students  
49  
50  
51  
52  
53  
54  
55  
56  
57  
58  
59  
60

1  
2  
3 from each school. This was followed by random selection of classes from the selected schools.  
4  
5 All the students from the selected classes were included in the study.  
6  
7

### 8 9 **Data collection**

10  
11 Data collection was carried out using a self administered questionnaire adapted from Global  
12 Youth Tobacco Survey. The questionnaire to be used was pretested among the adolescent  
13 students in a different area and necessary corrections and modifications were made in order to  
14 make it more understandable for the students. An elaborative briefing on the questionnaire was  
15 done to all the students of the class prior to data collection.  
16  
17  
18  
19  
20  
21  
22  
23

### 24 25 **Definition of the variables**

26  
27  
28 Ever user: Ever user was defined as one who had not used any form of tobacco (smoked or  
29 chewed) in the past one month but had tried in the past. To assess the ever use participants were  
30 asked, "Prior to the past 30 days, have you ever smoked or chewed tobacco?" Affirmative  
31 response to this question was followed up with questions on type of tobacco used.  
32  
33  
34  
35  
36  
37

38 Current User: Current user was defined as one who had used any form of tobacco (Smoked or  
39 chewed) in the past one month.  
40  
41  
42

43 Ever tobacco use was considered as the dependent variable [7]. The following explanatory  
44 variables were chosen based on the previous literature: age group [8], gender [5,7], type of  
45 school [6,9], religion [7], ethnicity [9], type of family [8], parental occupation [13], pocket  
46 money [5-7] and parental tobacco use [5,7]. Type of school was categorized into private and  
47 government as more number of smokers was reported in private than government school [9].  
48  
49  
50  
51  
52  
53  
54

55 Ethnic groups were broadly classified into Brahmin/Chhetri, Janajati, Dalit and Terai Major  
56  
57

1  
2  
3 Caste as each ethnic group is a collection of many castes which have common customs, socio-  
4 economic, cultural and traditional values. Type of family was divided into nuclear and joint. The  
5 family with a married couple and their dependent children was nuclear whereas family with a  
6 number of married couples and their children living together in the same household was  
7 considered joint [25]. We used parental occupation as one of the explanatory variables since it  
8 was not possible to assess valid socioeconomic status of the family from the students. The pocket  
9 money was dichotomized based on the median amount received per month as there was a wide  
10 variation in the amounts and data was not normally distributed.  
11  
12  
13  
14  
15  
16  
17  
18  
19  
20  
21  
22

### 23 **Data analysis**

24  
25  
26 Collected data were entered into MS Windows Excel in the form of codes. Analysis was  
27 performed using Statistical Package for Social Sciences (SPSS) 17 version. In bivariate analysis  
28 with categorical variables, Chi-Square test was applied. Binary logistic regression analysis with  
29 backward elimination was used to determine the independence of associations observed in  
30 bivariate analysis by controlling for potential confounding factors. Goodness of fit of the model  
31 was tested by Hosmer and Lemeshow test. Probability of significance was set at 5%. Mann  
32 Whitney U test was applied to detect significant differences for non parametric data.  
33  
34  
35  
36  
37  
38  
39  
40  
41  
42

### 43 **Ethical clearance**

44  
45  
46 Ethical clearance was acquired from the ethical committee of B.P. Koirala Institute of Health  
47 Sciences at the start of the study. Informed consent was taken from all the participants. We  
48 obtained written permission from the school authorities before interaction with the students. All  
49 the students present at the time of the visit were included in the study. Participation in the study  
50  
51  
52  
53  
54  
55  
56  
57  
58  
59  
60

1  
2  
3 was entirely voluntary and full confidentiality of the responses was maintained after clear  
4 explanation of the objectives of the study. Absence of any school personnel or teacher at the time  
5  
6 of data collection was ensured in order to prevent response bias.  
7  
8  
9

## 10 11 **Results**

12  
13  
14 Of the total sample of 1454, 1312 students completed the questionnaires giving the response rate  
15 of 90.23%. Among the remaining questionnaires, eighty were incomplete whereas sixty two did  
16  
17 not match the age criteria therefore were excluded from the data analyses.  
18  
19  
20

### 21 22 *Socio-demographic characteristics*

23  
24  
25 Among the participants, median age was 16 years (Inter-quartile range 15-17 years). Proportion  
26 of students in the age group of middle adolescence (14-15 years) and late adolescence (16-19  
27 years) were almost equal. Age showed positive correlation with grade (Pearson correlation  
28 coefficient=0.756,  $p<0.001$ ). Participation was almost equal from both the gender (Male:  
29 Female=1.1:1). Participants who were Janajati by ethnicity were predominant. Other religions  
30 comprised of Chritianity, Muslim, Jainism, Sahajyog and Heavenly path or Premwaad (Lovism).  
31  
32  
33  
34  
35  
36  
37  
38  
39  
40 (Table 1)  
41  
42  
43  
44  
45  
46  
47  
48  
49  
50  
51  
52  
53  
54  
55  
56  
57  
58  
59  
60

**Table 1: Socio-demographic characteristics of the adolescent students in Dharan, Sunsari**  
(N=1312)

| Characteristics          | Number | Percentage |
|--------------------------|--------|------------|
| <b>Age Group (years)</b> |        |            |
| 14-15                    | 648    | 49.4       |
| 16-19                    | 664    | 50.6       |
| <b>Gender</b>            |        |            |
| Male                     | 694    | 52.9       |
| Female                   | 618    | 47.1       |
| <b>School</b>            |        |            |
| Private                  | 1176   | 89.6       |
| Government               | 136    | 10.4       |
| <b>Education Level</b>   |        |            |
| 9                        | 551    | 42         |
| 10                       | 422    | 32.2       |
| 11                       | 174    | 13.3       |
| 12                       | 165    | 12.6       |
| <b>Caste/Ethnicity*</b>  |        |            |
| Janajati                 | 816    | 62.2       |
| Brahmin/Chhetri          | 335    | 25.5       |
| Terai Major Caste        | 83     | 6.3        |
| Dalit                    | 78     | 5.9        |

**Religion**

|                       |            |            |
|-----------------------|------------|------------|
| Hindu                 | 1038       | 79.1       |
| <b>Buddhist/Kirat</b> | <b>126</b> | <b>9.6</b> |
| <b>Kirat</b>          | <b>80</b>  | <b>6.1</b> |
| Others                | 68         | 5.2        |

\*Janajati: Rai, Limbu, Magar, Newar; Brahmin/Chhetri: Baral, Neupane, Oli, Paudel  
Terai Major Caste: Agrawal, Das, Jha, Roy, Sah, Yadav; Dalit: Bafna, Kuki, Mardi,  
Tamli etc. [19]

Of the respondents' fathers who were alive, majority (34.2%) were involved in business. Almost four-fifths (80.5%) of the respondent's mothers who were alive were housewives and farmers.

*Prevalence of ever and current tobacco use*

The prevalence of ever tobacco use was 19.7% (95% CI: 17.7-21.6) in our study. The prevalence among males and females was 33.6% (95% CI: 30.2-36.9) and 4.0% (95% CI: 2.6-5.3) respectively. Prevalence of current tobacco users was 16.46% (95% CI: 15.37-17.42).

Among the ever smokers whose prevalence was 17.9%, 98.7% (232/235) had smoked cigarettes whereas 1.3% (3/235) had smoked hukka or cigar. Median number of sticks smoked per day was 2 (IQR 1-3). The prevalence of ever tobacco chewers was 8%. Among the ever chewers of tobacco, 34.28% (36/105) had consumed Gutkha (a mixture of crushed areca nut, tobacco, catechu, paraffin, lime and sweet or savory flavorings), 26.66% (28/105) Paan masala (a balanced mixture of betel leaf with lime, areca nut, clove, cardamom, mint, tobacco, essence and other ingredients), 7.61% (8/105) Surti (dried tobacco leaves for chewing), 21.90% (23/105) Khaini (mixture of sun-dried tobacco and slaked lime) and 9.52% (10/105) Zarda (small pieces of tobacco leaves with slaked lime and spices boiled and dried).

1  
2  
3 The median age of initiating tobacco smoking and chewing was 14 years (IQR= 13-15). The  
4  
5 mean age of initiating tobacco smoking was 13.79 years (SD = 2.21) whereas that of initiating  
6  
7 tobacco chewing was 13.58 years (SD = 2.11). More than half of the users (51.9%) preferred to  
8  
9 consume tobacco in public places followed by friend's house (14%). Almost a third (75.6%) of  
10  
11 the users purchased tobacco directly from the shops. Majority of the students started using  
12  
13 tobacco out of curiosity (41.1%) followed by to relieve tension (26.7%) and peer pressure  
14  
15 (25.5%).  
16  
17  
18  
19

#### 20 21 *Pocket money and expenditure on tobacco*

22  
23  
24 This study found the median expenditure on tobacco to be Nepalese Rupees (NRs). 100 per  
25  
26 month (Inter-quartile range 30-200) (NRs. 3.33 or 0.037 United States Dollar per day), which  
27  
28 was one fifth of their pocket money (Median 500, Inter-quartile range 300-1000). Median pocket  
29  
30 money (NRs.) received per month by the ever users (Median=500, IQR=300-1000) was  
31  
32 significantly different than the non users (Median= 500, IQR=247.50-600) ( $p < 0.001$ ).  
33  
34  
35

#### 36 37 *Bi-variate analysis*

38  
39  
40 In the bivariate analysis, students in the late adolescence were more likely to ever use tobacco  
41  
42 than those in middle adolescence (OR= 2.24; 95% CI: 1.67-3.01). Males were more likely to  
43  
44 ever use tobacco than females (OR= 11.98; 95% CI: 7.79-18.43). Students in grade 10 had more  
45  
46 than two times the odds of ever using tobacco than those in grade 9 (OR= 2.17; 95% CI: 1.56-  
47  
48 3.02). Compared to Brahmins/Chhetris, students belonging to Janajati ethnicity were more likely  
49  
50 to ever use tobacco (OR=1.76; 95% CI: 1.23-2.52). Students from nuclear families were less  
51  
52 likely to ever use tobacco than those from joint families (OR=0.75; 95% CI: 0.56-1.00). Students  
53  
54  
55  
56  
57  
58  
59  
60

1  
2  
3 whose fathers were working abroad in skilled or semi skilled work were more likely to ever use  
4 tobacco than those whose fathers were in service or professionals (OR=1.69; 95% CI:1.13-2.52).  
5  
6 Students who received pocket money of more than or equal to NRs. 500 per month were more  
7 likely to ever use tobacco than those who received less (OR=1.44; 95% CI: 1.08-1.92). (Table 2)  
8  
9  
10  
11  
12  
13  
14  
15  
16

17 **Table 2: Different characteristics of participants and tobacco use: Bi-variate analysis**  
18

19  
20  
21  
22  
23  
24  
25  
26  
27  
28  
29  
30  
31  
32  
33  
34  
35  
36  
37  
38  
39  
40  
41  
42  
43  
44  
45  
46  
47  
48  
49  
50  
51  
52  
53  
54  
55  
56  
57  
58  
59  
60

| Characteristics          | Ever User<br>N(%) | Non User<br>N(%)  | p value          | Crude OR<br>(95% CI) |
|--------------------------|-------------------|-------------------|------------------|----------------------|
| <b>Age Group (years)</b> |                   |                   |                  |                      |
| 14-15                    | 87 (13.4)         | 561 (86.6)        | <b>&lt;0.001</b> | 1                    |
| 16-19                    | 171 (25.8)        | 493 (74.2)        |                  | 2.24 (1.67-3.01)     |
| <b>Gender</b>            |                   |                   |                  |                      |
| Female                   | 25 (4.0)          | 593 (96.0)        | <b>&lt;0.001</b> | 1                    |
| Male                     | 233 (33.6)        | 461 (66.4)        |                  | 11.98 (7.79-18.43)   |
| <b>Type of School</b>    |                   |                   |                  |                      |
| Private                  | <b>230 (19.6)</b> | <b>946 (80.4)</b> | <b>0.775</b>     | 1                    |
| Government               | <b>28 (20.6)</b>  | <b>108 (79.4)</b> |                  | 1.07 (0.67-1.69)     |



**Grade**

|    |            |            |                  |                  |
|----|------------|------------|------------------|------------------|
| 9  | 82 (14.9)  | 469 (85.1) | <b>&lt;0.001</b> | 1                |
| 10 | 116 (27.5) | 306 (72.5) |                  | 2.17 (1.56-3.02) |
| 11 | 29 (16.7)  | 145 (83.3) |                  | 1.14 (0.70-1.86) |
| 12 | 31 (18.8)  | 134 (81.2) |                  | 1.32 (0.82-2.13) |

**Caste/Ethnicity**

|                   |            |            |                  |                  |
|-------------------|------------|------------|------------------|------------------|
| Brahmin / Chhetri | 49 (14.6)  | 286 (85.4) | <b>&lt;0.001</b> | 1                |
| Janajati          | 189 (23.2) | 627 (76.8) |                  | 1.76 (1.23-2.52) |
| Dalit             | 14 (17.9)  | 64 (82.1)  |                  | 1.28 (0.63-2.56) |
| Terai Major Caste | 6 (7.2)    | 77 (92.8)  |                  | 0.45 (0.17-1.16) |

**Type of Family**

|         |            |            |              |                  |
|---------|------------|------------|--------------|------------------|
| Joint   | 97 (22.9)  | 327 (77.1) | <b>0.043</b> | 1                |
| Nuclear | 161 (18.1) | 727 (81.9) |              | 0.75 (0.56-1.00) |

**Father's Occupation (n=1269)**

|                              |           |            |              |                  |
|------------------------------|-----------|------------|--------------|------------------|
| Service/Professional         | 49 (16.6) | 247 (83.4) | <b>0.002</b> | 1                |
| Rtd.Army/Unemployed          | 16 (27.1) | 43 (72.9)  |              | 1.88 (0.93-3.76) |
| Farmer                       | 23 (24.7) | 70 (75.3)  |              | 1.66 (0.91-3.01) |
| Business                     | 67 (15.4) | 367 (84.6) |              | 0.92 (0.60-1.40) |
| Foreign/Skilled/Semi Skilled | 97 (25.1) | 290 (74.9) |              | 1.69 (1.13-2.52) |

**Mother's Occupation (n=1295)**

|                      |           |            |       |   |
|----------------------|-----------|------------|-------|---|
| Service/Professional | 36 (21.1) | 135 (78.9) | 0.983 | 1 |
|----------------------|-----------|------------|-------|---|

1  
2  
3  
4  
5  
6  
7  
8  
9  
10  
11  
12  
13  
14  
15  
16  
17  
18  
19  
20  
21  
22  
23  
24  
25  
26  
27  
28  
29  
30  
31  
32  
33  
34  
35  
36  
37  
38  
39  
40  
41  
42  
43  
44  
45  
46  
47  
48  
49  
50  
51  
52  
53  
54  
55  
56  
57  
58  
59  
60

|                                  |            |            |              |                  |
|----------------------------------|------------|------------|--------------|------------------|
| Foreign/Skilled/Semi Skilled     | 20 (24.4)  | 62 (75.6)  |              | 1.21 (0.62-2.36) |
| Housewife/Farmer                 | 195 (18.7) | 847 (81.3) |              | 0.86 (0.57-1.31) |
| <b>Pocket Money/month (NRs.)</b> |            |            |              |                  |
| <500                             | 102 (16.6) | 511 (83.4) | <b>0.010</b> | 1                |
| ≥500                             | 156 (22.3) | 543 (77.7) |              | 1.44 (1.08-1.92) |
| <b>Parental tobacco use</b>      |            |            |              |                  |
| Absent                           | 139 (19.4) | 579 (80.6) | 0.760        | 1                |
| Present                          | 119 (20.0) | 475 (80.0) |              | 1.04 (0.79-1.38) |

### *Multivariate analysis*

After multivariate analysis, students in late adolescence (16-19 years) were more likely to be ever tobacco users compared to middle adolescence (14-15 years) (OR= 1.64; 95% CI: 1.17-2.28). Male were more likely to ever use tobacco compared to females (OR= 12.20; 95% CI: 7.78-19.14). The students from government schools were more likely to ever use tobacco than from private schools (OR=1.72; 95% CI: 1.01-2.94). Students from Janajati ethnicity were more than two times likely to be ever users of tobacco than those who were Brahmin/Chhetris (OR=2.05, 95% CI=1.39-3.01). Students belonging to nuclear families were less likely to ever use tobacco than those belonging to joint families (OR=0.71, 95% CI= 0.51-0.99). The adolescents who received pocket money of more than or equal to NRs.500 per month had higher odds of ever using tobacco compared to those who received less (OR= 1.45, 95% CI= 1.04, 2.03). (Table 3)

**Table 3: Association of different variables with tobacco use among adolescent students:****multivariate analysis (N=1312)**

| <b>Characteristics</b>        | <b>Adjusted Odds Ratio (95% CI)</b> |
|-------------------------------|-------------------------------------|
| <b>Age Group (years)</b>      |                                     |
| 14-15                         | 1.00                                |
| 16-19                         | <b>1.64 (1.17,2.28)</b>             |
| <b>Gender</b>                 |                                     |
| Female                        | 1.00                                |
| Male                          | <b>12.20 (7.78, 19.14)</b>          |
| <b>Type of school</b>         |                                     |
| Private                       | 1.00                                |
| Government                    | <b>1.72 (1.01, 2.94)</b>            |
| <b>Caste/Ethnicity</b>        |                                     |
| Brahmin/Chhetri               | 1.00                                |
| Janajati                      | <b>2.05 (1.39, 3.01)</b>            |
| Dalit                         | 1.67 (0.81, 3.46)                   |
| Terai Major Caste             | 0.51 (0.20, 1.29)                   |
| <b>Type of Family</b>         |                                     |
| Joint                         | 1.00                                |
| Nuclear                       | <b>0.71 (0.51, 0.99)</b>            |
| <b>Pocket Money per month</b> |                                     |

|      |                          |
|------|--------------------------|
| <500 | 1.00                     |
| ≥500 | <b>1.45 (1.04, 2.03)</b> |

---

*-2 Log likelihood=996.385, Chi-square=5.98, df=8, p=0.649*

## Discussion

National GYTS in Nepal in 2007 was conducted among students from 13-15 years age group only whereas our study included students from 14-19 years. Almost equal proportion of male and female students was involved in our study. Participants belonging to Janajati ethnicity were predominant. Similar study from Pokhara, Nepal reported nearly equal proportion of males and females with predominance of Brahmin ethnicity [9].

The prevalence of ever use of tobacco in this study was more compared to a study from western Nepal [7]. Prevalence of ever smokers of tobacco (17.9%) was high compared to National GYTS where 7.9% of students had ever smoked [4]. Regarding tobacco chewing, prevalence in our study (8.0%) was low compared to similar study among college students from western Nepal (21.2%) [20]. Inclusion of students from secondary and higher secondary level in our study could have attributed to this difference in prevalence.

The mean age for tobacco use initiation (smoking and chewing) in our study was found to be in consistency with studies from Kathmandu, Noida, and Kerala, India where the mean ages of onset were 14.15, 12.4 and 13.2 years respectively [12-14]. Early and middle adolescence is more vulnerable for initiation of tobacco use hence; a target group is highlighted for early intervention to reduce the uptake of this habit.

1  
2  
3 Our study has shown that more than half of the adolescent tobacco users prefer public places as  
4 their most common location of tobacco use and shops as the most common source. Similar  
5  
6 results have been obtained in the study from Pokhara, Nepal which showed that most of the  
7  
8 respondents (66.7%) smoked in public places like tea stalls or restaurants and majority purchased  
9  
10 tobacco from the shops [7]. National GYTS in 2007 reported that more than two-third (69.5%) of  
11  
12 the students were not refused tobacco purchase in stores because of their age [4]. According to a  
13  
14 study from Kerala, India, the most preferred places for smoking were friends' house and public  
15  
16 places [6]. Provision of unrestricted access to tobacco products in the shops especially to the  
17  
18 adolescents including minors, and its open use in public places pose a great challenge to the  
19  
20 implementation of the regulations of the anti tobacco law in Nepal.  
21  
22  
23  
24  
25  
26

27  
28 Curiosity, relieving tension and pressure from friends were the major reasons behind initiating  
29  
30 tobacco use in this study. In developing countries, documented factors implicated in the initiation  
31  
32 of tobacco use among youth include experimentation, peer pressure and feeling more matured  
33  
34 [21].  
35  
36  
37

38 Students in late adolescence were more likely to consume tobacco compared to those in middle  
39  
40 adolescence. Similar result was seen in a study from Kerala where students aged 16 years and  
41  
42 above were nearly three times more likely to be tobacco users compared to those who were 13  
43  
44 years old (Adjusted OR=2.9, CI=1.6-5.3) [6]. Tobacco use is more common in later adolescence  
45  
46 thus cessation attempts need to be focused in these groups.  
47  
48  
49

50  
51 Type of family can influence tobacco use. Ever use of tobacco was two times more likely in  
52  
53 students belonging to nuclear families compared to joint families (Adjusted OR=1.96, 95% CI:  
54  
55 1.11-3.45) in a study from India [8]. However, in our study tobacco use was less likely among  
56  
57  
58  
59  
60

1  
2  
3 students belonging to nuclear families. Close contact among parents and children in nuclear  
4  
5 families might play a protective role against taking up risky behavior like tobacco use.  
6  
7

8  
9 Prevalence of ever-tobacco use of any tobacco product was 19.0% (95% CI: 16.6-21.4) for  
10  
11 government school students compared to 10.1% (95% CI: 7.7-12.5) for private school students in  
12  
13 a study among urban youth of India [26]. As students from higher socioeconomic status (SES)  
14  
15 tend to study in private schools and those from lower SES study in government schools, findings  
16  
17 from our study highlights the socioeconomic differences that exist in tobacco use in our setting.  
18  
19

20  
21 Higher odds of tobacco use existed among boys as compared to girls. Similar difference of  
22  
23 prevalence between males and females was seen in other studies conducted in Nepal and abroad  
24  
25 [8-11]. Males were more likely to ever smoke than females in a study from western Nepal  
26  
27 (Adjusted OR=4.0; 95% CI=2.9-5.6) [22] and Haryana, India (Adjusted OR= 4.67; 95%  
28  
29 CI=1.91-11.4) [10]. Tobacco use can be considered as part of a constellation of risk-taking  
30  
31 behaviors that is more prevalent in the males [15]. In context of Nepal, teen smoking is viewed  
32  
33 as an acceptable behavior for boys but not for girls, especially among the unmarried. Large  
34  
35 proportions of teens in Asian countries, especially boys, pick up smoking as a part of normal  
36  
37 behavior associated with their transition to adulthood [23]. This striking gender differences in  
38  
39 tobacco use was also observed among Nepalese population aged 15 to 59 years [24]. However,  
40  
41 the rising trend of tobacco use among the girls should not be ignored. It has been mentioned that  
42  
43 when the prevalence of smoking among teen girls increases in Asian countries, it seems to  
44  
45 increase first in metropolitan areas. Continuing modernization is likely to narrow the gender  
46  
47 differences in smoking and is likely to result in high prevalence of smoking among teen girls in  
48  
49  
50  
51  
52  
53  
54  
55  
56  
57  
58  
59  
60

1  
2  
3 Asian countries [23]. Dharan, a town on the verge of rapid urbanization is likely to face this  
4  
5 scenario in the near future.  
6  
7

8  
9 Jajajatis were two times more likely to consume tobacco compared to Brahmins/Chhetris in our  
10  
11 study. Janajatis is the broad ethnic group comprising castes mainly from the hills of Nepal.  
12  
13 Tobacco chewing was significantly more among the hill native castes which included Rai,  
14  
15 Limbu, Magar, Tamang, Gurung whereas smoking was significantly higher among the hill  
16  
17 occupational castes which included Biswakarma, Pariyar and Sarki in a study conducted among  
18  
19 females population of Dharan [16]. Nepal Adolescent and Youth Survey (NAYS) in 2010  
20  
21 showed similar results in which relatively advantaged Janajatis had higher prevalence of liquor  
22  
23 (32.60%) and tobacco use (16.62%) followed by disadvantaged Janajatis (27.83% and 13.71%  
24  
25 respectively) [17]. The population of hill region is more diverse than the Terai region in its  
26  
27 ethnic, caste, and religious composition and the attitude towards smoking is more permissive  
28  
29 among the people from the hills [18]. This might be a possible explanation for the higher  
30  
31 prevalence of tobacco use seen among the Janajatis in various studies across Nepal including  
32  
33 ours.  
34  
35  
36  
37  
38

39  
40 Greater likelihood of using tobacco with higher amount of pocket money was reflected in other  
41  
42 studies as well [5,6]. Having some amount of disposable money at hand might predispose the  
43  
44 adolescents towards use of tobacco by easing the access. However, asking for more pocket  
45  
46 money to buy tobacco products could also be the reason behind the significance of the  
47  
48 association for which further studies are required.  
49  
50

51  
52  
53 Our study had few limitations. Even though the participation in the study was entirely voluntary  
54  
55 with an assurance of non disclosure of identity and confidentiality, chances of bias may occur in  
56  
57

1  
2  
3 the findings as the data was collected through self administered questionnaire. The assessment of  
4  
5 the tobacco use status was based entirely upon the response given by the subject believing that  
6  
7 false reporting was very unlikely. However this was not validated by biomarkers. Sample size of  
8  
9 the study was small and limited to school going adolescents of Dharan only hence cannot be  
10  
11 generalized to the rest of eastern Nepal. Peer pressure was found to be one of the reasons to start  
12  
13 tobacco use but was not included in the analysis part. The temporal association between the  
14  
15 independent variables and tobacco use could not be established due to the study design being  
16  
17 cross sectional.  
18  
19  
20  
21

## 22 23 **Conclusion**

24  
25  
26 The study revealed tobacco use is prevalent among the adolescent students despite the existence  
27  
28 of anti-tobacco regulations in the country. Late adolescence, male gender, Janajati ethnicity, type  
29  
30 of school and higher pocket money were significantly associated with tobacco use. Taking these  
31  
32 factors into consideration, tobacco focussed interventions should target vulnerable groups to  
33  
34 prevent uptake of the habit and support abstinence among the users. Further researches are  
35  
36 needed to explore the vulnerability of certain ethnic groups towards tobacco use to generate an  
37  
38 effective awareness campaign.  
39  
40  
41  
42

## 43 44 **Competing Interests**

45  
46  
47 The author(s) declare that they have no competing interests.  
48  
49

## 50 51 **Acknowledgement**



1  
2  
3 Our sincere appreciation goes to all the students who agreed to participate in this study and the  
4  
5 respected principals of the schools who allowed us to conduct this study by lending their  
6  
7 valuable time.  
8  
9

### 10 11 **Contributorship statement** 12

13  
14 Dr. Pranil Man Singh Pradhan was involved in designing the protocol, collection, entering and  
15  
16 analysis of data and preparation of the final document. Prof. Paras Kumar Pokharel was  
17  
18 responsible for the overall review of the protocol and final report and provided critical analysis  
19  
20 where needed. Dr. Surya Raj Niraula assisted in data entry and analysis and concentrated on  
21  
22 presentation of the results. Dr. Anup Ghimire and Dr. Suman Bahadur Singh were involved in  
23  
24 the critical review of the final report and provided necessary feedback.  
25  
26  
27  
28

### 29 30 **What this paper adds** 31

32  
33 This study highlights upon the prevalence of tobacco use that still exists among the adolescent  
34  
35 students after the endorsement of anti tobacco law in Nepal in 2011.  
36  
37

38  
39 Ethnicity was significantly associated with tobacco use as adolescent students belonging to  
40  
41 Janajati ethnicity had greater likelihood of using tobacco products compared to  
42  
43 Brahmins/Chhetris.  
44  
45

### 46 47 **Data sharing statement** 48

49  
50 Extra data is available by emailing Dr. Pranil Man Singh Pradhan (pranil.pradhan@gmail.com)  
51

### 52 53 **References** 54 55 56 57 58 59 60

- 1  
2  
3 1. Detels R, Beaglehole R, Lansang MA et al. Oxford Textbook of Public Health. Oxford  
4  
5 University Press 2009  
6  
7
- 8  
9 2. Warren CW, Jones NR, Eriksen MP et al for the Global Tobacco Surveillance System (GTSS)  
10  
11 collaborative group. Patterns of global tobacco use in young people and implications for future  
12  
13 chronic disease burden in adults. *Lancet* 2006;367:749-753  
14  
15
- 16  
17 3. WHO. Office for South-East Asia (SEARO). Profile on Implementation of WHO Framework  
18  
19 Convention on Tobacco Control in the South-East Asia Region. New Delhi, India. 2011  
20  
21
- 22  
23 4. Pandey MR, Pathak RP, Shrestha S et al. National Global Youth Tobacco Survey (GYTS) and  
24  
25 National Global School Personnel Survey (GSPS) in Nepal 2007  
26  
27
- 28  
29 5. Rachiotis G, Muula AS, Rudatsikira E et al. Factors associated with adolescent cigarette  
30  
31 smoking in Greece: Results from a cross sectional study (GYTS Study). *BMC Public Health*  
32  
33 2008;8:313  
34  
35
- 36  
37 6. Mohan S, Sarma PS, Thankappan KR. Access to Pocket money and low educational  
38  
39 performance predict tobacco use among adolescent boys in Kerala, India. *Preventive Medicine*  
40  
41 2005;41:685-692  
42  
43
- 44  
45 7. Sreeramareddy CT, Kishore P, Paudel J, Menezes RG. Prevalence and correlates of tobacco  
46  
47 use amongst junior collegiate in twin cities of western Nepal: A cross-sectional, questionnaire-  
48  
49 based survey. *BMC Public Health*. 2008;8:97  
50  
51
- 52  
53 8. Sharma R, Grover VL, Chaturvedi S. Tobacco Use Among Adolescent Students and the  
54  
55 Influence of Role Models. *Indian J Community Med* 2010;35(2)  
56  
57

- 1  
2  
3  
4  
5  
6  
7  
8  
9  
10  
11  
12  
13  
14  
15  
16  
17  
18  
19  
20  
21  
22  
23  
24  
25  
26  
27  
28  
29  
30  
31  
32  
33  
34  
35  
36  
37  
38  
39  
40  
41  
42  
43  
44  
45  
46  
47  
48  
49  
50  
51  
52  
53  
54  
55  
56  
57  
58  
59  
60
9. Paudel D, Pathak RP. Tobacco Use among Adolescent Students in Secondary Schools of Pokhara Sub Metropolitan City. *J Nepal Health Res Counc* 2003;1(2)
  10. Kapoor SK, Anand K, Kumar G. Prevalence of Tobacco Use Among School and College Going Adolescents of Haryana. *Indian J Pediatr* 1995;62:461-466
  11. Soteriades ES, Spanoudis G, Talias MA et al. Children's loss of autonomy over smoking: the global youth tobacco survey. *Tob Control* 2011;20:201-206
  12. Aryal UR, Deuba K, Subedi A et al. Prevalence and Determinants of Cigarette Students of Kathmandu Valley. *Asian Journal of Medical Sciences* 2010;1:53-58
  13. Narain R, Sardana S, Gupta S et al. Age at initiation & prevalence of tobacco use among school children in Noida, India: A cross-sectional questionnaire based survey. *Indian J Med Res* 2011;133(3):300-307
  14. Pradeepkumar AS, Mohan S, Gopalakrishnan P et al. Tobacco use in Kerala: findings from three recent studies. *Natl Med J India* 2005;18:148-153
  15. WHO. What about boys: A literature review on the health and development of adolescent boys. Geneva: WHO:2002
  16. Niraula SR. Tobacco Use among Women in Dharan, Eastern Nepal. *J Health Popul Nutr* 2004;22(1):68-74
  17. Population Division Government of Nepal Ministry of Health and Population. Nepal Adolescent and Youth Survey 2010/11 Highlights

- 1  
2  
3 18. Chloe MK, Kiting AS, Lin HS et al. The Youth Tobacco Epidemic in Asia. *East-West Center*  
4  
5 *Working Papers Population Series* 2001;108-117  
6  
7  
8  
9 19. Central Bureau of Statistics. Population Monograph of Nepal Volume 1 2003. National  
10  
11 Planning Commission. Government of Nepal  
12  
13  
14 20. Subba SH, Binu VS, Menezes RG, Ninan J, Rana MS. Tobacco chewing and associated  
15  
16 factors among youth of Western Nepal: A cross-sectional study. *Indian J Community Med*  
17  
18 2011;36:128-32  
19  
20  
21  
22 21. Al-Sadat N, Misau AY, Zariah Z, Maznah D, Su TT. Adolescent Tobacco Use and Health  
23  
24 in Southeast Asia. *Asia Pac J Public Health* 2010; 22( 3):175S-180S  
25  
26  
27  
28 22. Binu VS, Subba SH, Menezes RG et al. Smoking among Nepali Youth- Prevalence and  
29  
30 Predictors. *Asian Pacific J Cancer Prev* 2010;11: 221-226  
31  
32  
33 23. Choe MK, Thapa S, Podhisita C, Raymundo C, Lin H, Achmad S. The Teen Tobacco  
34  
35 Epidemic in Asia: Indonesia, Nepal, Philippines, Taiwan, and Thailand. *Journal of Youth Studies*  
36  
37 2004; 7(1): 73-87  
38  
39  
40  
41 24. Sreeramareddy CT, Ramakrishnareddy N, Harsha Kumar HN, Sathian B, Arokiasamy JT.  
42  
43 Prevalence, distribution and correlates of tobacco smoking and chewing in Nepal: a secondary  
44  
45 data analysis of Nepal Demographic and Health Survey-2006. *Substance Abuse Treatment,*  
46  
47 *Prevention, and Policy* 2011; 6(33)  
48  
49  
50  
51 25. Park K. Park's Textbook of Preventive and Social Medicine. 21<sup>st</sup> ed. M/s Banarsidas Bhanot  
52  
53 Publishers;2011  
54  
55  
56  
57  
58  
59  
60

1  
2  
3 26. Mathur C, Stigler MH, Perry CL, Arora M, Reddy KS. Differences in prevalence of tobacco  
4 use among Indian urban youth: The role of socioeconomic status. *Nicotine & Tobacco Research*  
5  
6 2008; 10 (1):109-116  
7  
8  
9  
10  
11  
12  
13  
14  
15  
16  
17  
18  
19  
20  
21  
22  
23  
24  
25  
26  
27  
28  
29  
30  
31  
32  
33  
34  
35  
36  
37  
38  
39  
40  
41  
42  
43  
44  
45  
46  
47  
48  
49  
50  
51  
52  
53  
54  
55  
56  
57  
58  
59  
60

For peer review only

**Title:** Tobacco Use and Associated Factors among Adolescent Students in Dharan, Eastern Nepal: A Cross Sectional Questionnaire Survey

**Corresponding Author:**

Dr. Pranil Man Singh Pradhan

Post Graduate Student (Community Medicine and Tropical Diseases)

School of Public Health and Community Medicine

B.P. Koirala Institute of Health Sciences (BPKIHS)

Dharan, Nepal

Phone: 9771025-525555-2626

P.O. Box 7053

Email: pranil.pradhan@gmail.com

**Co authors:**

|    | Co authors' Name         | Designation          | Department                                                            |
|----|--------------------------|----------------------|-----------------------------------------------------------------------|
| 1. | Dr. Surya Raj Niraula    | Additional Professor | School of Public Health and Community Medicine, BPKIHS, Dharan, Nepal |
| 2. | Dr. Anup Ghimire         | Associate Professor  | School of Public Health and Community Medicine, BPKIHS, Dharan, Nepal |
| 3. | Dr. Suman Bahadur Singh  | Associate Professor  | School of Public Health and Community Medicine, BPKIHS, Dharan, Nepal |
| 4. | Dr. Paras Kumar Pokharel | Professor and Chief  | School of Public Health and Community Medicine, BPKIHS, Dharan, Nepal |

**Keywords:** tobacco use, adolescent students, Nepal

**Word Count:** 3525

## Article Summary

### 1. Article focus

- What is the prevalence of tobacco use among the adolescent students of Dharan after the legalization of anti tobacco directives in Nepal?
- What are the factors associated with tobacco use among the students?

### 2. Key messages

- Tobacco use is still prevalent among the adolescent students of Dharan despite the existence of anti-tobacco regulations in the country.
- Tobacco focussed interventions should target vulnerable groups to prevent uptake of the habit and support abstinence among the users taking the factors found significant in this study

### 3. Strengths

- Use of a standard questionnaire enabled our study for comparison with other studies

### 4. Limitations

- Since tobacco use was assessed by self administered questionnaire, chances of bias in responses exist.
- Tobacco use status was not validated by biomarkers in our study.
- Smaller sample size limited our study to school going adolescents only.

1  
2  
3  
4  
5  
6  
7  
8  
9  
10  
11  
12  
13  
14  
15  
16  
17  
18  
19  
20  
21  
22  
23  
24  
25  
26  
27  
28  
29  
30  
31  
32  
33  
34  
35  
36  
37  
38  
39  
40  
41  
42  
43  
44  
45  
46  
47  
48  
49  
50  
51  
52  
53  
54  
55  
56  
57  
58  
59  
60

- The temporal association between the independent variables and tobacco use could not be established due to the study design being cross sectional.

For peer review only



1  
2  
3 **Tobacco Use and Associated Factors among Adolescent Students in Dharan, Eastern**  
4  
5 **Nepal: A Cross Sectional Questionnaire Survey**  
6  
7

8  
9 Pradhan PMS<sup>1</sup>, Niraula SR<sup>2</sup>, Ghimire A<sup>3</sup>, Singh SB<sup>3</sup>, Pokharel PK<sup>4</sup>  
10

11  
12 (<sup>1</sup>Post Graduate Student, <sup>2</sup> Additional Professor, <sup>3</sup> Associate Professor, <sup>4</sup> Professor  
13  
14 School of Public Health and Community Medicine, BPKIHS)  
15  
16

17  
18 **Abstract**  
19

20  
21 **Introduction:** The tobacco use among the youth, in both smoking and smokeless forms, is quite  
22  
23 high in the South East Asia region. Tobacco use is a major proven risk factor and contributes  
24  
25 substantially to the rising epidemic of non communicable diseases.  
26  
27

28  
29 **Objectives:** To estimate the prevalence of tobacco use and determine associated factors among  
30  
31 adolescent students of Dharan municipality  
32  
33

34  
35 **Design:** Cross sectional study  
36  
37

38  
39 **Setting:** Secondary and higher secondary schools of Dharan municipality in Sunsari district of  
40  
41 Nepal  
42

43  
44 **Participants:** Students in middle (14-15 years) and late adolescence (16-19 years) from grades  
45  
46 9, 10, 11 and 12 were included.  
47  
48

49  
50 **Primary outcome measure:** Ever tobacco use which was defined as one who had not used any  
51  
52 form of tobacco in the past one month but had tried in the past.  
53  
54  
55  
56  
57  
58  
59  
60

1  
2  
3 **Methodology:** Self administered questionnaire adapted from Global Youth Tobacco Survey was  
4 used to assess tobacco use among the representative sample of 1312 adolescent students selected  
5 by stratified random sampling from July 2011 to July 2012.  
6  
7

8  
9  
10  
11 **Results:** Out of 1454 students, 1312 students completed the questionnaires with response rate of  
12 90.23%. Prevalence of ever use of any tobacco product was 19.7% (95% CI: 17.7-21.6). More  
13 than half of the tobacco users (51.9%) consumed tobacco in public places whereas almost a third  
14 (75.6%) of the consumers purchased tobacco from shops. Multivariate analysis showed that  
15 tobacco use was associated with late adolescence (OR: 1.64; 95% CI: 1.17-2.28), male gender  
16 (OR: 12.20; 95% CI: 7.78-19.14), type of school (OR=1.72; 95% CI: 1.01-2.94), Janajati  
17 ethnicity (OR: 2.05; 95% CI: 1.39-3.01) and receiving pocket money  $\geq$  NRs.500 per month (OR:  
18 1.45; 95% CI: 1.04-2.03).  
19  
20  
21  
22  
23  
24  
25  
26  
27  
28  
29  
30

31 **Conclusion:** Tobacco focussed interventions are required for school/college going students in  
32 order to promote cessation among users and prevent initiation, focusing on late adolescence,  
33 male gender, government schools, Janajati ethnicity and higher amount of pocket money.  
34  
35  
36  
37  
38  
39  
40  
41  
42  
43  
44  
45  
46  
47  
48  
49  
50  
51  
52  
53  
54  
55  
56  
57  
58  
59  
60

## Introduction

Nearly 70% of the world's smokers live in low and middle income countries. **Nearly two-thirds of the world's smokers live in 10 countries, namely China, India, Indonesia, Russian Federation, the United States, Japan, Brazil, Bangladesh, Germany and Turkey.** [1] Unless a large number of current smokers in **these** countries quit, it is estimated that smoking will be causing 10 million deaths per year worldwide by the 2020s or early 2030s. [2]

The tobacco use among the youth, in both smoking and smokeless forms, is quite high in the South East Asia region **including Nepal. One of the reasons for such high use could be** the creative and targeted marketing strategies of various tobacco companies and its weak regulation. Abundant tobacco production, weak enforcement of tobacco control measures, easy accessibility and affordability of these products are other factors leading to the rise of the epidemic **of tobacco use** in the youth [3]. Although the exact burden of tobacco use among the youth has not been studied extensively in Nepal, a national Global Youth Tobacco Survey (GYTS) in 2007 reported that overall **7.9%** of the students ever smoked cigarettes **and 8% used other tobacco products** [4]. Some of the factors known to be associated with tobacco use among adolescents are age, gender, having smoker friends or parents and the amount of pocket money [5-7].

**The WHO has defined the adolescents as persons in the 10 to 19 years age group. It has also estimated that 70% of premature deaths among adults are due to behavioural patterns that emerge in adolescence including smoking, violence and sexual behaviour. Studies have shown that such risk taking behaviours begin to manifest from the middle adolescence (14-15 years of age) onwards [8]. The present study therefore, focussed on the specific groups of middle (14-15 years) and late adolescents (16-19 years).**

1  
2  
3 The Government of Nepal had signed the Framework Convention on Tobacco Control (FCTC)  
4 on December 3, 2003 followed by its ratification by the House of Representatives on November  
5  
6  
7  
8 7, 2006. In what was regarded as a landmark in the nation's campaign against tobacco, the  
9  
10 government finally assented to the anti-tobacco directives of Tobacco Product Control and  
11  
12 Regulatory Act 2010 on November 4, 2011. This has reflected a strong will from the side of the  
13  
14 government to comply by objectives set out in the convention. A need was felt to **estimate the**  
15  
16 **prevalence of tobacco use** within the Nepalese youth who are the most vulnerable for adoption of  
17  
18 this habit in the background of recent endorsement of anti-tobacco directives by the government.  
19  
20  
21  
22 **The present study was carried out with the objectives to estimate the prevalence of tobacco use**  
23  
24 **and determine associated factors among adolescent students of Dharan municipality of Sunsari**  
25  
26 **district of Nepal.**

## 30 **Methods**

### 33 **Description of study area**

34  
35  
36 Dharan is a major city in the Sunsari district in Eastern Region of Nepal located at an altitude of  
37  
38 1148 feet. It is situated on the foothills of the Mahabharat Range in the North with the southern  
39  
40 tip touching the edge of the Terai region. Dharan serves as a trading post between the hilly  
41  
42 region and the plains of the Terai. The foundation of modern Dharan was laid in 1902 with the  
43  
44 purpose to supply timber to the then East India Company. This small settlement grew steadily  
45  
46 over time to include diverse people from various ethnicities like Rai, Limbu, Gurung, Newar,  
47  
48 Brahmins, Chhetris and others. Dharan was once home to the British Gurkha Recruitment Center  
49  
50 which was established in 1953. Recruits from all over Nepal flocked to join the British Gurkhas.  
51  
52  
53  
54  
55 Thus the face of Dharan was drastically altered. There was a surge in population with recruits  
56  
57  
58  
59  
60

1  
2  
3 bringing their families and others who came to seek employment and exploit business  
4  
5 opportunities. As a result, Dharan started to emerge as one of the biggest towns in Eastern Nepal.  
6  
7

### 8 9 **Study design**

10  
11 This was a cross sectional study conducted in Dharan Municipality of Sunsari district of Nepal  
12  
13 from July 2011 to July 2012.  
14  
15

### 16 17 **Sample size and sampling method**

18  
19 From a similar study in South Delhi conducted among adolescents of 14-19 years, the overall  
20  
21 prevalence of tobacco use (smoking and smokeless forms) was 20.9% [8]. We calculated the  
22  
23 minimum sample size to estimate the prevalence for 95% confidence limits at an allowable error  
24  
25 of 10% to be 1454 individuals.  
26  
27  
28

29  
30 Students in middle (14-15 years) and late adolescence (16-19 years) from grades 9, 10, 11 and 12  
31  
32 in different schools of Dharan Municipality were included in this study. Current list of schools in  
33  
34 Dharan was obtained from Private and Boarding School's Organization, Nepal (PABSON). From  
35  
36 the list of 87 schools (80 private and 7 government schools), stratified random sampling with  
37  
38 proportionate allocation technique was carried out according to the type of schools. Since the  
39  
40 number of students in grades 9 to 12 in each school was not known, a number of 100 students per  
41  
42 school were assumed. This gave the total assumed population size to be 8700. Based on  
43  
44 population proportionate to size, 1337 students from private and 117 students from government  
45  
46 schools were included in the study sample. We randomly selected 15 private schools and 2  
47  
48 government schools in order to enroll the calculated number of students assuming 100 students  
49  
50  
51  
52  
53  
54  
55  
56  
57  
58  
59  
60

1  
2  
3 from each school. This was followed by random selection of classes from the selected schools.  
4  
5 All the students from the selected classes were included in the study.  
6  
7

### 8 9 **Data collection**

10  
11 Data collection was carried out using a self administered questionnaire adapted from Global  
12 Youth Tobacco Survey. The questionnaire to be used was pretested among the adolescent  
13 students in a different area and necessary corrections and modifications were made in order to  
14 make it more understandable for the students. An elaborative briefing on the questionnaire was  
15 done to all the students of the class prior to data collection.  
16  
17  
18  
19  
20  
21  
22  
23

### 24 25 **Definition of the variables**

26  
27  
28 Ever user: Ever user was defined as one who had not used any form of tobacco (smoked or  
29 chewed) in the past one month but had tried in the past. To assess the ever use participants were  
30 asked, "Prior to the past 30 days, have you ever smoked or chewed tobacco?" Affirmative  
31 response to this question was followed up with questions on type of tobacco used.  
32  
33  
34  
35  
36  
37

38 Current User: Current user was defined as one who had used any form of tobacco (Smoked or  
39 chewed) in the past one month.  
40  
41  
42

43  
44 Ever tobacco use was considered as the dependent variable [7]. The following explanatory  
45 variables were chosen based on the previous literature: age group [8], gender [5,7], type of  
46 school [6,9], religion [7], ethnicity [9], type of family [8], parental occupation [13], pocket  
47 money [5-7] and parental tobacco use [5,7]. Type of school was categorized into private and  
48 government as more number of smokers was reported in private than government school [9].  
49  
50  
51  
52  
53  
54

55 Ethnic groups were broadly classified into Brahmin/Chhetri, Janajati, Dalit and Terai Major  
56  
57

1  
2  
3  
4  
5  
6  
7  
8  
9  
10  
11  
12  
13  
14  
15  
16  
17  
18  
19  
20  
21  
22  
23  
24  
25  
26  
27  
28  
29  
30  
31  
32  
33  
34  
35  
36  
37  
38  
39  
40  
41  
42  
43  
44  
45  
46  
47  
48  
49  
50  
51  
52  
53  
54  
55  
56  
57  
58  
59  
60

Caste as each ethnic group is a collection of many castes which have common customs, socio-economic, cultural and traditional values. Type of family was divided into nuclear and joint. The family with a married couple and their dependent children was nuclear whereas family with a number of married couples and their children living together in the same household was considered joint [25]. We used parental occupation as one of the explanatory variables since it was not possible to assess valid socioeconomic status of the family from the students. The pocket money was dichotomized based on the median amount received per month as there was a wide variation in the amounts and data was not normally distributed.

### **Data analysis**

Collected data were entered into MS Windows Excel in the form of codes. Analysis was performed using Statistical Package for Social Sciences (SPSS) 17 version. In bivariate analysis with categorical variables, Chi-Square test was applied. Binary logistic regression analysis with backward elimination was used to determine the independence of associations observed in bivariate analysis by controlling for potential confounding factors. Goodness of fit of the model was tested by Hosmer and Lemeshow test. Probability of significance was set at 5%. Mann Whitney U test was applied to detect significant differences for non parametric data.

### **Ethical clearance**

Ethical clearance was acquired from the ethical committee of B.P. Koirala Institute of Health Sciences at the start of the study. Informed consent was taken from all the participants. We obtained written permission from the school authorities before interaction with the students. All the students present at the time of the visit were included in the study. Participation in the study

1  
2  
3 was entirely voluntary and full confidentiality of the responses was maintained after clear  
4 explanation of the objectives of the study. Absence of any school personnel or teacher at the time  
5  
6 of data collection was ensured in order to prevent response bias.  
7  
8  
9

## 10 11 **Results**

12  
13  
14 **Of the total sample of 1454**, 1312 students completed the questionnaires giving the response rate  
15 of 90.23%. Among the remaining questionnaires, eighty were incomplete whereas sixty two did  
16 not match the age criteria therefore were excluded from the data analyses.  
17  
18  
19

### 20 21 *Socio-demographic characteristics*

22  
23  
24 Among the participants, **median age was 16 years (Inter-quartile range 15-17 years)**. Proportion  
25 of students in the age group of middle adolescence (14-15 years) and late adolescence (16-19  
26 years) were almost equal. **Age showed positive correlation with grade (Pearson correlation**  
27 **coefficient=0.756, p<0.001)**. Participation was almost equal from both the gender (Male:  
28 Female=1.1:1). Participants who were Janajati by ethnicity were predominant. Other religions  
29 comprised of Chritianity, Muslim, Jainism, Sahajyog and Heavenly path or Premwaad (Lovism).  
30  
31  
32  
33  
34  
35  
36  
37  
38  
39  
40 (Table 1)  
41  
42  
43  
44  
45  
46  
47  
48  
49  
50  
51  
52  
53  
54  
55  
56  
57  
58  
59  
60



**Table 1: Socio-demographic characteristics of the adolescent students in Dharan, Sunsari**  
(N=1312)

| Characteristics          | Number      | Percentage  |
|--------------------------|-------------|-------------|
| <b>Age Group (years)</b> |             |             |
| 14-15                    | 648         | 49.4        |
| 16-19                    | 664         | 50.6        |
| <b>Gender</b>            |             |             |
| Male                     | 694         | 52.9        |
| Female                   | 618         | 47.1        |
| <b>School</b>            |             |             |
| <b>Private</b>           | <b>1176</b> | <b>89.6</b> |
| <b>Government</b>        | <b>136</b>  | <b>10.4</b> |
| <b>Education Level</b>   |             |             |
| 9                        | 551         | 42          |
| 10                       | 422         | 32.2        |
| 11                       | 174         | 13.3        |
| 12                       | 165         | 12.6        |
| <b>Caste/Ethnicity*</b>  |             |             |
| Janajati                 | 816         | 62.2        |
| Brahmin/Chhetri          | 335         | 25.5        |
| Terai Major Caste        | 83          | 6.3         |
| Dalit                    | 78          | 5.9         |

**Religion**

|                       |            |            |
|-----------------------|------------|------------|
| Hindu                 | 1038       | 79.1       |
| <b>Buddhist/Kirat</b> | <b>126</b> | <b>9.6</b> |
| <b>Kirat</b>          | <b>80</b>  | <b>6.1</b> |
| Others                | 68         | 5.2        |

**\*Janajati: Rai, Limbu, Magar, Newar; Brahmin/Chhetri: Baral, Neupane, Oli, Paudel Terai Major Caste: Agrawal, Das, Jha, Roy, Sah, Yadav; Dalit: Bafna, Kuki, Mardi, Tamli etc. [19]**

Of the respondents' fathers who were alive, majority (34.2%) were involved in business. Almost four-fifths (80.5%) of the respondent's mothers who were alive were housewives and farmers.

*Prevalence of ever and current tobacco use*

The prevalence of **ever tobacco use** was 19.7% (95% CI: 17.7-21.6) in our study. The prevalence among males and females was 33.6% (95% CI: 30.2-36.9) and 4.0% (95% CI: 2.6-5.3) respectively. **Prevalence of current tobacco users was 16.46% (95% CI: 15.37-17.42).**

Among the ever smokers **whose prevalence was 17.9%**, 98.7% (232/235) **had smoked** cigarettes whereas 1.3% (3/235) **had smoked** hukka or cigar. Median number of sticks smoked per day was 2 (IQR 1-3). **The prevalence of ever tobacco chewers was 8%.** Among the ever chewers of tobacco, 34.28% (36/105) **had consumed** Gutkha (a mixture of crushed areca nut, tobacco, catechu, paraffin, lime and sweet or savory flavorings), 26.66% (28/105) Paan masala (a balanced mixture of betel leaf with lime, areca nut, clove, cardamom, mint, tobacco, essence and other ingredients), 7.61% (8/105) Surti (dried tobacco leaves for chewing), 21.90% (23/105) Khaini (mixture of sun-dried tobacco and slaked lime) and 9.52% (10/105) Zarda (small pieces of tobacco leaves with slaked lime and spices boiled and dried).

1  
2  
3 The median age of initiating tobacco smoking and chewing was 14 years (IQR= 13-15). The  
4  
5 mean age of initiating tobacco smoking was 13.79 years (SD = 2.21) whereas that of initiating  
6  
7 tobacco chewing was 13.58 years (SD = 2.11). More than half of the users (51.9%) preferred to  
8  
9 consume tobacco in public places followed by friend's house (14%). Almost a third (75.6%) of  
10  
11 the users purchased tobacco directly from the shops. Majority of the students started using  
12  
13 tobacco out of curiosity (41.1%) followed by to relieve tension (26.7%) and peer pressure  
14  
15 (25.5%).  
16  
17  
18  
19

#### 20 21 *Pocket money and expenditure on tobacco*

22  
23  
24 This study found the median expenditure on tobacco to be Nepalese Rupees (NRs). 100 per  
25  
26 month (Inter-quartile range 30-200) (NRs. 3.33 or 0.037 United States Dollar per day), which  
27  
28 was one fifth of their pocket money (Median 500, Inter-quartile range 300-1000). **Median pocket**  
29  
30 **money (NRs.) received per month by the ever users (Median=500, IQR=300-1000) was**  
31  
32 **significantly different than the non users (Median= 500, IQR=247.50-600) (p<0.001).**  
33  
34  
35

#### 36 37 *Bi-variate analysis*

38  
39  
40 In the bivariate analysis, students in the late adolescence were more likely to ever use tobacco  
41  
42 than those in middle adolescence (OR= 2.24; 95% CI: 1.67-3.01). Males were more likely to  
43  
44 ever use tobacco than females (OR= 11.98; 95% CI: 7.79-18.43). Students in grade 10 had more  
45  
46 than two times the odds of ever using tobacco than those in grade 9 (OR= 2.17; 95% CI: 1.56-  
47  
48 3.02). Compared to Brahmins/Chhetris, students belonging to Janajati ethnicity were more likely  
49  
50 to ever use tobacco (OR=1.76; 95% CI: 1.23-2.52). Students from nuclear families were less  
51  
52 likely to ever use tobacco than those from joint families (OR=0.75; 95% CI: 0.56-1.00). Students  
53  
54  
55  
56  
57  
58  
59  
60

whose fathers were working abroad in skilled or semi skilled work were more likely to ever use tobacco than those whose fathers were in service or professionals (OR=1.69; 95% CI:1.13-2.52). Students who received pocket money of more than or equal to NRs. 500 per month were more likely to ever use tobacco than those who received less (OR=1.44; 95% CI: 1.08-1.92). (Table 2)

**Table 2: Different characteristics of participants and tobacco use: Bi-variate analysis**

| Characteristics          | Ever User<br>N(%) | Non User<br>N(%)  | p value      | Crude OR<br>(95%CI)     |
|--------------------------|-------------------|-------------------|--------------|-------------------------|
| <b>Age Group (years)</b> |                   |                   |              |                         |
| 14-15                    | 87 (13.4)         | 561 (86.6)        | <0.001       | 1                       |
| 16-19                    | 171 (25.8)        | 493 (74.2)        |              | 2.24 (1.67-3.01)        |
| <b>Gender</b>            |                   |                   |              |                         |
| Female                   | 25 (4.0)          | 593 (96.0)        | <0.001       | 1                       |
| Male                     | 233 (33.6)        | 461 (66.4)        |              | 11.98 (7.79-18.43)      |
| <b>Type of School</b>    |                   |                   |              |                         |
| <b>Private</b>           | <b>230 (19.6)</b> | <b>946 (80.4)</b> | <b>0.775</b> | <b>1</b>                |
| <b>Government</b>        | <b>28 (20.6)</b>  | <b>108 (79.4)</b> |              | <b>1.07 (0.67-1.69)</b> |

**Grade**

|    |            |            |                  |                  |
|----|------------|------------|------------------|------------------|
| 9  | 82 (14.9)  | 469 (85.1) | <b>&lt;0.001</b> | 1                |
| 10 | 116 (27.5) | 306 (72.5) |                  | 2.17 (1.56-3.02) |
| 11 | 29 (16.7)  | 145 (83.3) |                  | 1.14 (0.70-1.86) |
| 12 | 31 (18.8)  | 134 (81.2) |                  | 1.32 (0.82-2.13) |

**Caste/Ethnicity**

|                   |            |            |                  |                  |
|-------------------|------------|------------|------------------|------------------|
| Brahmin / Chhetri | 49 (14.6)  | 286 (85.4) | <b>&lt;0.001</b> | 1                |
| Janajati          | 189 (23.2) | 627 (76.8) |                  | 1.76 (1.23-2.52) |
| Dalit             | 14 (17.9)  | 64 (82.1)  |                  | 1.28 (0.63-2.56) |
| Terai Major Caste | 6 (7.2)    | 77 (92.8)  |                  | 0.45 (0.17-1.16) |

**Type of Family**

|         |            |            |              |                  |
|---------|------------|------------|--------------|------------------|
| Joint   | 97 (22.9)  | 327 (77.1) | <b>0.043</b> | 1                |
| Nuclear | 161 (18.1) | 727 (81.9) |              | 0.75 (0.56-1.00) |

**Father's Occupation (n=1269)**

|                              |           |            |              |                  |
|------------------------------|-----------|------------|--------------|------------------|
| Service/Professional         | 49 (16.6) | 247 (83.4) | <b>0.002</b> | 1                |
| Rtd.Army/Unemployed          | 16 (27.1) | 43 (72.9)  |              | 1.88 (0.93-3.76) |
| Farmer                       | 23 (24.7) | 70 (75.3)  |              | 1.66 (0.91-3.01) |
| Business                     | 67 (15.4) | 367 (84.6) |              | 0.92 (0.60-1.40) |
| Foreign/Skilled/Semi Skilled | 97 (25.1) | 290 (74.9) |              | 1.69 (1.13-2.52) |

**Mother's Occupation (n=1295)**

|                      |           |            |       |   |
|----------------------|-----------|------------|-------|---|
| Service/Professional | 36 (21.1) | 135 (78.9) | 0.983 | 1 |
|----------------------|-----------|------------|-------|---|

1  
2  
3  
4  
5  
6  
7  
8  
9  
10  
11  
12  
13  
14  
15  
16  
17  
18  
19  
20  
21  
22  
23  
24  
25  
26  
27  
28  
29  
30  
31  
32  
33  
34  
35  
36  
37  
38  
39  
40  
41  
42  
43  
44  
45  
46  
47  
48  
49  
50  
51  
52  
53  
54  
55  
56  
57  
58  
59  
60

|                              |            |            |  |                  |
|------------------------------|------------|------------|--|------------------|
| Foreign/Skilled/Semi Skilled | 20 (24.4)  | 62 (75.6)  |  | 1.21 (0.62-2.36) |
| Housewife/Farmer             | 195 (18.7) | 847 (81.3) |  | 0.86 (0.57-1.31) |

**Pocket Money/month (NRs.)**

|      |            |            |              |                  |
|------|------------|------------|--------------|------------------|
| <500 | 102 (16.6) | 511 (83.4) | <b>0.010</b> | 1                |
| ≥500 | 156 (22.3) | 543 (77.7) |              | 1.44 (1.08-1.92) |

**Parental tobacco use**

|         |            |            |       |                  |
|---------|------------|------------|-------|------------------|
| Absent  | 139 (19.4) | 579 (80.6) | 0.760 | 1                |
| Present | 119 (20.0) | 475 (80.0) |       | 1.04 (0.79-1.38) |

*Multivariate analysis*

After multivariate analysis, students in late adolescence (16-19 years) were more likely to be ever tobacco users compared to middle adolescence (14-15 years) (OR= 1.64; 95% CI: 1.17-2.28). Male were more likely to ever use tobacco compared to females (OR= 12.20; 95% CI: 7.78-19.14). The students from government schools were more likely to ever use tobacco than from private schools (OR=1.72; 95% CI: 1.01-2.94). Students from Janajati ethnicity were more than two times likely to be ever users of tobacco than those who were Brahmin/Chhetris (OR=2.05, 95% CI=1.39-3.01). Students belonging to nuclear families were less likely to ever use tobacco than those belonging to joint families (OR=0.71, 95% CI= 0.51-0.99). The adolescents who received pocket money of more than or equal to NRs.500 per month had higher odds of ever using tobacco compared to those who received less (OR= 1.45, 95% CI= 1.04, 2.03). (Table 3)

**Table 3: Association of different variables with tobacco use among adolescent students:  
multivariate analysis (N=1312)**

| Characteristics               | Adjusted Odds Ratio (95% CI) |
|-------------------------------|------------------------------|
| <b>Age Group (years)</b>      |                              |
| 14-15                         | 1.00                         |
| 16-19                         | <b>1.64 (1.17,2.28)</b>      |
| <b>Gender</b>                 |                              |
| Female                        | 1.00                         |
| Male                          | <b>12.20 (7.78, 19.14)</b>   |
| <b>Type of school</b>         |                              |
| Private                       | 1.00                         |
| Government                    | <b>1.72 (1.01, 2.94)</b>     |
| <b>Caste/Ethnicity</b>        |                              |
| Brahmin/Chhetri               | 1.00                         |
| Janajati                      | <b>2.05 (1.39, 3.01)</b>     |
| Dalit                         | 1.67 (0.81, 3.46)            |
| Terai Major Caste             | 0.51 (0.20, 1.29)            |
| <b>Type of Family</b>         |                              |
| Joint                         | 1.00                         |
| Nuclear                       | <b>0.71 (0.51, 0.99)</b>     |
| <b>Pocket Money per month</b> |                              |

|      |                          |
|------|--------------------------|
| <500 | 1.00                     |
| ≥500 | <b>1.45 (1.04, 2.03)</b> |

---

*-2 Log likelihood=996.385, Chi-square=5.98, df=8, p=0.649*

## Discussion

National GYTS in Nepal in 2007 was conducted among students from 13-15 years age group only whereas our study included students from 14-19 years. Almost equal proportion of male and female students was involved in our study. Participants belonging to Janajati ethnicity were predominant. Similar study from Pokhara, Nepal reported nearly equal proportion of males and females with predominance of Brahmin ethnicity [9].

The prevalence of ever use of tobacco in this study was more compared to a study from western Nepal [7]. Prevalence of ever smokers of tobacco (17.9%) was high compared to National GYTS where 7.9% of students had ever smoked [4]. Regarding tobacco chewing, prevalence in our study (8.0%) was low compared to similar study among college students from western Nepal (21.2%) [20]. Inclusion of students from secondary and higher secondary level in our study could have attributed to this difference in prevalence.

The mean age for tobacco use initiation (smoking and chewing) in our study was found to be in consistency with studies from Kathmandu, Noida, and Kerala, India where the mean ages of onset were 14.15, 12.4 and 13.2 years respectively [12-14]. Early and middle adolescence is more vulnerable for initiation of tobacco use hence; a target group is highlighted for early intervention to reduce the uptake of this habit.



1  
2  
3 Our study has shown that more than half of the adolescent tobacco users prefer public places as  
4 their most common location of tobacco use and shops as the most common source. Similar  
5 results have been obtained in the study from Pokhara, Nepal which showed that most of the  
6 respondents (66.7%) smoked in public places like tea stalls or restaurants and majority purchased  
7 tobacco from the shops [7]. National GYTS in 2007 reported that more than two-third (69.5%) of  
8 the students were not refused tobacco purchase in stores because of their age [4]. According to a  
9 study from Kerala, India, the most preferred places for smoking were friends' house and public  
10 places [6]. Provision of unrestricted access to tobacco products in the shops especially to the  
11 adolescents including minors, and its open use in public places pose a great challenge to the  
12 implementation of the regulations of the anti tobacco law in Nepal.  
13  
14  
15  
16  
17  
18  
19  
20  
21  
22  
23  
24  
25  
26

27  
28 Curiosity, relieving tension and pressure from friends were the major reasons behind initiating  
29 tobacco use in this study. In developing countries, documented factors implicated in the initiation  
30 of tobacco use among youth include experimentation, peer pressure and feeling more matured  
31 [21].  
32  
33  
34  
35  
36  
37

38 Students in late adolescence were more likely to consume tobacco compared to those in middle  
39 adolescence. Similar result was seen in a study from Kerala where students aged 16 years and  
40 above were nearly three times more likely to be tobacco users compared to those who were 13  
41 years old (Adjusted OR=2.9, CI=1.6-5.3) [6]. Tobacco use is more common in later adolescence  
42 thus cessation attempts need to be focused in these groups.  
43  
44  
45  
46  
47  
48  
49

50  
51 Type of family can influence tobacco use. Ever use of tobacco was two times more likely in  
52 students belonging to nuclear families compared to joint families (Adjusted OR=1.96, 95% CI:  
53 1.11-3.45) in a study from India [8]. However, in our study tobacco use was less likely among  
54  
55  
56  
57  
58  
59  
60

1  
2  
3 students belonging to nuclear families. Close contact among parents and children in nuclear  
4  
5 families might play a protective role against taking up risky behavior like tobacco use.  
6  
7

8  
9 Prevalence of ever-tobacco use of any tobacco product was 19.0% (95% CI: 16.6-21.4) for  
10  
11 government school students compared to 10.1% (95% CI: 7.7-12.5) for private school students in  
12  
13 a study among urban youth of India [26]. As students from higher socioeconomic status (SES)  
14  
15 tend to study in private schools and those from lower SES study in government schools, findings  
16  
17 from our study highlights the socioeconomic differences that exist in tobacco use in our setting.  
18  
19

20  
21 Higher odds of tobacco use existed among boys as compared to girls. Similar difference of  
22  
23 prevalence between males and females was seen in other studies conducted in Nepal and abroad  
24  
25 [8-11]. Males were more likely to ever smoke than females in a study from western Nepal  
26  
27 (Adjusted OR=4.0; 95% CI=2.9-5.6) [22] and Haryana, India (Adjusted OR= 4.67; 95%  
28  
29 CI=1.91-11.4) [10]. Tobacco use can be considered as part of a constellation of risk-taking  
30  
31 behaviors that is more prevalent in the males [15]. In context of Nepal, teen smoking is viewed  
32  
33 as an acceptable behavior for boys but not for girls, especially among the unmarried. Large  
34  
35 proportions of teens in Asian countries, especially boys, pick up smoking as a part of normal  
36  
37 behavior associated with their transition to adulthood [23]. This striking gender differences in  
38  
39 tobacco use was also observed among Nepalese population aged 15 to 59 years [24]. However,  
40  
41 the rising trend of tobacco use among the girls should not be ignored. It has been mentioned that  
42  
43 when the prevalence of smoking among teen girls increases in Asian countries, it seems to  
44  
45 increase first in metropolitan areas. Continuing modernization is likely to narrow the gender  
46  
47 differences in smoking and is likely to result in high prevalence of smoking among teen girls in  
48  
49  
50  
51  
52  
53  
54  
55  
56  
57  
58  
59  
60

1  
2  
3 Asian countries [23]. Dharan, a town on the verge of rapid urbanization is likely to face this  
4  
5 scenario in the near future.  
6  
7

8  
9 Jajajatis were two times more likely to consume tobacco compared to Brahmins/Chhetris in our  
10  
11 study. Janajatis is the broad ethnic group comprising castes mainly from the hills of Nepal.

12  
13 Tobacco chewing was significantly more among the hill native castes which included Rai,  
14  
15 Limbu, Magar, Tamang, Gurung whereas smoking was significantly higher among the hill  
16  
17 occupational castes which included Biswakarma, Pariyar and Sarki in a study conducted among  
18  
19 females population of Dharan [16]. Nepal Adolescent and Youth Survey (NAYS) in 2010  
20  
21 showed similar results in which relatively advantaged Janajatis had higher prevalence of liquor  
22  
23 (32.60%) and tobacco use (16.62%) followed by disadvantaged Janajatis (27.83% and 13.71%  
24  
25 respectively) [17]. The population of hill region is more diverse than the Terai region in its  
26  
27 ethnic, caste, and religious composition and the attitude towards smoking is more permissive  
28  
29 among the people from the hills [18]. This might be a possible explanation for the higher  
30  
31 prevalence of tobacco use seen among the Janajatis in various studies across Nepal including  
32  
33 ours.  
34  
35  
36  
37  
38

39  
40 Greater likelihood of using tobacco with higher amount of pocket money was reflected in other  
41  
42 studies as well [5,6]. Having some amount of disposable money at hand might predispose the  
43  
44 adolescents towards use of tobacco by easing the access. However, asking for more pocket  
45  
46 money to buy tobacco products could also be the reason behind the significance of the  
47  
48 association for which further studies are required.  
49  
50

51  
52 Our study had few limitations. Even though the participation in the study was entirely voluntary  
53  
54 with an assurance of non disclosure of identity and confidentiality, chances of bias may occur in  
55  
56

1  
2  
3 the findings as the data was collected through self administered questionnaire. The assessment of  
4  
5 the tobacco use status was based entirely upon the response given by the subject believing that  
6  
7 false reporting was very unlikely. However this was not validated by biomarkers. Sample size of  
8  
9 the study was small and limited to school going adolescents of Dharan only hence cannot be  
10  
11 generalized to the rest of eastern Nepal. Peer pressure was found to be one of the reasons to start  
12  
13 tobacco use but was not included in the analysis part. The temporal association between the  
14  
15 independent variables and tobacco use could not be established due to the study design being  
16  
17 cross sectional.  
18  
19  
20  
21

## 22 23 **Conclusion**

24  
25  
26 The study revealed tobacco use is prevalent among the adolescent students despite the existence  
27  
28 of anti-tobacco regulations in the country. Late adolescence, male gender, Janajati ethnicity, type  
29  
30 of school and higher pocket money were significantly associated with tobacco use. Taking these  
31  
32 factors into consideration, tobacco focussed interventions should target vulnerable groups to  
33  
34 prevent uptake of the habit and support abstinence among the users. Further researches are  
35  
36 needed to explore the vulnerability of certain ethnic groups towards tobacco use to generate an  
37  
38 effective awareness campaign.  
39  
40  
41  
42

## 43 44 **Competing Interests**

45  
46  
47 The author(s) declare that they have no competing interests.  
48  
49

## 50 51 **Acknowledgement**

1  
2  
3 Our sincere appreciation goes to all the students who agreed to participate in this study and the  
4  
5 respected principals of the schools who allowed us to conduct this study by lending their  
6  
7 valuable time.  
8  
9

### 10 11 **Contributorship statement**

12  
13  
14 Dr. Pranil Man Singh Pradhan was involved in designing the protocol, collection, entering and  
15  
16 analysis of data and preparation of the final document. Prof. Paras Kumar Pokharel was  
17  
18 responsible for the overall review of the protocol and final report and provided critical analysis  
19  
20 where needed. Dr. Surya Raj Niraula assisted in data entry and analysis and concentrated on  
21  
22 presentation of the results. Dr. Anup Ghimire and Dr. Suman Bahadur Singh were involved in  
23  
24 the critical review of the final report and provided necessary feedback.  
25  
26  
27  
28

### 29 30 **What this paper adds**

31  
32  
33 This study highlights upon the **prevalence** of tobacco use that still exists among the adolescent  
34  
35 students **after** the endorsement of anti tobacco law in Nepal in 2011.  
36  
37

38  
39 Ethnicity was significantly associated with tobacco use as adolescent students belonging to  
40  
41 Janajati ethnicity had greater likelihood of using tobacco products compared to  
42  
43 Brahmins/Chhetris.  
44  
45

### 46 47 **Data sharing statement**

48  
49  
50 Extra data is available by emailing Dr. Pranil Man Singh Pradhan (pranil.pradhan@gmail.com)  
51

### 52 53 **References**

- 1  
2  
3 1. Detels R, Beaglehole R, Lansang MA et al. Oxford Textbook of Public Health. Oxford  
4  
5 University Press 2009  
6  
7
- 8  
9 2. Warren CW, Jones NR, Eriksen MP et al for the Global Tobacco Surveillance System (GTSS)  
10  
11 collaborative group. Patterns of global tobacco use in young people and implications for future  
12  
13 chronic disease burden in adults. *Lancet* 2006;367:749-753  
14  
15
- 16  
17 3. WHO. Office for South-East Asia (SEARO). Profile on Implementation of WHO Framework  
18  
19 Convention on Tobacco Control in the South-East Asia Region. New Delhi, India. 2011  
20  
21
- 22  
23 4. Pandey MR, Pathak RP, Shrestha S et al. National Global Youth Tobacco Survey (GYTS) and  
24  
25 National Global School Personnel Survey (GSPS) in Nepal 2007  
26  
27
- 28  
29 5. Rachiotis G, Muula AS, Rudatsikira E et al. Factors associated with adolescent cigarette  
30  
31 smoking in Greece: Results from a cross sectional study (GYTS Study). *BMC Public Health*  
32  
33 2008;8:313  
34  
35
- 36  
37 6. Mohan S, Sarma PS, Thankappan KR. Access to Pocket money and low educational  
38  
39 performance predict tobacco use among adolescent boys in Kerala, India. *Preventive Medicine*  
40  
41 2005;41:685-692  
42  
43
- 44  
45 7. Sreeramareddy CT, Kishore P, Paudel J, Menezes RG. Prevalence and correlates of tobacco  
46  
47 use amongst junior collegiate in twin cities of western Nepal: A cross-sectional, questionnaire-  
48  
49 based survey. *BMC Public Health*. 2008;8:97  
50  
51
- 52  
53 8. Sharma R, Grover VL, Chaturvedi S. Tobacco Use Among Adolescent Students and the  
54  
55 Influence of Role Models. *Indian J Community Med* 2010;35(2)  
56  
57

- 1  
2  
3  
4  
5  
6  
7  
8  
9  
10  
11  
12  
13  
14  
15  
16  
17  
18  
19  
20  
21  
22  
23  
24  
25  
26  
27  
28  
29  
30  
31  
32  
33  
34  
35  
36  
37  
38  
39  
40  
41  
42  
43  
44  
45  
46  
47  
48  
49  
50  
51  
52  
53  
54  
55  
56  
57  
58  
59  
60
9. Paudel D, Pathak RP. Tobacco Use among Adolescent Students in Secondary Schools of Pokhara Sub Metropolitan City. *J Nepal Health Res Counc* 2003;1(2)
  10. Kapoor SK, Anand K, Kumar G. Prevalence of Tobacco Use Among School and College Going Adolescents of Haryana. *Indian J Pediatr* 1995;62:461-466
  11. Soteriades ES, Spanoudis G, Talias MA et al. Children's loss of autonomy over smoking: the global youth tobacco survey. *Tob Control* 2011;20:201-206
  12. Aryal UR, Deuba K, Subedi A et al. Prevalence and Determinants of Cigarette Students of Kathmandu Valley. *Asian Journal of Medical Sciences* 2010;1:53-58
  13. Narain R, Sardana S, Gupta S et al. Age at initiation & prevalence of tobacco use among school children in Noida, India: A cross-sectional questionnaire based survey. *Indian J Med Res* 2011;133(3):300-307
  14. Pradeepkumar AS, Mohan S, Gopalakrishnan P et al. Tobacco use in Kerala: findings from three recent studies. *Natl Med J India* 2005;18:148-153
  15. WHO. What about boys: A literature review on the health and development of adolescent boys. Geneva: WHO:2002
  16. Niraula SR. Tobacco Use among Women in Dharan, Eastern Nepal. *J Health Popul Nutr* 2004;22(1):68-74
  17. Population Division Government of Nepal Ministry of Health and Population. Nepal Adolescent and Youth Survey 2010/11 Highlights

- 1  
2  
3 18. Chloe MK, Kiting AS, Lin HS et al. The Youth Tobacco Epidemic in Asia. *East-West Center*  
4  
5 *Working Papers Population Series* 2001;108-117  
6  
7  
8  
9 19. Central Bureau of Statistics. *Population Monograph of Nepal Volume 1 2003*. National  
10  
11 *Planning Commission*. Government of Nepal  
12  
13  
14 20. Subba SH, Binu VS, Menezes RG, Ninan J, Rana MS. Tobacco chewing and associated  
15  
16 factors among youth of Western Nepal: A cross-sectional study. *Indian J Community Med*  
17  
18 2011;36:128-32  
19  
20  
21  
22 21. Al-Sadat N, Misau AY, Zariah Z, Maznah D, Su TT. Adolescent Tobacco Use and Health  
23  
24 in Southeast Asia. *Asia Pac J Public Health* 2010; 22( 3):175S-180S  
25  
26  
27  
28 22. Binu VS, Subba SH, Menezes RG et al. Smoking among Nepali Youth- Prevalence and  
29  
30 Predictors. *Asian Pacific J Cancer Prev* 2010;11: 221-226  
31  
32  
33 23. Choe MK, Thapa S, Podhisita C, Raymundo C, Lin H, Achmad S. The Teen Tobacco  
34  
35 Epidemic in Asia: Indonesia, Nepal, Philippines, Taiwan, and Thailand. *Journal of Youth Studies*  
36  
37 2004; 7(1): 73-87  
38  
39  
40  
41 24. Sreeramareddy CT, Ramakrishnareddy N, Harsha Kumar HN, Sathian B, Arokiasamy JT.  
42  
43 Prevalence, distribution and correlates of tobacco smoking and chewing in Nepal: a secondary  
44  
45 data analysis of Nepal Demographic and Health Survey-2006. *Substance Abuse Treatment,*  
46  
47 *Prevention, and Policy* 2011; 6(33)  
48  
49  
50  
51 25. Park K. *Park's Textbook of Preventive and Social Medicine*. 21<sup>st</sup> ed. M/s Banarsidas Bhanot  
52  
53 *Publishers*;2011  
54  
55  
56  
57  
58  
59  
60



1  
2  
3 26. Mathur C, Stigler MH, Perry CL, Arora M, Reddy KS. Differences in prevalence of tobacco  
4 use among Indian urban youth: The role of socioeconomic status. *Nicotine & Tobacco Research*  
5  
6 2008; 10 (1):109-116  
7  
8  
9  
10  
11  
12  
13  
14  
15  
16  
17  
18  
19  
20  
21  
22  
23  
24  
25  
26  
27  
28  
29  
30  
31  
32  
33  
34  
35  
36  
37  
38  
39  
40  
41  
42  
43  
44  
45  
46  
47  
48  
49  
50  
51  
52  
53  
54  
55  
56  
57  
58  
59  
60

For peer review only

**STROBE 2007 (v4) checklist of items to be included in reports of observational studies in epidemiology\***  
**Checklist for cohort, case-control, and cross-sectional studies (combined)**

| Section/Topic             | Item # | Recommendation                                                                                                                                                                                                                                                                                                                                                                                                                                                         | Reported on page # |
|---------------------------|--------|------------------------------------------------------------------------------------------------------------------------------------------------------------------------------------------------------------------------------------------------------------------------------------------------------------------------------------------------------------------------------------------------------------------------------------------------------------------------|--------------------|
| Title and abstract        | 1      | (a) Indicate the study’s design with a commonly used term in the title or the abstract                                                                                                                                                                                                                                                                                                                                                                                 | 4                  |
|                           |        | (b) Provide in the abstract an informative and balanced summary of what was done and what was found                                                                                                                                                                                                                                                                                                                                                                    | 4-5                |
| <b>Introduction</b>       |        |                                                                                                                                                                                                                                                                                                                                                                                                                                                                        |                    |
| Background/rationale      | 2      | Explain the scientific background and rationale for the investigation being reported                                                                                                                                                                                                                                                                                                                                                                                   | 5                  |
| Objectives                | 3      | State specific objectives, including any pre-specified hypotheses                                                                                                                                                                                                                                                                                                                                                                                                      | 6                  |
| <b>Methods</b>            |        |                                                                                                                                                                                                                                                                                                                                                                                                                                                                        |                    |
| Study design              | 4      | Present key elements of study design early in the paper                                                                                                                                                                                                                                                                                                                                                                                                                | 6                  |
| Setting                   | 5      | Describe the setting, locations, and relevant dates, including periods of recruitment, exposure, follow-up, and data collection                                                                                                                                                                                                                                                                                                                                        | 7-8                |
| Participants              | 6      | (a) <i>Cohort study</i> —Give the eligibility criteria, and the sources and methods of selection of participants. Describe methods of follow-up<br><i>Case-control study</i> —Give the eligibility criteria, and the sources and methods of case ascertainment and control selection. Give the rationale for the choice of cases and controls<br><i>Cross-sectional study</i> —Give the eligibility criteria, and the sources and methods of selection of participants | 8                  |
|                           |        | (b) <i>Cohort study</i> —For matched studies, give matching criteria and number of exposed and unexposed<br><i>Case-control study</i> —For matched studies, give matching criteria and the number of controls per case                                                                                                                                                                                                                                                 |                    |
| Variables                 | 7      | Clearly define all outcomes, exposures, predictors, potential confounders, and effect modifiers. Give diagnostic criteria, if applicable                                                                                                                                                                                                                                                                                                                               | 9-10               |
| Data sources/ measurement | 8*     | For each variable of interest, give sources of data and details of methods of assessment (measurement). Describe comparability of assessment methods if there is more than one group                                                                                                                                                                                                                                                                                   | 9                  |
| Bias                      | 9      | Describe any efforts to address potential sources of bias                                                                                                                                                                                                                                                                                                                                                                                                              | 10-11              |
| Study size                | 10     | Explain how the study size was arrived at                                                                                                                                                                                                                                                                                                                                                                                                                              | 8-9                |
| Quantitative variables    | 11     | Explain how quantitative variables were handled in the analyses. If applicable, describe which groupings were chosen and why                                                                                                                                                                                                                                                                                                                                           | 10                 |
| Statistical methods       | 12     | (a) Describe all statistical methods, including those used to control for confounding                                                                                                                                                                                                                                                                                                                                                                                  | 10                 |
|                           |        | (b) Describe any methods used to examine subgroups and interactions                                                                                                                                                                                                                                                                                                                                                                                                    | 10                 |
|                           |        | (c) Explain how missing data were addressed                                                                                                                                                                                                                                                                                                                                                                                                                            | 10                 |
|                           |        | (d) <i>Cohort study</i> —If applicable, explain how loss to follow-up was addressed<br><i>Case-control study</i> —If applicable, explain how matching of cases and controls was addressed                                                                                                                                                                                                                                                                              |                    |

|                          |     |                                                                                                                                                                                                              |         |
|--------------------------|-----|--------------------------------------------------------------------------------------------------------------------------------------------------------------------------------------------------------------|---------|
|                          |     | <i>Cross-sectional study</i> —If applicable, describe analytical methods taking account of sampling strategy                                                                                                 |         |
|                          |     | (e) Describe any sensitivity analyses                                                                                                                                                                        |         |
| <b>Results</b>           |     |                                                                                                                                                                                                              |         |
| Participants             | 13* | (a) Report numbers of individuals at each stage of study—eg numbers potentially eligible, examined for eligibility, confirmed eligible, included in the study, completing follow-up, and analysed            | 11      |
|                          |     | (b) Give reasons for non-participation at each stage                                                                                                                                                         | 11      |
|                          |     | (c) Consider use of a flow diagram                                                                                                                                                                           |         |
| Descriptive data         | 14* | (a) Give characteristics of study participants (eg demographic, clinical, social) and information on exposures and potential confounders                                                                     | 11-12   |
|                          |     | (b) Indicate number of participants with missing data for each variable of interest                                                                                                                          |         |
|                          |     | (c) <i>Cohort study</i> —Summarise follow-up time (eg, average and total amount)                                                                                                                             |         |
| Outcome data             | 15* | <i>Cohort study</i> —Report numbers of outcome events or summary measures over time                                                                                                                          |         |
|                          |     | <i>Case-control study</i> —Report numbers in each exposure category, or summary measures of exposure                                                                                                         |         |
|                          |     | <i>Cross-sectional study</i> —Report numbers of outcome events or summary measures                                                                                                                           | 13      |
| Main results             | 16  | (a) Give unadjusted estimates and, if applicable, confounder-adjusted estimates and their precision (eg, 95% confidence interval). Make clear which confounders were adjusted for and why they were included | 9,14-19 |
|                          |     | (b) Report category boundaries when continuous variables were categorized                                                                                                                                    |         |
|                          |     | (c) If relevant, consider translating estimates of relative risk into absolute risk for a meaningful time period                                                                                             |         |
| Other analyses           | 17  | Report other analyses done—eg analyses of subgroups and interactions, and sensitivity analyses                                                                                                               |         |
| <b>Discussion</b>        |     |                                                                                                                                                                                                              |         |
| Key results              | 18  | Summarise key results with reference to study objectives                                                                                                                                                     | 19-23   |
| Limitations              | 19  | Discuss limitations of the study, taking into account sources of potential bias or imprecision. Discuss both direction and magnitude of any potential bias                                                   | 23      |
| Interpretation           | 20  | Give a cautious overall interpretation of results considering objectives, limitations, multiplicity of analyses, results from similar studies, and other relevant evidence                                   | 23      |
| Generalisability         | 21  | Discuss the generalisability (external validity) of the study results                                                                                                                                        | 23      |
| <b>Other information</b> |     |                                                                                                                                                                                                              |         |
| Funding                  | 22  | Give the source of funding and the role of the funders for the present study and, if applicable, for the original study on which the present article is based                                                |         |

\*Give information separately for cases and controls in case-control studies and, if applicable, for exposed and unexposed groups in cohort and cross-sectional studies.

**Note:** An Explanation and Elaboration article discusses each checklist item and gives methodological background and published examples of transparent reporting. The STROBE checklist is best used in conjunction with this article (freely available on the Web sites of PLoS Medicine at <http://www.plosmedicine.org/>, Annals of Internal Medicine at <http://www.annals.org/>, and Epidemiology at <http://www.epidem.com/>). Information on the STROBE Initiative is available at [www.strobe-statement.org](http://www.strobe-statement.org).
